# Supplementary material
Source: PubMed Central journal article supplement (PMC8204862)
Supplement: EMBJ-40-e106393-s010.pdf [file EMBJ-40-e106393-s010.pdf]

## Appendix Information

### Non-canonical role of Phf5a in DNA repair and antibody class switch recombination relies on histone H2A variants regulation

Nasim A. Begum, Farazul Haque, Andre Stanlie, Afzal Husain, Samiran Mondal, Mikiyo Nakata, Takako Taniguchi, Hisaaki Taniguchi and Tasuku Honjo

### List of Contents

#### Appendix Figures

- Appendix Figure S1.** Screening of PHD domain-containing chromatin proteins for CSR.
- Appendix Figure S2.** Effect of Phf5a knockdown in Ig-CSR in primary B cells and CH12F3-2A cells.
- Appendix Figure S3.** Phf5a is dispensable for SHM and AID-induced DNA break.
- Appendix Figure S4.** Phf5a and H2A.Z promote NHEJ and prevent DNA end resection.
- Appendix Figure S5.** Loss of Phf5a or H2A.Z similarly affected recombination junctions.
- Appendix Figure S6.** Expression of histones and histone-PTMs upon Phf5a depletion.
- Appendix Figure S7.** AID-induced genomic instability is similarly affected by Phf5a/p400 KD.
- Appendix Figure S8.** Identification of loss-of-CSR function Phf5a mutant.
- Appendix Figure S9.** Phf5a mutants that do not impair CSR.
- Appendix Figure S10.** Phf5a K29 acetylation is dispensable for CSR.
- Appendix Figure S11.** Identification of Phf5a-interacting proteins from CH12F3-2A cells.
- Appendix Figure S12.** Phf5a KD weakens the interaction of p400 with Sf3b subunits but not with H2A.Z or H2AX.
- Appendix Figure S13.** AID expression does not impact IgH locus H2A.Z regulation.
- Appendix Figure S14.** Knockdown of U2snRNP subunits reduced AID expression and CSR.
- Appendix Figure S15.** Phf5a depletion did not inhibit expression of genes important for CSR.
- Appendix Figure S16.** Phf5a depletion did not perturb splicing of IgH and some other transcripts.
- Appendix Figure S17.** Effect of a splicing inhibitor on CSR and associated transcripts.

#### Appendix Tables

- Appendix Table S1.** Proteins identified in Phf5a-MF IP by MS analysis
- Appendix Table S2.** List of antibodies, reagents and constructs used
- Appendix Table S3.** List of assay specific oligonucleotides
- Appendix Table S4.** List of PCR primers used in Appendix Figure 15A
- Appendix Table S5.** List of PCR primers used in Appendix Figure 15B
- Appendix Table S6.** List of PCR primers used in Appendix Figures 16 and 17

| CSR %   | Up/Down | Knock down of PHD-domain containing candidate proteins in CH12F3-2A                               |
|---------|---------|---------------------------------------------------------------------------------------------------|
| 100     |         | Aire  546 aa     |
| 15-20   | ↓       | Baz1b  1483 aa  |
| 100     |         | Baz2b  2018 aa  |
| 150-200 | ↑       | Bptf1  3040 aa  |
| 100     |         | Phf6  365 aa     |
| 150-160 | ↑       | Phf7  381 aa     |
| 8-12    | ↓       | Phf5a  110 aa   |
| 40-50   | ↓       | Phf17  842 aa  |
| 50-60   | ↓       | Phf23  403 aa  |
| 20-25   | ↓       | Uhrf1  782 aa  |
| 20-25   | ↓       | p300  2414 aa |
| 10-15   | ↓       | CxxC1  661 aa  |

**Appendix Figure S1. Screening of PHD domain-containing chromatin proteins for CSR.** Schematic representation of the chromatin proteins selected for knock down in CH12F3-2A cells. The various functional domains in each protein are shown as different geometric shapes. The PHD (plant homeodomain) ring finger is depicted as a purple pentagon. The first column from the left represents the % of IgA switching, after KD of the indicated candidate genes, relative to that of siControl-transfected cells, which was set to 100. The positive or negative impact of the KD on CSR is indicated by an upward- or downward-pointing arrow, in the next column.

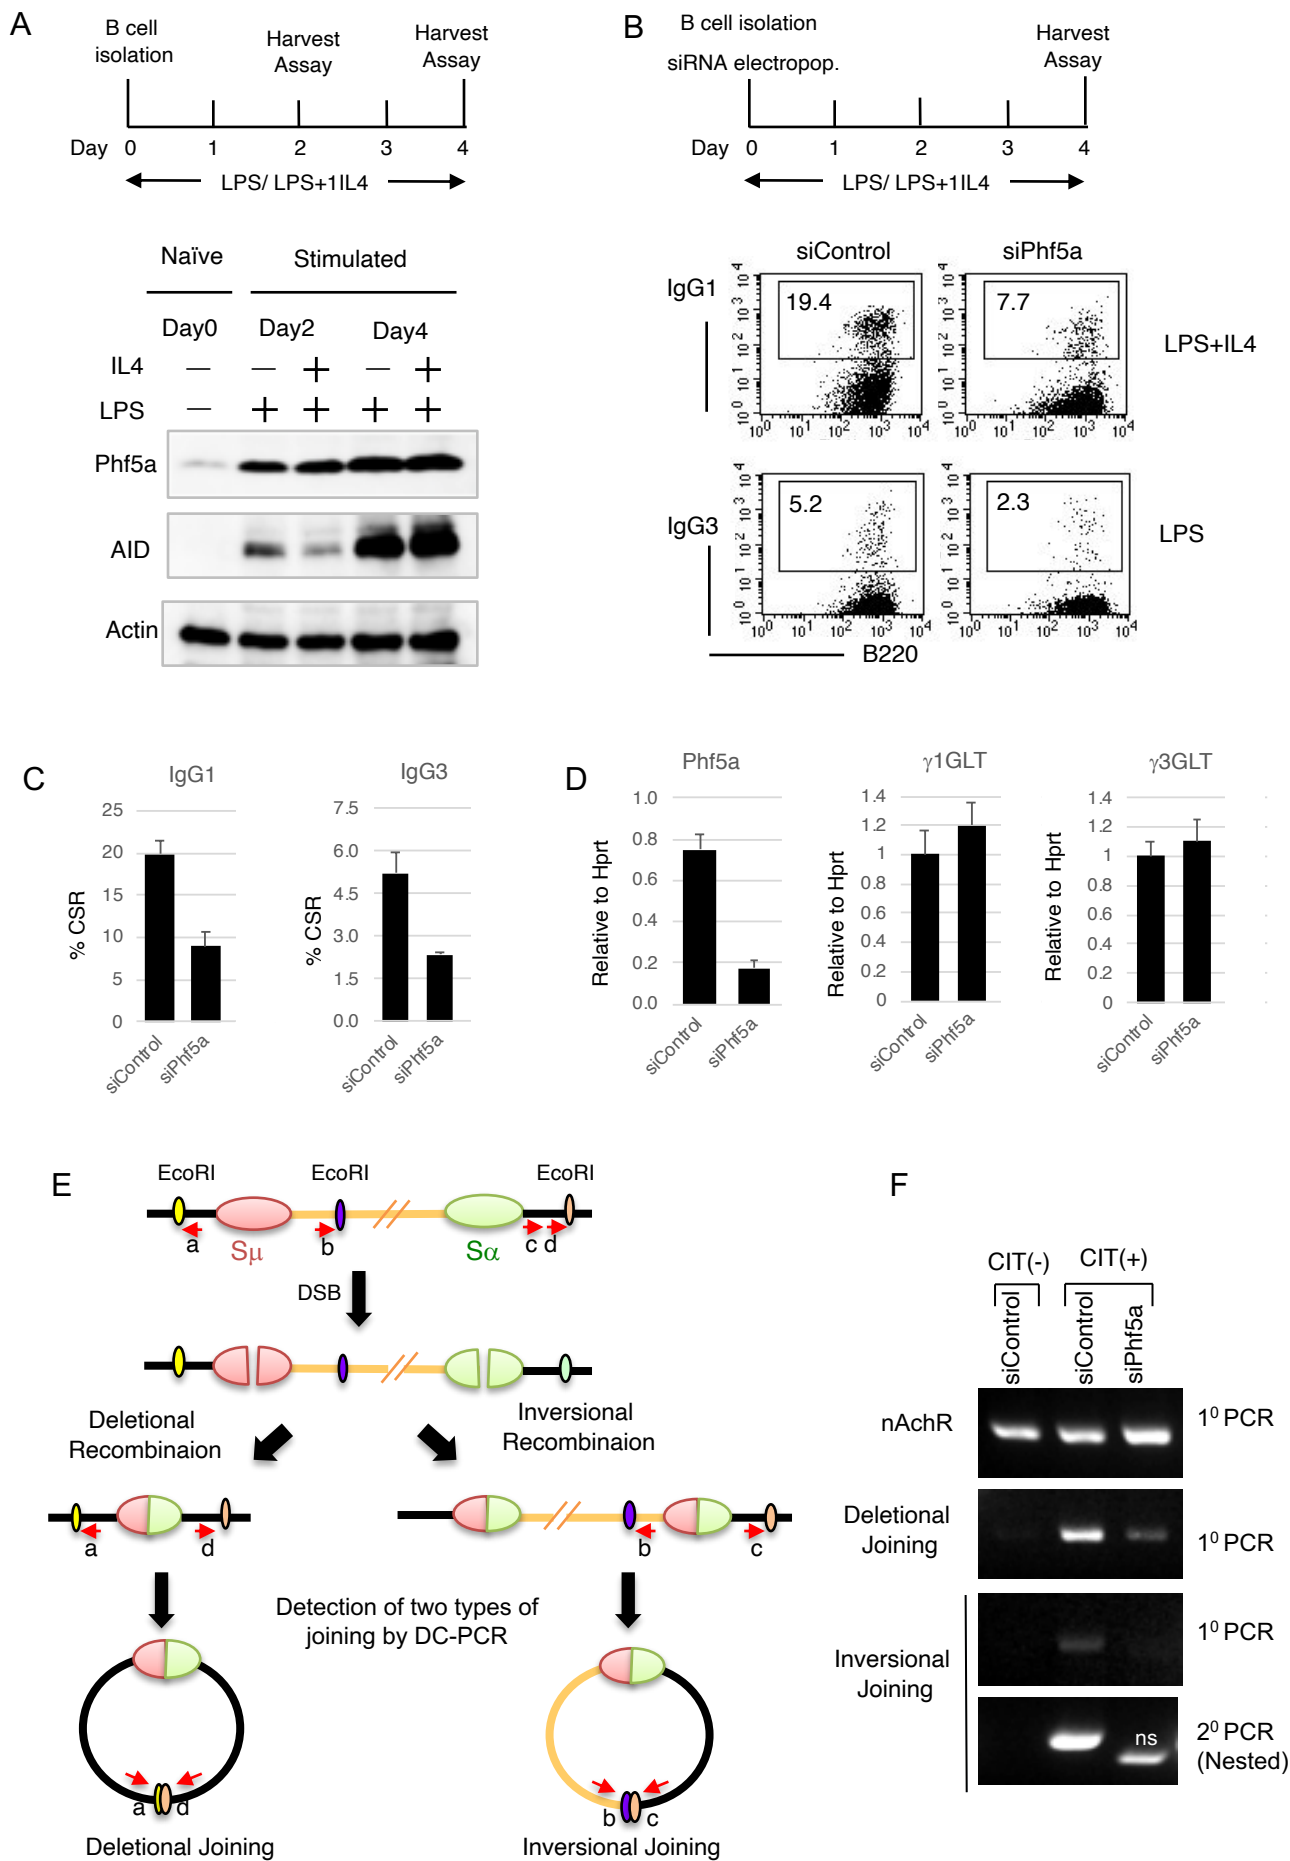

Appendix Figure S2

**Appendix Figure S2 : Effect of Phf5a knockdown in Ig-CSR in primary B cells and CH12F3-2A cells.** (A) Experimental design and the confirmation of Phf5a expression in naïve and stimulated B cells purified from spleens of 6 weeks old mice. Cells were stimulated with LPS or LPS+IL4 and harvested at two different time points as depicted. (B) Experimental design to assay the effect of Phf5a KD on the CSR in primary B cells. Percentages of the IgG1 and IgG3 switching are indicated in the representative plots. (C-D) Compilation of CSR and qRT-PCR analysis of transcript (n=3, mean  $\pm$  sd). (E-F) Analysis of the deletional and inversional recombination events during IgM to IgA class switching in CH12F3-2A cells. (E) Schematic illustration of the IgH locus undergoing deletional (productive) and inversional (non-productive) recombination after AID-induced DSB at S $\mu$  (light pink oval) and S $\alpha$  (light green oval). The position of the three *EcoRI* sites (3 small ellipses of different colors) relative to S $\mu$  and S $\alpha$  in the intact loci (top panel) will change after recombination (middle panel), which is detected in the DC-PCR assay. After *EcoRI* digestion and circularization of the isolated genomic DNA, two types of junctions were detected by PCR using a specific primer pair (deletional joining by primers a+d; inversional joining by primers b+c or b+d) (bottom panel). (F) A representative result of DC-PCR. CH12F3-2A cells were transfected with the indicated siRNAs, and 24 h later, the cells were stimulated by CIT for IgM to IgA switching. The genomic DNA was isolated and subjected to *EcoRI* digestion and the DC-PCR assay as described above and in the methods.



**A**

| Condition           | Total clones | Sequenced (bp) | Mutated clones | Total mutations | Mutation frequency    |
|---------------------|--------------|----------------|----------------|-----------------|-----------------------|
| siControl OHT (-)   | 58           | 23664          | 1              | 2               | $0.84 \times 10^{-4}$ |
| siControl OHT (+)   | 108          | 44064          | 26             | 42              | $9.53 \times 10^{-4}$ |
| siPhf5a #20 OHT (+) | 108          | 44064          | 22             | 38              | $8.62 \times 10^{-4}$ |
| siPhf5a #28 OHT (+) | 102          | 41616          | 20             | 37              | $8.91 \times 10^{-4}$ |

**B**

|      |   | siControl OHT(+) |   |   |    |     |    | siPhf5a #20 OHT(+) |   |    |     |    |   | siPhf5a #28 OHT(+) |    |     |  |  |  |
|------|---|------------------|---|---|----|-----|----|--------------------|---|----|-----|----|---|--------------------|----|-----|--|--|--|
|      |   | To               |   |   |    |     |    | To                 |   |    |     |    |   | To                 |    |     |  |  |  |
|      |   | A                | G | C | T  | Tot | A  | G                  | C | T  | Tot | A  | G | C                  | T  | Tot |  |  |  |
| From | A |                  |   |   |    | 0   |    |                    |   |    | 0   |    |   |                    |    | 0   |  |  |  |
|      | G | 15               |   | 6 |    | 21  | 17 |                    | 3 |    | 20  | 13 |   | 5                  | 2  | 20  |  |  |  |
|      | C |                  | 3 |   | 16 | 19  | 1  | 4                  |   | 13 | 18  |    | 2 |                    | 14 | 16  |  |  |  |
|      | T | 1                |   | 1 |    | 2   |    |                    |   |    | 0   |    |   | 1                  |    | 1   |  |  |  |
|      |   | 42               |   |   |    |     |    | 38                 |   |    |     |    |   | 37                 |    |     |  |  |  |

**C**

| Condition | Total clones | Sequenced (bp) | Mutated clones | Total mutations | Mutation frequency   |
|-----------|--------------|----------------|----------------|-----------------|----------------------|
| siControl | 157          | 88705          | 49             | 96              | $9.7 \times 10^{-4}$ |
| siPhf5a   | 150          | 84750          | 37             | 84              | $9.9 \times 10^{-4}$ |

**D**

|      |   | siControl CIT(+) |   |   |    |     |    | siPhf5a CIT(+) |   |    |     |  |  |
|------|---|------------------|---|---|----|-----|----|----------------|---|----|-----|--|--|
|      |   | To               |   |   |    |     |    | To             |   |    |     |  |  |
|      |   | A                | G | C | T  | Tot | A  | G              | C | T  | Tot |  |  |
| From | A |                  |   | 1 |    | 1   |    | 2              |   |    | 2   |  |  |
|      | G | 25               |   | 2 |    | 27  | 19 |                |   |    | 19  |  |  |
|      | C |                  | 1 |   | 67 | 68  |    | 1              |   | 62 | 63  |  |  |
|      | T |                  |   |   |    |     |    |                |   |    |     |  |  |
|      |   | 96               |   |   |    |     |    | 84             |   |    |     |  |  |

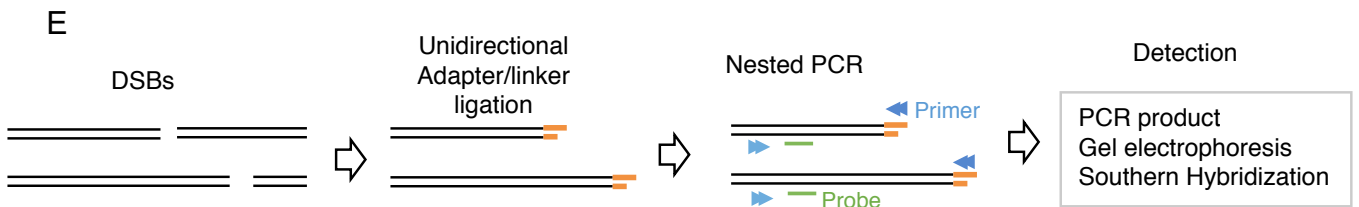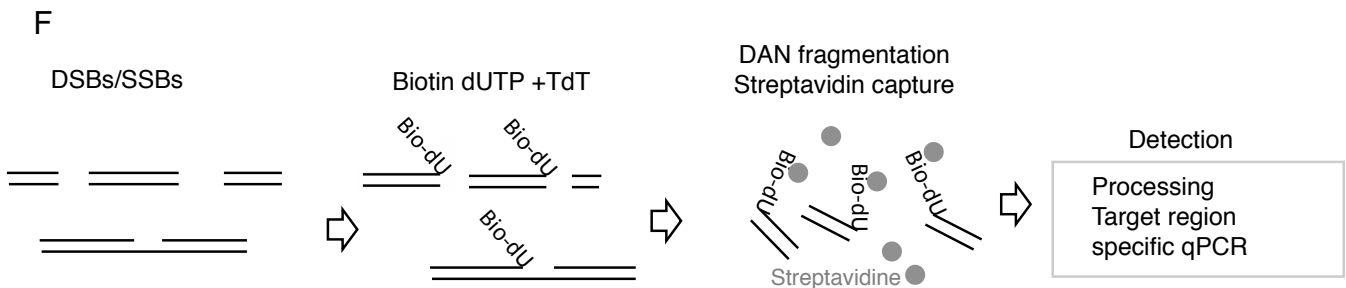

Appendix Figure S3

**Appendix Figure S3 : Phf5a is dispensable for SHM and AID-induced DNA break. (A)** A BL2 cell line expressing AID (JP8BdelER) was activated by OHT as depicted in Fig.3A, and described in the methods. The IgH V region was amplified by RT-PCR, cloned, and sequenced. The number of clones sequenced for mutation frequency analysis was tabulated. The data are compiled from two independent representative experiments. **(B)**. Nucleotide substitution profile summarized from the total number of mutations. **(C)** Somatic hypermutation analysis in the 5'S $\mu$  in CH12F3-2A cells. Cells were transfected with indicated siRNAs and stimulated with CIT for 2 days. The target region was PCR amplified and mutations were analyzed by cloning and sequencing. Mutation frequency was calculated from two independent experiments, and the total numbers of mutations analyzed are as shown. **(D)** Comparable mutation spectra was evident between control and Phf5a KD. **(E)** LM PCR assay to detect DNA double strand breaks. **(F)** DNA break detection by Biotin-dUTP break end labeling assay.

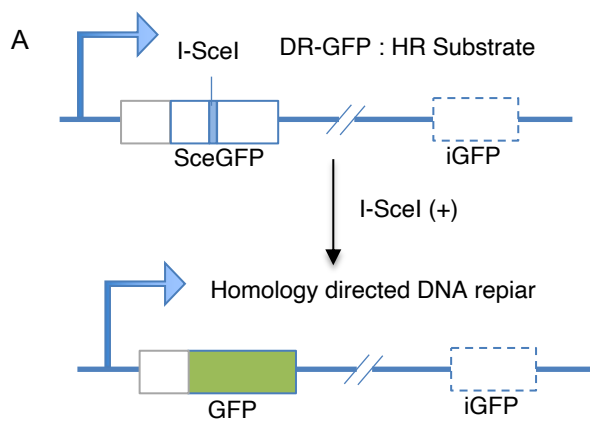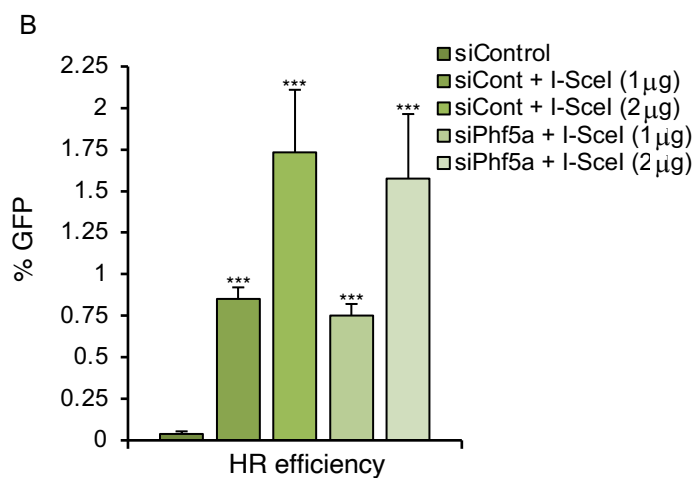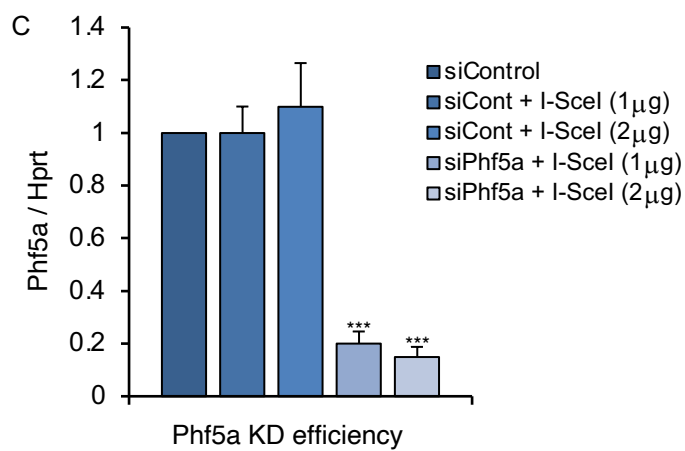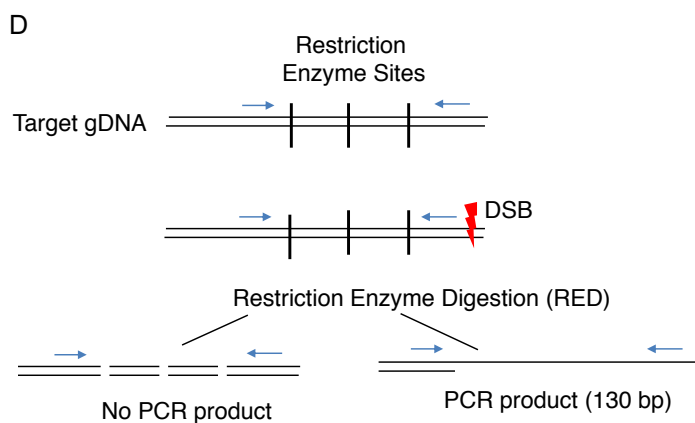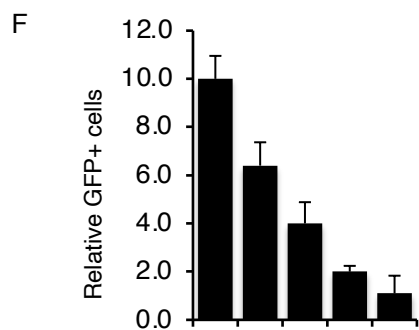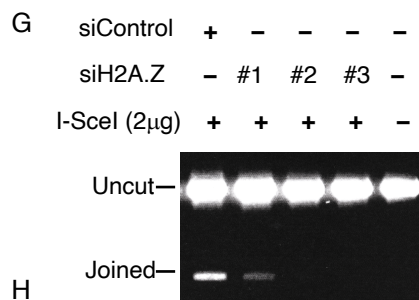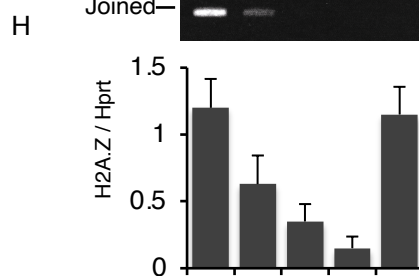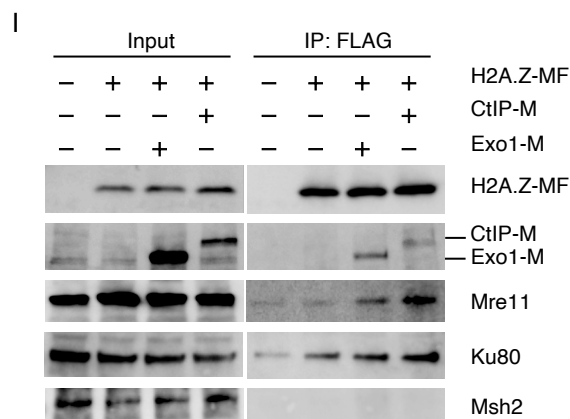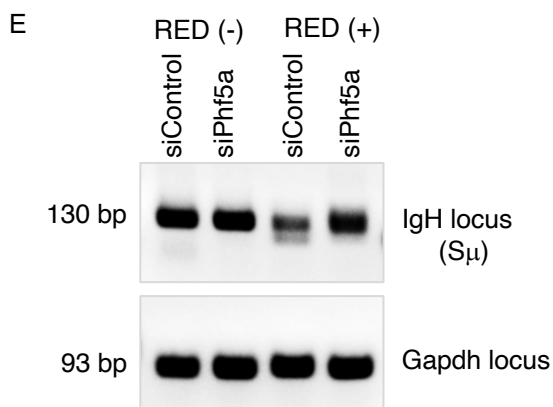

Appendix Figure S4

**Appendix Figure S4 : Phf5a and H2A.Z promote NHEJ and prevent DNA end resection. (A)** Phf5a is dispensable for homologous recombination (HR). Schematic diagram of the DR-GFP construct, which expresses GFP only after *I-SceI*-induced target site cleavage and DNA repair by HR. The *I-SceI* cleavage site (light blue vertical rectangle) and the donor template for homology-mediated repair were located in SceGFP and iGFP (dotted rectangle), respectively. **(B)** Percentage of GFP-positive cells assessed by FACS analysis after co-transfection of the *I-SceI*-expressing plasmid and the indicated siRNAs into GM7166VA cells (n=3, mean  $\pm$  sd; two-tailed unpaired Student's t-test; \*\*\*  $p \leq 0.001$ ). **(C)** Confirmation of Phf5a KD in the samples by qRT-PCR. **(D)** Schematic representation of DNA end resection assay. **(E)** Image of an agarose gel with PCR products obtained using genomic DNA isolated from wild type and Phf5a depleted CH12F3-2A cells. Prior to PCR, DNA was fragmented and left untreated or treated with target site cleaving enzyme (Restriction Endonuclease Digestion; RED-/+) . Following purification of the digested DNA, S $\mu$  (target) and Gapdh (loading control) locus specific PCR was performed. **(F-G)** Depletion of H2A.Z strongly impaired NHEJ as in the case of Phf5a depletion (Fig.4). NHEJ reporter line and assays are same as described in Fig.4B-D. **(H)** Confirmation of H2A.Z KD in the samples by qRT-PCR. (n=2, mean  $\pm$  sd). **(I)** NHEJ repair factors interact with H2A.Z. Myc-FLAG (MF) epitope-tagged H2A.Z was co-transfected with the indicated plasmids. An anti-FLAG antibody was used for the detection and immunoprecipitation of H2A.Z-MF. An anti-Myc antibody was used to detect Myc epitope-tagged Exo-1 (Exo1-M) and CtIP (CtIP-M) in the Western blots. Interactions were also verified by reciprocal co-IP (not shown).

| Ref seq              | ATTCGAATTCGGATCTAGGGATAA<br>TAAGCTTAAGCCTAGATCCC |                                                  | CCCTAGGATCCTTCCGGT<br>AATAGGGATCCTAGGAAGGCCA | Clone<br>no.                                 |
|----------------------|--------------------------------------------------|--------------------------------------------------|----------------------------------------------|----------------------------------------------|
| siControl            | ATTCGAATTCGGATCTAGGG                             | ATAAT                                            | CCCTAGGATCCTTCCGGT                           | 22                                           |
|                      | ATTCGAATTCGGATCTAGGG                             | ATTAT                                            | CCCTAGGATCCTTCCGGT                           | 20                                           |
|                      | ATTCGAATTCGGATCTAGGG                             | ATAT                                             | CCCTAGGATCCTTCCGGT                           | 4                                            |
|                      | ATTCGAATTCGGATCTAGGG                             | AT                                               | CCCTAGGATCCTTCCGGT                           | 9                                            |
|                      |                                                  |                                                  |                                              | 55                                           |
|                      | ATTCGAATTCGGATCTAGGG                             | In 6 bp                                          | ATTCGAATTCGGATCTAGGG                         | 1                                            |
|                      | ATTCGAATTCGGATCTAGGG                             | In 4 bp Δ1                                       | ATTCGAATTCGGATCTAGGG                         | 1                                            |
|                      |                                                  |                                                  | 2                                            |                                              |
| Ref seq              | ATTCGAATTCGGATCTAGGGATAA<br>TAAGCTTAAGCCTAGATCCC |                                                  | CCCTAGGATCCTTCCGGT<br>AATAGGGATCCTAGGAAGGCCA | Clone<br>no.                                 |
| siPhf5a              | ATTCGAATTCGGATCTAGGG                             | ATAAT                                            | CCCTAGGATCCTTCCGGT                           | 20                                           |
|                      | ATTCGAATTCGGATCTAGGG                             | ATTAT                                            | CCCTAGGATCCTTCCGGT                           | 7                                            |
|                      | ATTCGAATTCGGATCTAGGG                             | ATAT                                             | CCCTAGGATCCTTCCGGT                           | 3                                            |
|                      | ATTCGAATTCGGATCTAGGG                             | AT                                               | CCCTAGGATCCTTCCGGT                           | 2                                            |
|                      |                                                  |                                                  |                                              | 32                                           |
|                      | ATTCGAATTCGGATCTAGGG                             | In 4 bp                                          | ATTCGAATTCGGATCTAGGG                         | 1                                            |
|                      | ATTCGAATTCGGATCTAGGG                             | In 119 bp                                        | ATTCGAATTCGGATCTAGGG                         | 1                                            |
|                      | ATTCGAATTCGGATCTAGGG                             | In 1 bp Δ11                                      | ATTCGAATTCGGATCTAGGG                         | 1                                            |
|                      | ATTCGAATTCGGATCTAGGG                             | In 25 bp Δ50                                     | ATTCGAATTCGGATCTAGGG                         | 1                                            |
|                      | ATTCGAATTCGGATCTAGGG                             | In 36 bp Δ50                                     | ATTCGAATTCGGATCTAGGG                         | 1                                            |
|                      | ATTCGAATTCGGATCTAGGG                             | In 2 bp Δ4                                       | ATTCGAATTCGGATCTAGGG                         | 1                                            |
|                      | ATTCGAATTCGGATCTAGGG                             | In 5 bp Δ4                                       | ATTCGAATTCGGATCTAGGG                         | 1                                            |
|                      | ATTCGAATTCGGATCTAGGG                             | In 15 bp Δ14                                     | ATTCGAATTCGGATCTAGGG                         | 1                                            |
|                      | ATTCGAATTCGGATCTAGGG                             | In 11 bp Δ30                                     | ATTCGAATTCGGATCTAGGG                         | 1                                            |
|                      | ATTCGAATTCGGATCTAGGG                             | In 3 bp Δ4                                       | ATTCGAATTCGGATCTAGGG                         | 1                                            |
|                      | ATTCGAATTCGGATCTAGGG                             | In 4 bp Δ12                                      | ATTCGAATTCGGATCTAGGG                         | 1                                            |
|                      | ATTCGAATTCGGATCTAGGG                             | In 1 bp Δ5                                       | ATTCGAATTCGGATCTAGGG                         | 1                                            |
|                      | ATTCGAATTCGGATCTAGGG                             | In 12 bp Δ75                                     | ATTCGAATTCGGATCTAGGG                         | 1                                            |
|                      |                                                  |                                                  |                                              | 13                                           |
|                      | Ref seq                                          | ATTCGAATTCGGATCTAGGGATAA<br>TAAGCTTAAGCCTAGATCCC |                                              | CCCTAGGATCCTTCCGGT<br>AATAGGGATCCTAGGAAGGCCA |
| siH2A.Z              | ATTCGAATTCGGATCTAGGG                             | ATAAT                                            | CCCTAGGATCCTTCCGGT                           | 10                                           |
|                      | ATTCGAATTCGGATCTAGGG                             | ATTAT                                            | CCCTAGGATCCTTCCGGT                           | 19                                           |
|                      | ATTCGAATTCGGATCTAGGG                             | ATAT                                             | CCCTAGGATCCTTCCGGT                           | 3                                            |
|                      | ATTCGAATTCGGATCTAGGG                             | AT                                               | CCCTAGGATCCTTCCGGT                           | 2                                            |
|                      |                                                  |                                                  |                                              | 34                                           |
|                      | ATTCGAATTCGGATCTAGGG                             | In 8 bp ~                                        | ATTCGAATTCGGATCTAGGG                         | 1                                            |
|                      | ATTCGAATTCGGATCTAGGG                             | In 125 bp ~                                      | ATTCGAATTCGGATCTAGGG                         | 1                                            |
|                      | ATTCGAATTCGGATCTAGGG                             | In 154 bp ~                                      | ATTCGAATTCGGATCTAGGG                         | 1                                            |
|                      | ATTCGAATTCGGATCTAGGG                             | In 158 bp ~                                      | ATTCGAATTCGGATCTAGGG                         | 1                                            |
|                      | ATTCGAATTCGGATCTAGGG                             | In 32 bp Δ76                                     | ATTCGAATTCGGATCTAGGG                         | 1                                            |
|                      | ATTCGAATTCGGATCTAGGG                             | In 36 bp Δ352                                    | ATTCGAATTCGGATCTAGGG                         | 1                                            |
|                      | ATTCGAATTCGGATCTAGGG                             | In 127 bp Δ353                                   | ATTCGAATTCGGATCTAGGG                         | 1                                            |
|                      | ATTCGAATTCGGATCTAGGG                             | In 2 bp Δ9                                       | ATTCGAATTCGGATCTAGGG                         | 1                                            |
|                      | ATTCGAATTCGGATCTAGGG                             | In 8 bp Δ10                                      | ATTCGAATTCGGATCTAGGG                         | 1                                            |
|                      | ATTCGAATTCGGATCTAGGG                             | In 8 bp Δ9                                       | ATTCGAATTCGGATCTAGGG                         | 2                                            |
|                      | ATTCGAATTCGGATCTAGGG                             | In 17 bp Δ17                                     | ATTCGAATTCGGATCTAGGG                         | 1                                            |
| ATTCGAATTCGGATCTAGGG | In 3 bp Δ4                                       | ATTCGAATTCGGATCTAGGG                             | 1                                            |                                              |
|                      |                                                  |                                                  | 13                                           |                                              |

**Appendix Figure S5 : Loss of Phf5a or H2A.Z similarly affected recombination junctions.** Phf5a or H2A.Z KD increases the frequency of insertions and deletions at the repair junctions. Extended analysis of the NHEJ-mediated repair of *I-SecI*-cleaved junctions. Genomic DNA was isolated from cells transfected with the indicated siRNA, and the repaired junctions were PCR amplified as described in Fig.4. Due to limited amounts of material, the PCR-amplified products were combined from multiple experiments prior to cloning. The total number of clones analyzed in the control, Phf5a KD, and H2A.Z KD samples was 57, 45, and 47, respectively.

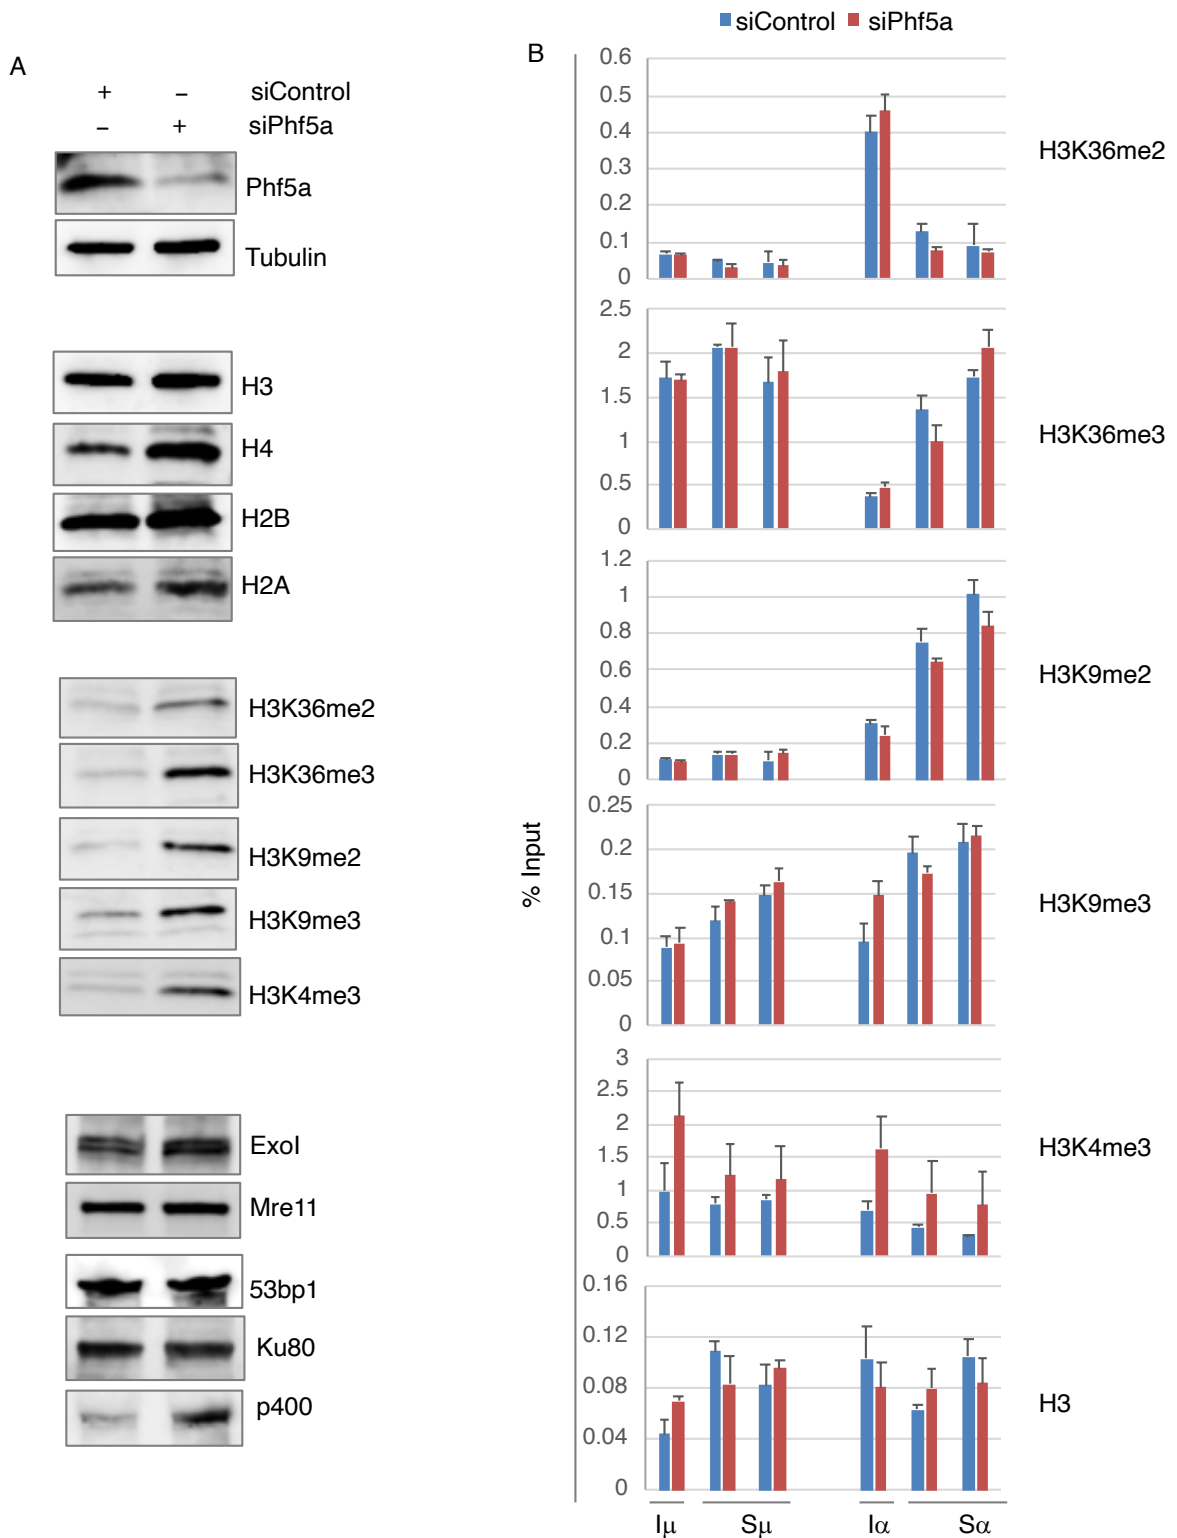

**Appendix Figure S6 : Expression of histones and histone-PTMs upon Phf5a depletion. (A)** Western blots of whole-cell-extracts from stimulated CH12F3-2A cells transfected with siControl or siPhf5a. The antibodies used for immunoblotting are indicated next to the respective blot. **(B)** ChIP analyses of H3 and various H3K methylation for IgH locus using chromatin extract from stimulated CH12F3-2A cells as described in A. The data are the means  $\pm$  sd from two experiments.

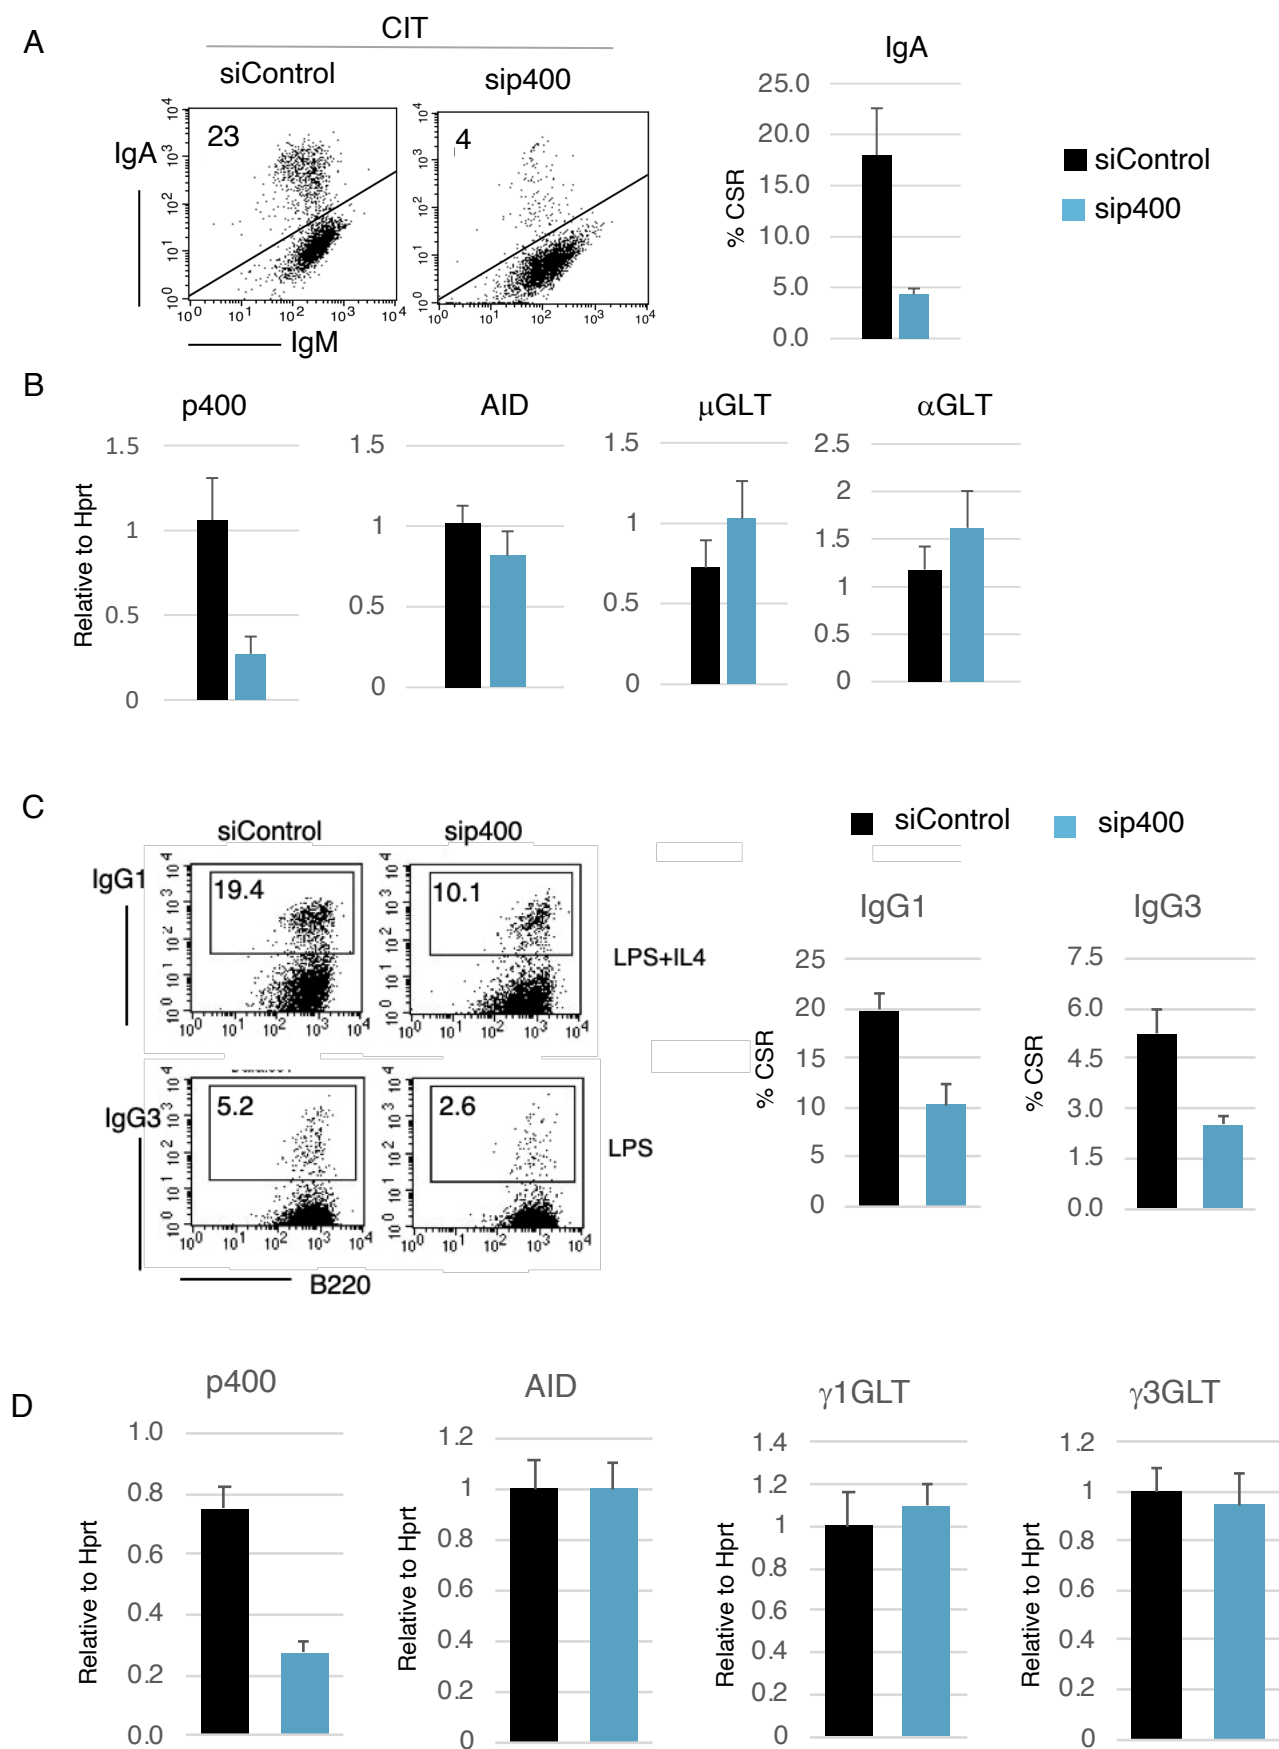

Appendix Figure S7

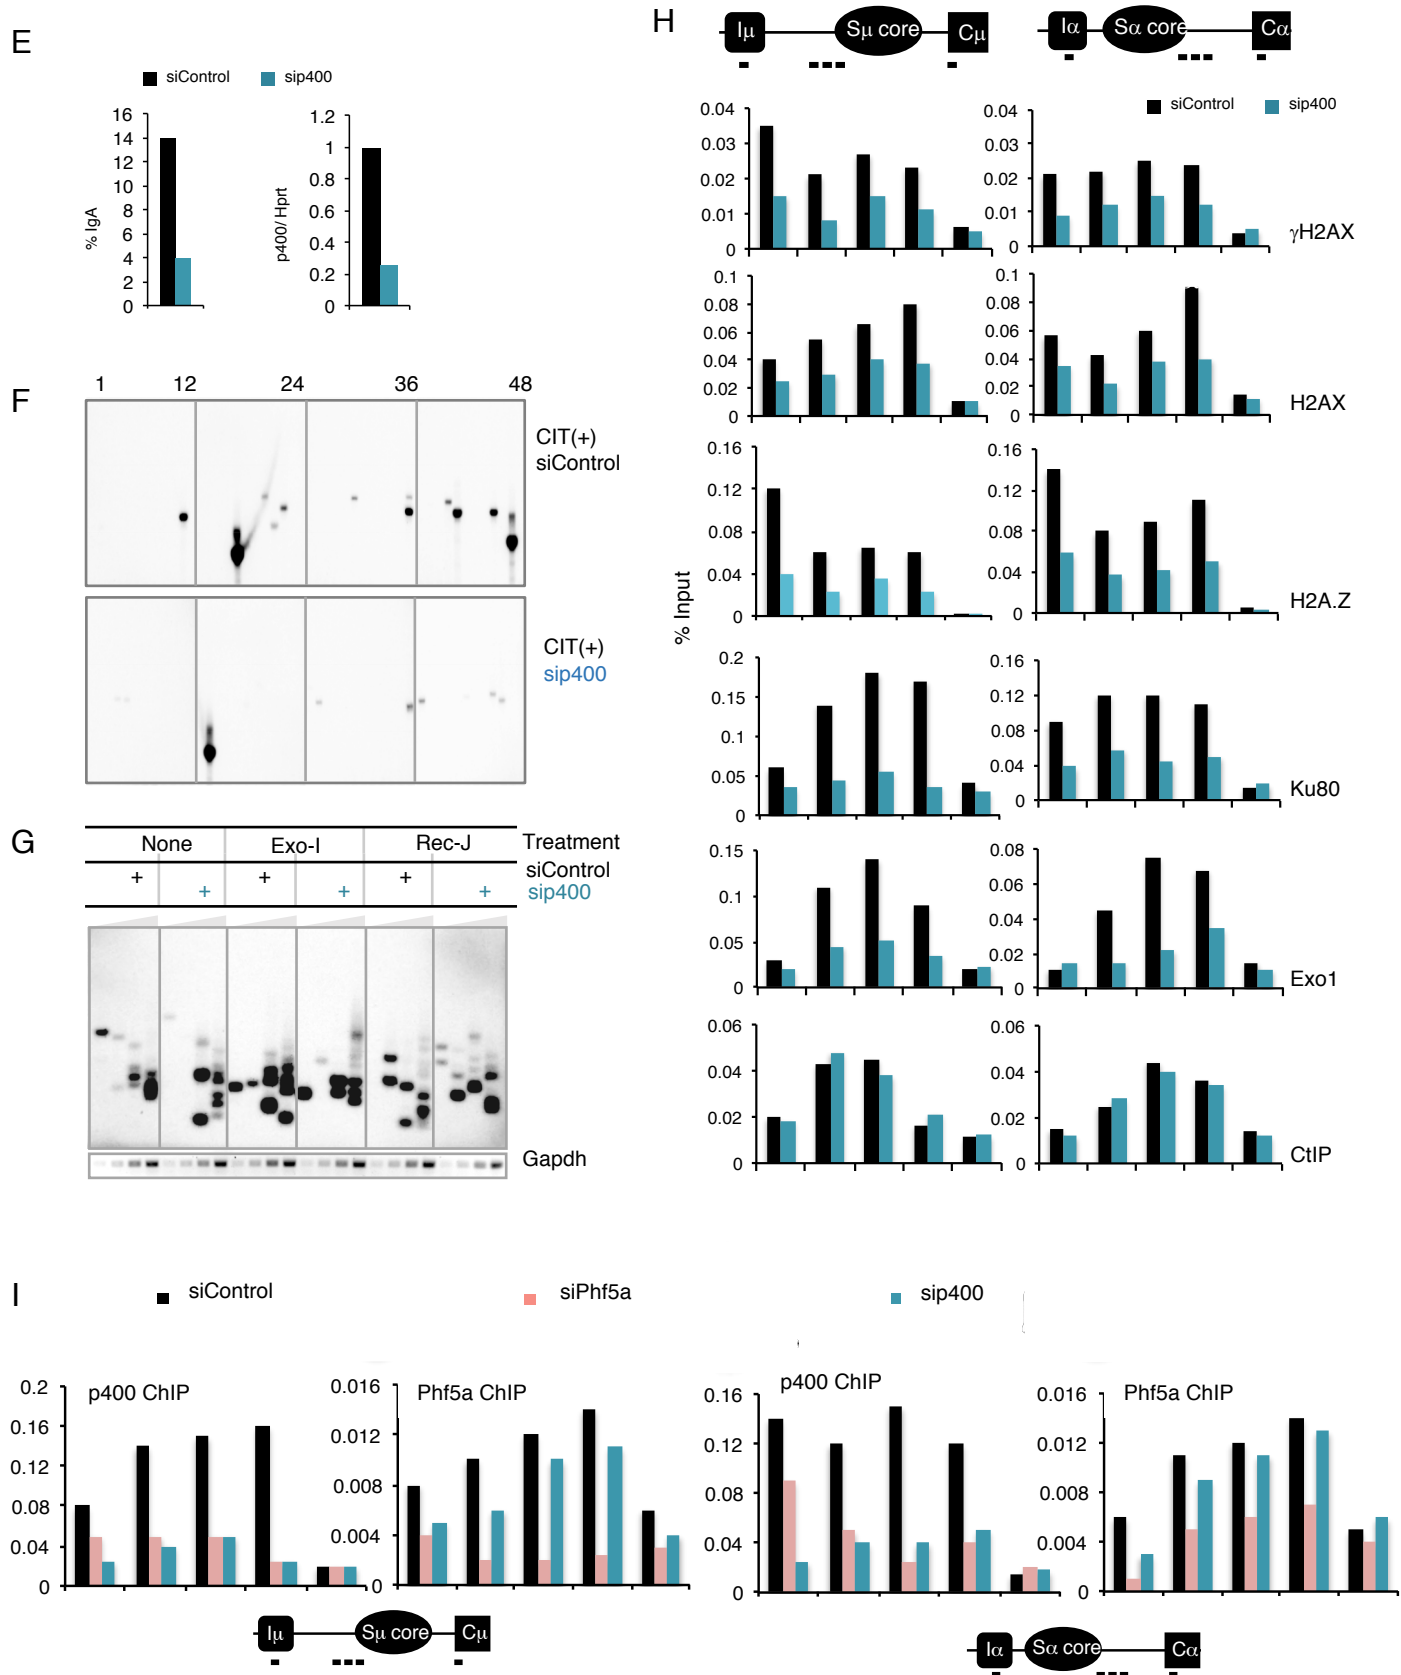

Appendix Figure S7



**Appendix Figure S7: Knockdown of p400 affects AID-induced genomic instability similar to Phf5a KD.** (A-B) Knockdown of p400 in CH12F3-2A cells impaired CSR. The cells were transfected with the indicated siRNAs, and IgA switching was examined 24h after CIT stimulation. Knockdown efficiency of p400, and transcription of AID and GLTs were examined by qRT-PCR (n=3, mean  $\pm$  sd). (C-D) Knockdown of p400 in primary B cells, and CSR and transcript analyses. The experimental design and the siControl sample are the same as in Appendix Fig.S2B and C. Purified splenic B cells were transfected with siRNAs indicated and stimulated with LPS or LPS+IL4 for IgG3 and IgG1 switching, respectively. (C) A representative FACS profile as well as the summary of 3 independent experiments is shown (mean  $\pm$  sd). (D) Quantitative RT-PCR analysis of p400, AID and GLTs. (E-F) CSR, Translocation, DNA break and ChIP analyses in control and p400 depleted CH23F3-2A cells.(E) Examination of CSR and KD efficiency in siControl and sip400 treated CH12F32A cells. (F) Representative Southern hybridization blots of the IgH/cMyc translocation assay using genomic DNA isolated from siControl- and sip400-treated cells. The data were combined from two independent experiments. (G) DNA DSB detection by LMPCR assay. Genomic DNA was isolated from siControl- and sip400-transfected cells stimulated 24 h with CIT. Prior to linker ligation, the DNA was either left untreated (None) or treated with ExoI or RecJ to repair any resected DNA ends. The linker-ligated DSBs were PCR amplified in combination with site-specific primer and a linker-primer, followed by hybridization with an S $\mu$ -specific probe. (H) ChIP analysis of the indicated H2A family histones and DNA repair proteins before and after p400 depletion in CH12F3-2A cells. Locations of ChIP PCR products at the IgH locus are indicated as small horizontal bars in the scheme (Top). (I) ChIP analysis of p400 and Phf5a in Phf5a- and p400-depleted cells. Locations of ChIP PCR products in the IgH locus are indicated as small horizontal bars in the scheme (bottom). The data shown (D, E) are the mean of two independent experiments.

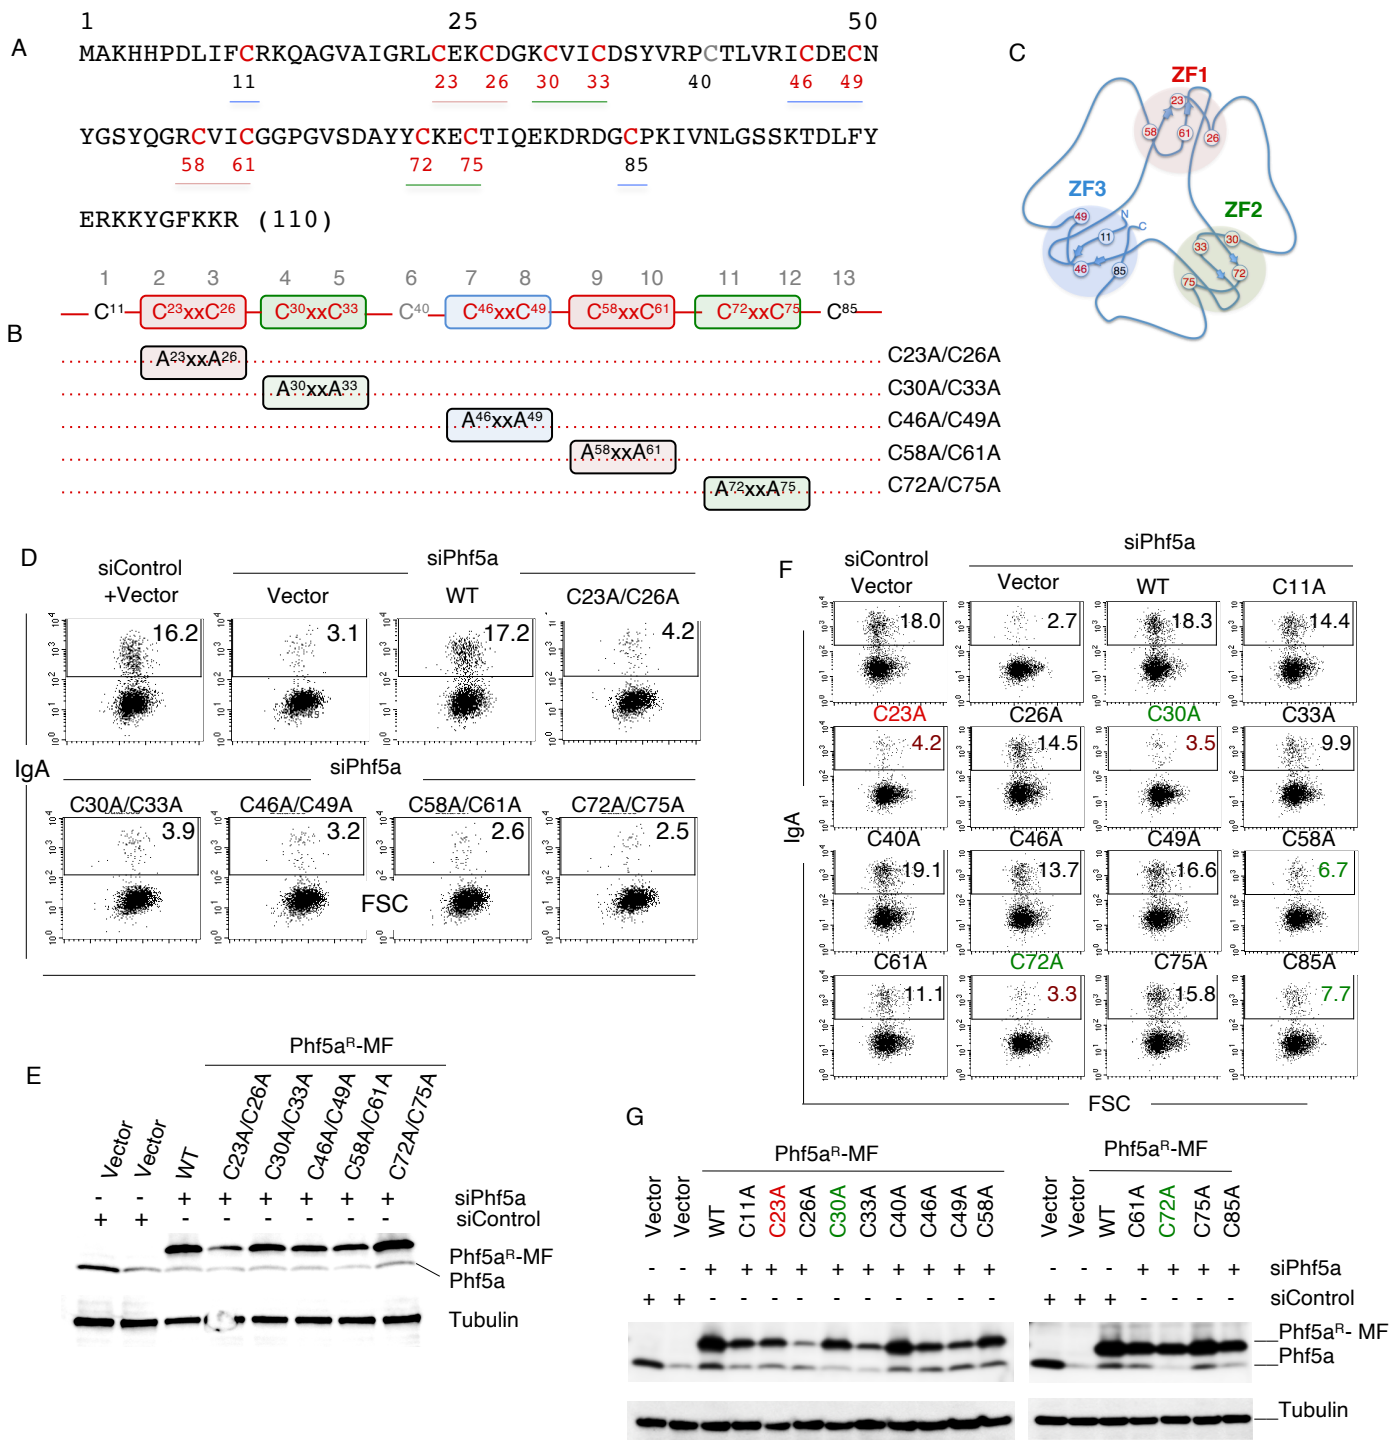

**Appendix Figure S8 : Identification of loss-of-CSR function Phf5a mutant by alanine scanning mutagenesis.** (A) Amino acid sequence of mouse Phf5a with color coded Cys residues involved in zinc finger formation as shown in Fig.7A. (B) The mutagenesis [Cys(C) to Ala(A)] scheme of the five CxxC motifs, which are boxed and color-coded as underlined in A. Each dotted line with AxxA represents the respective CxxC motif mutant. The superscript indicates the number of each Cys residue in the amino acid sequence. (C) Diagram of the predicted triquetra knot structure of Phf5a involving the three ZFs. The illustration was adapted from the structure of the yeast Phf5a homologue, Rds3. (D) Analysis of CSR complementation efficiency of the CxxC mutants. Representative FACS profile of IgA switching in CH12F3-2A cells transfected with the indicated siRNAs along with an empty vector or a Phf5A expression plasmid (Phf5a<sup>R</sup>-MF). (E) Confirmation of Phf5a depletion and expression of various CxxC motif mutants. Phf5a and Phf5a<sup>R</sup>-MF indicated the expression of endogenous and exogenous Phf5a, respectively. (F) Analysis of CSR complementation efficiency of the single Cys mutants [Cys(C) to Ala(A)]. Representative FACS profile of IgA switching in CH12F3-2A cells transfected with the indicated siRNAs along with an empty vector or a Phf5A expression plasmid (Phf5a<sup>R</sup>-MF). (G) Confirmation of the Phf5a depletion and expression of wild-type and mutant Phf5a<sup>R</sup>-MF.

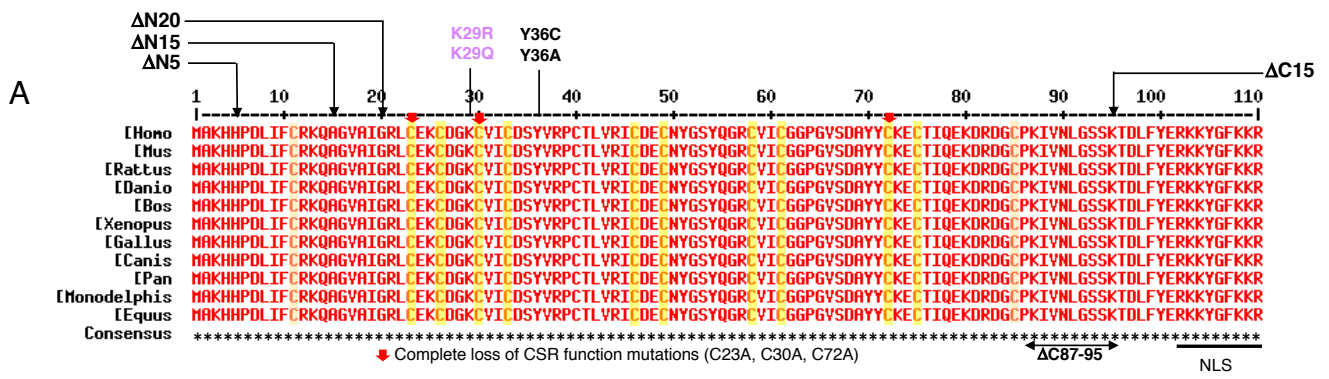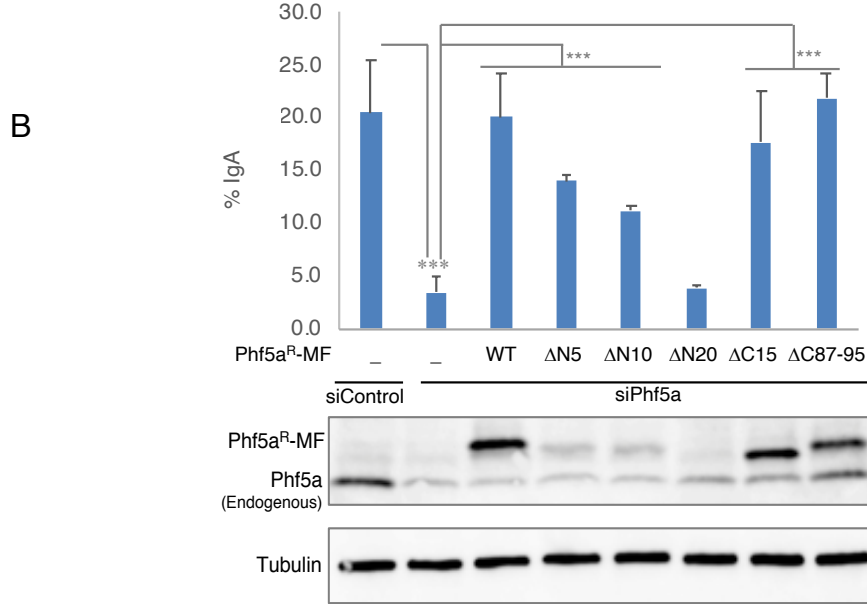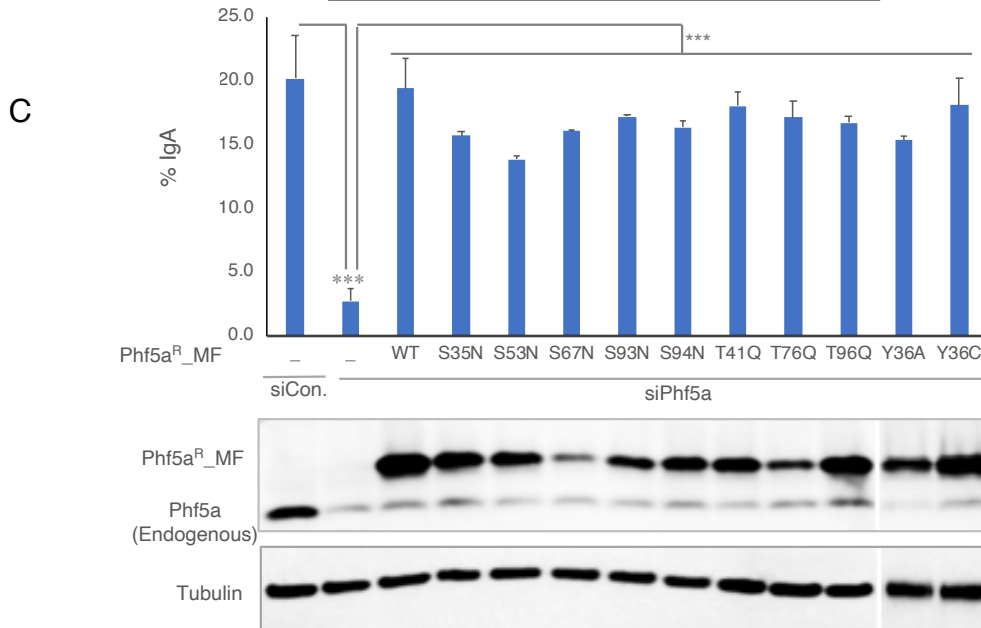

**Appendix Figure S9. Phf5a mutants that do not impair CSR.** (A) Multiple alignments of Phf5a proteins from different species. Position of various deletions generated in DN and DC mutants are indicated at the N- and C-terminus, respectively. Point mutations generated at K29 or at Y36 are also indicated. The three read arrowheads show the three critical Cys residues essential for CSR. (B) CSR complementation assay in CH12F3-2A cells, using indicated deletion mutants. Immunoblotting below the plots show the Phf5a KD efficiency and the expression profile of individual Phf5a mutants. (C) CSR complementation assay in CH12F3-2A cells using point mutants generated at the indicated S/T/Y residue. Immunoblotting below the plots show the Phf5a KD efficiency and the expression profile of individual Phf5a mutants.

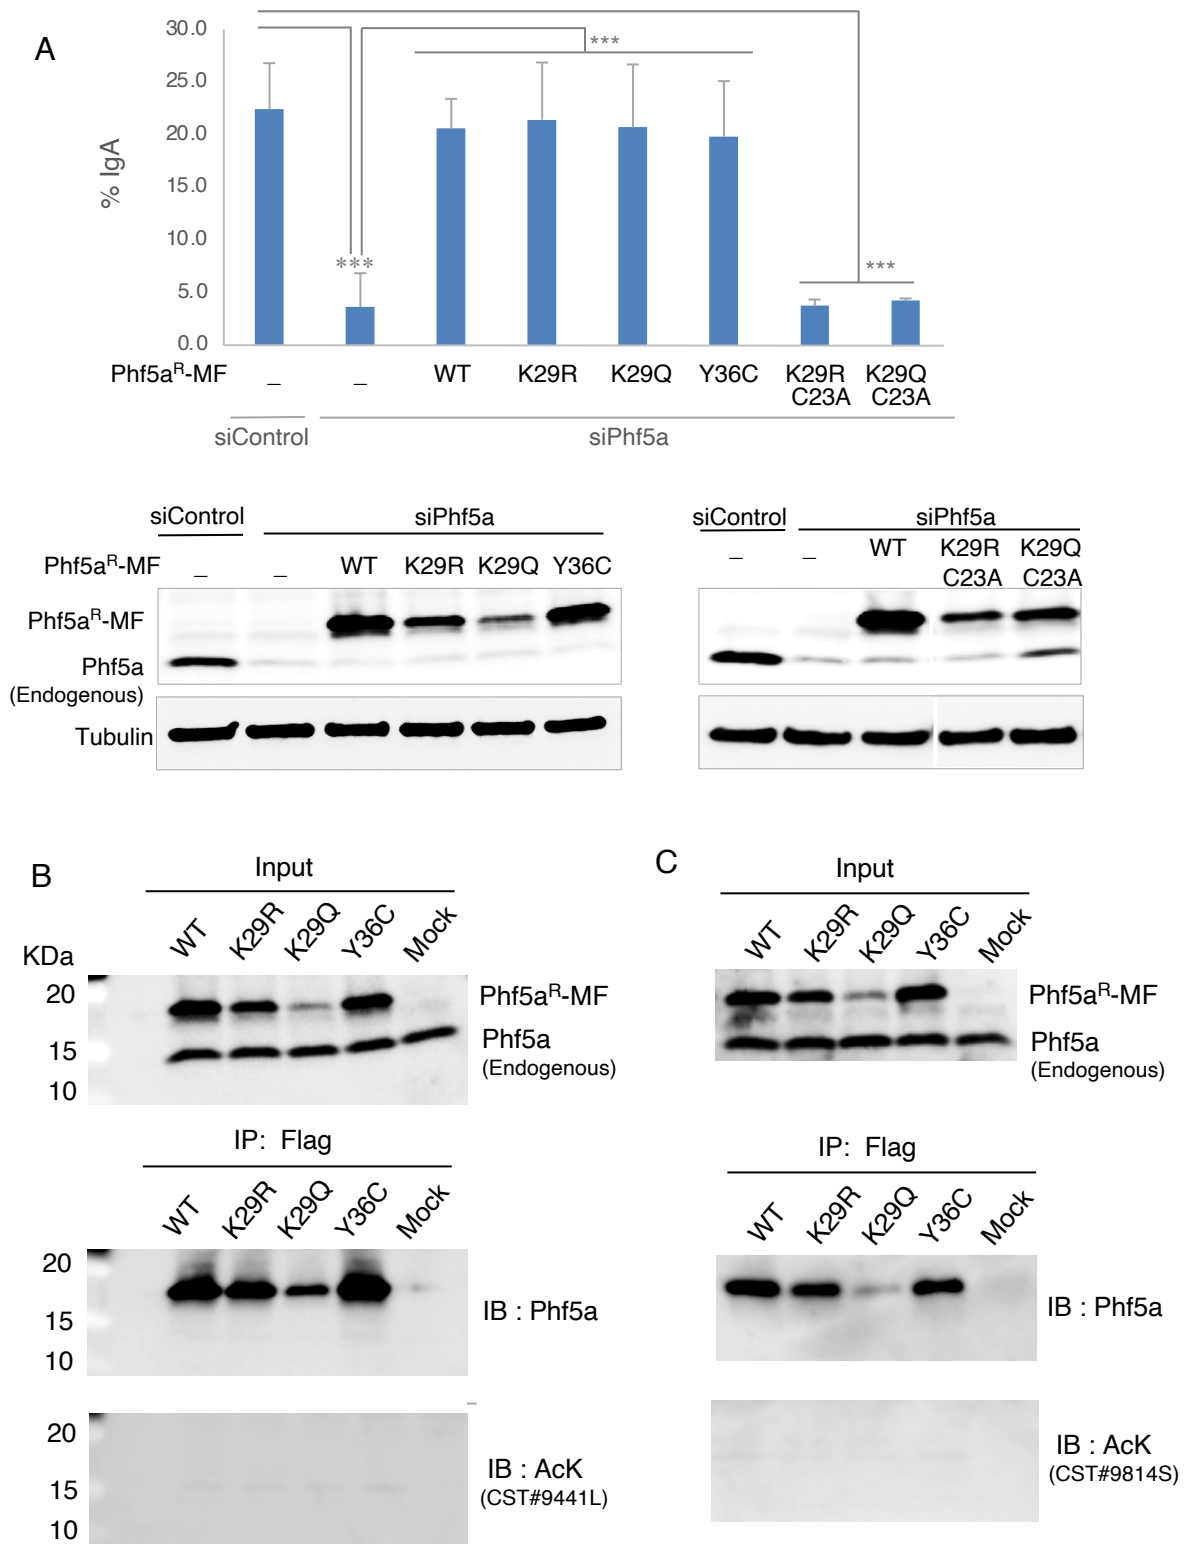

**Appendix Figure S10 : Phf5a K29 acetylation is dispensable for CSR.** (A) CSR complementation assay in CH12F3-2A cells using indicated point mutants. K29R/Q and Y36C mutants were described (mean  $\pm$  sd; two-tailed unpaired Student's t-test; \*\*\*  $p \leq 0.001$ ). Immunoblotting below the plots show the Phf5a KD efficiency and the expression of the WT and Phf5a mutants transfected. (B-C) Anti-Flag IP of WT and Mutant Phf5a, followed western blot with indicated antibodies to detect Phf5a acetylation.

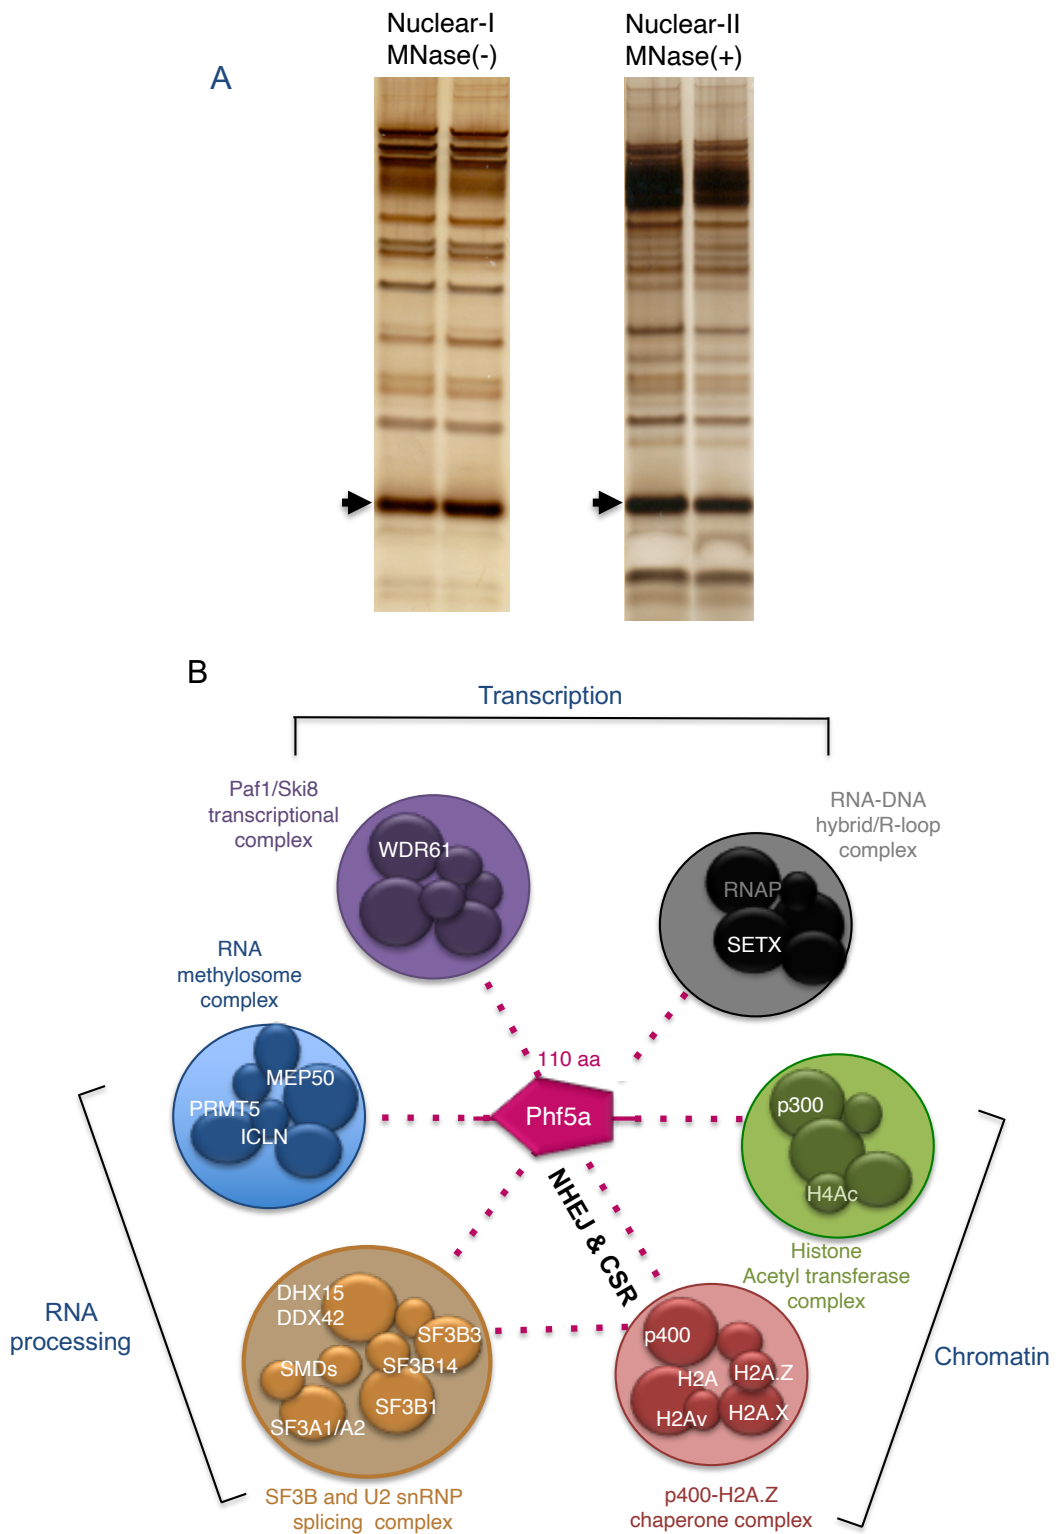

**Appendix Figure S11 : Identification of Phf5a-interacting proteins from CH12F3-2A cells. (A)** Phf5a-MF was expressed in CH12F3-2A cells, and the Phf5a-MF was IPed by anti-Flag. Silver stained gel shows the Phf5a-associated proteins co-immunoprecipitated from the nuclear extracts with or without micrococcal nuclease (MNase) treatment. The arrowhead indicates the bait protein, Phf5a-MF. Proteins identified by MS analysis were shortlisted in Table S1. **(B)** Interaction of Phf5a with various proteins were grouped to show its interaction with multi-protein chromatin complexes. This study, for the first time, shows that Phf5a is required for NHEJ and CSR (bold), which is directly linked to H2A variant regulation through p400 chaperone complex. The interaction/crosstalk among Phf5a, p400 and U2SnRNP are indicated by three dotted lines.

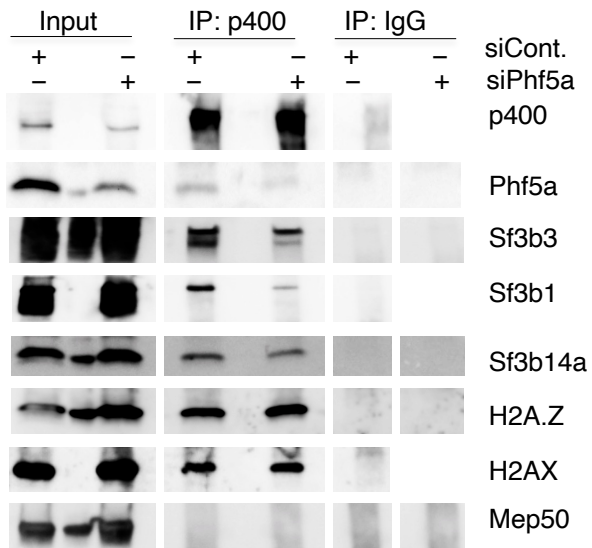

**Appendix Figure S12 : Phf5a KD weakens the interaction of p400 with Sf3b subunits but not with H2A.Z or H2AX.** Representative western blot analysis of the interacting proteins co-immunoprecipitated with p400. Nuclear extract was prepared from CH12F3-2A cells transfected with the indicated siRNAs and stimulated with CIT for 24 h. Anti-p400 and IgG IP were performed, followed by immunoblot analysis of the IPed products

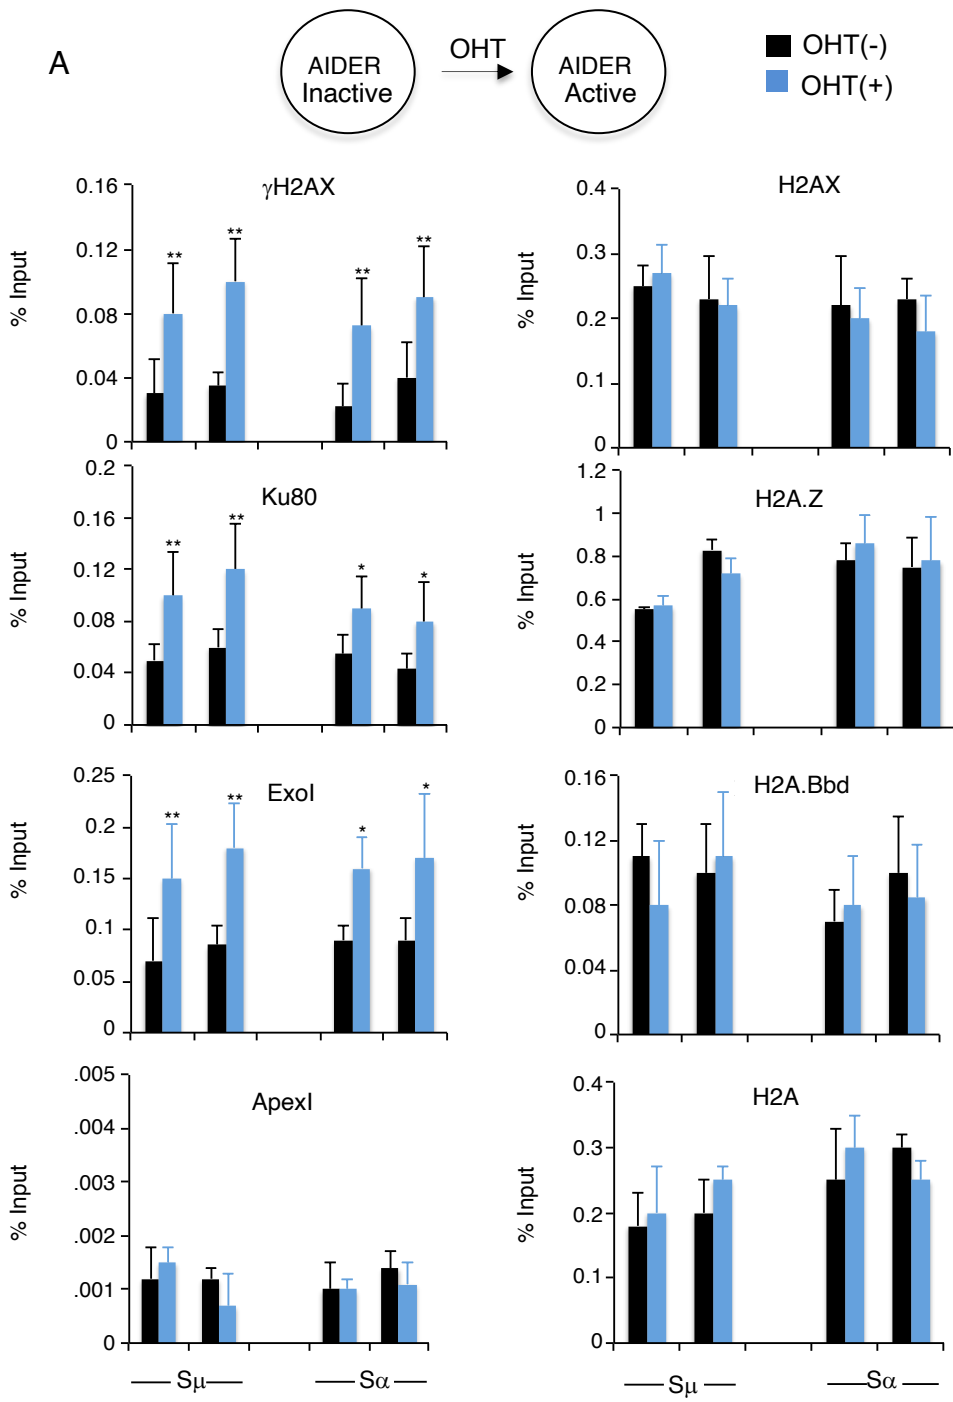

**Appendix Figure S13**

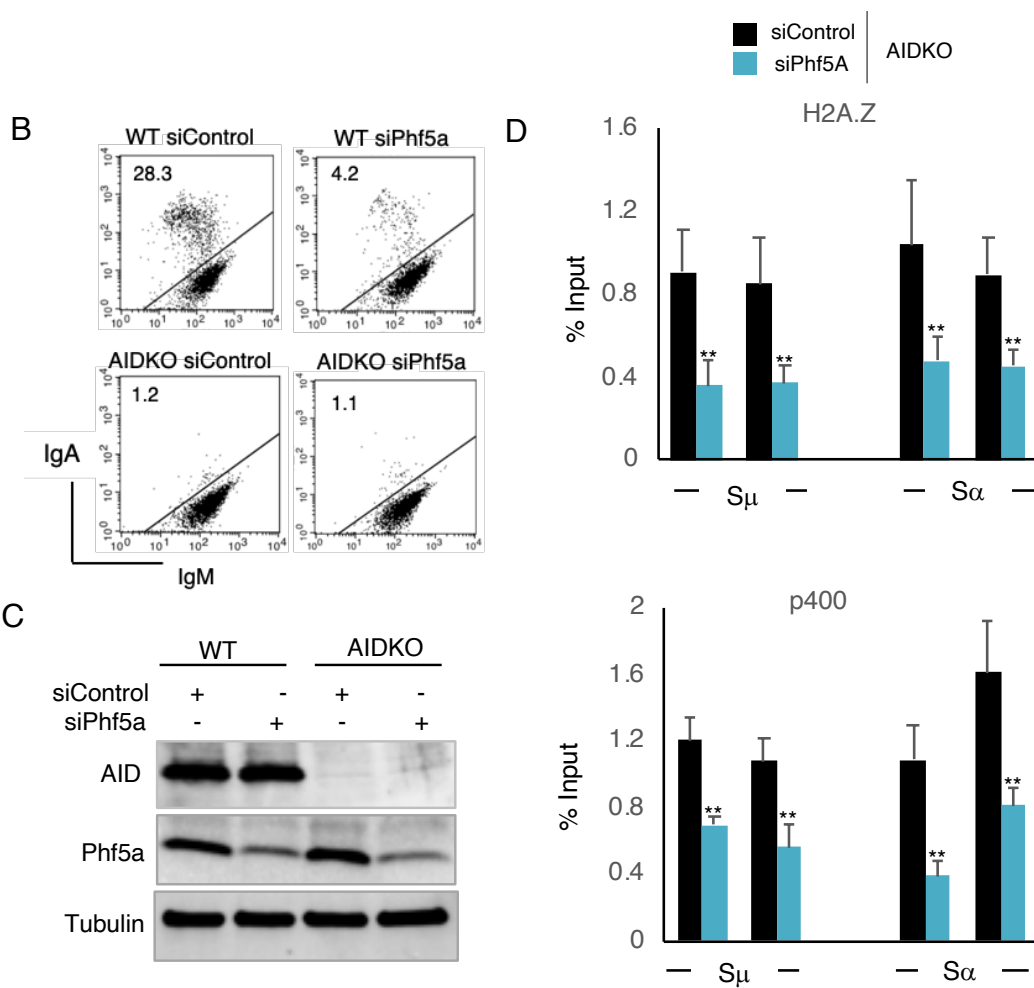

**Appendix Figure S13 : AID expression does not impact IgH locus H2A.Z regulation. (A)** Activation of AID induced accumulation of  $\gamma$ H2AX, Ku80, and Exo1 but not of H2AX, H2A.Z, H2A.Bbd, or H2A at the IgH locus. CH12F3-2A cells expressing AIDER (AID fused with ER) were stimulated with tamoxifen (OHT) to activate AID for 24 h and then subjected to IgH locus-specific ChIP analysis for the indicated proteins. Two pairs of PCR primers were used to examine the S $\mu$ - and S $\alpha$ -specific ChIP enrichment (n=2; mean  $\pm$  sd). **(B)** Representative FACS profiles of IgM to IgA switching in WT (AID<sup>+/+</sup>) and AIDKO (AID<sup>-/-</sup>) CH12F3-2A cells transfected with siRNAs as indicated. Numbers inside the plots indicate % IgA 24 h after CIT stimulation. **(C)** Western blots of AID, Phf5a and Tubulin. **(D)** Switch region ChIP analysis with indicated antibodies in AIDKO transfected with siControl or siPhf5a. Data presented were compiled from 3 experiments (mean  $\pm$  sd; two-tailed unpaired Student's t-test; \*\*p  $\leq$  0.01).



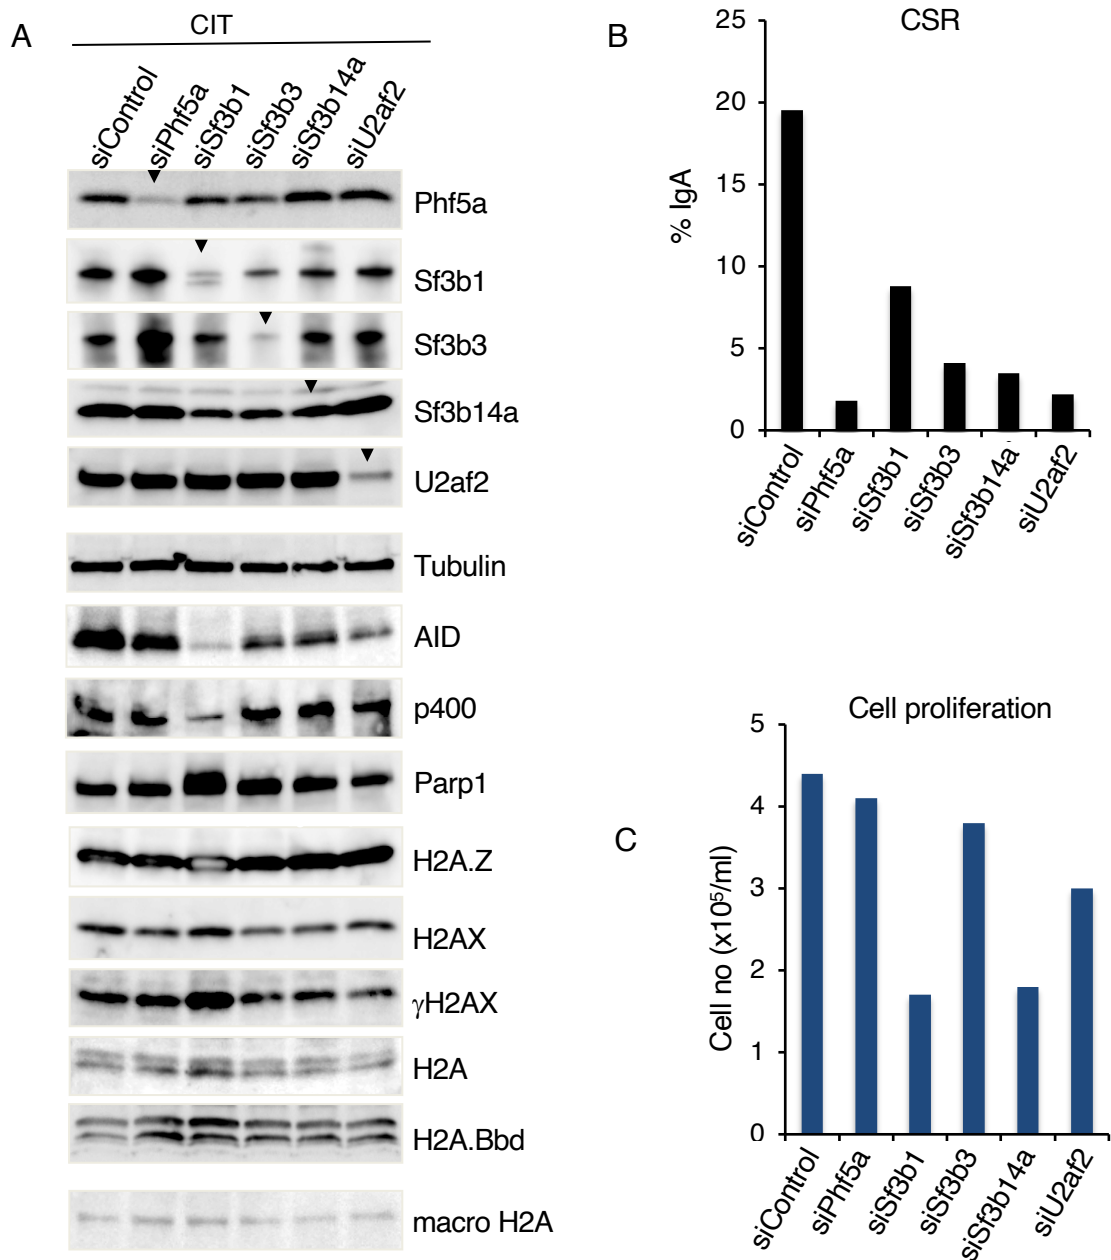

**Appendix Figure S14 : Knockdown of U2snRNP subunits reduced AID expression and CSR.** (A) Confirmation of KD of the indicated spliceosomal subunits in CH12F3-2A cells by Western blot analyses. The expression of several other proteins, including AID, H2A family members, and DNA repair-associated proteins were examined. Except Phf5a, KD of all the other spliceosomal subunits reduced the expression of AID. Sf3b1 KD had the strongest inhibitory effect on the AID and p400 expression. (B) IgA switching of CH12F3-2A cells transfected with the indicated siRNA and stimulated by CIT for 24 h. (C) KD of Sf3b1 and Sf3b14a impaired cell proliferation. The data plotted are mean of 2 independent experiments.

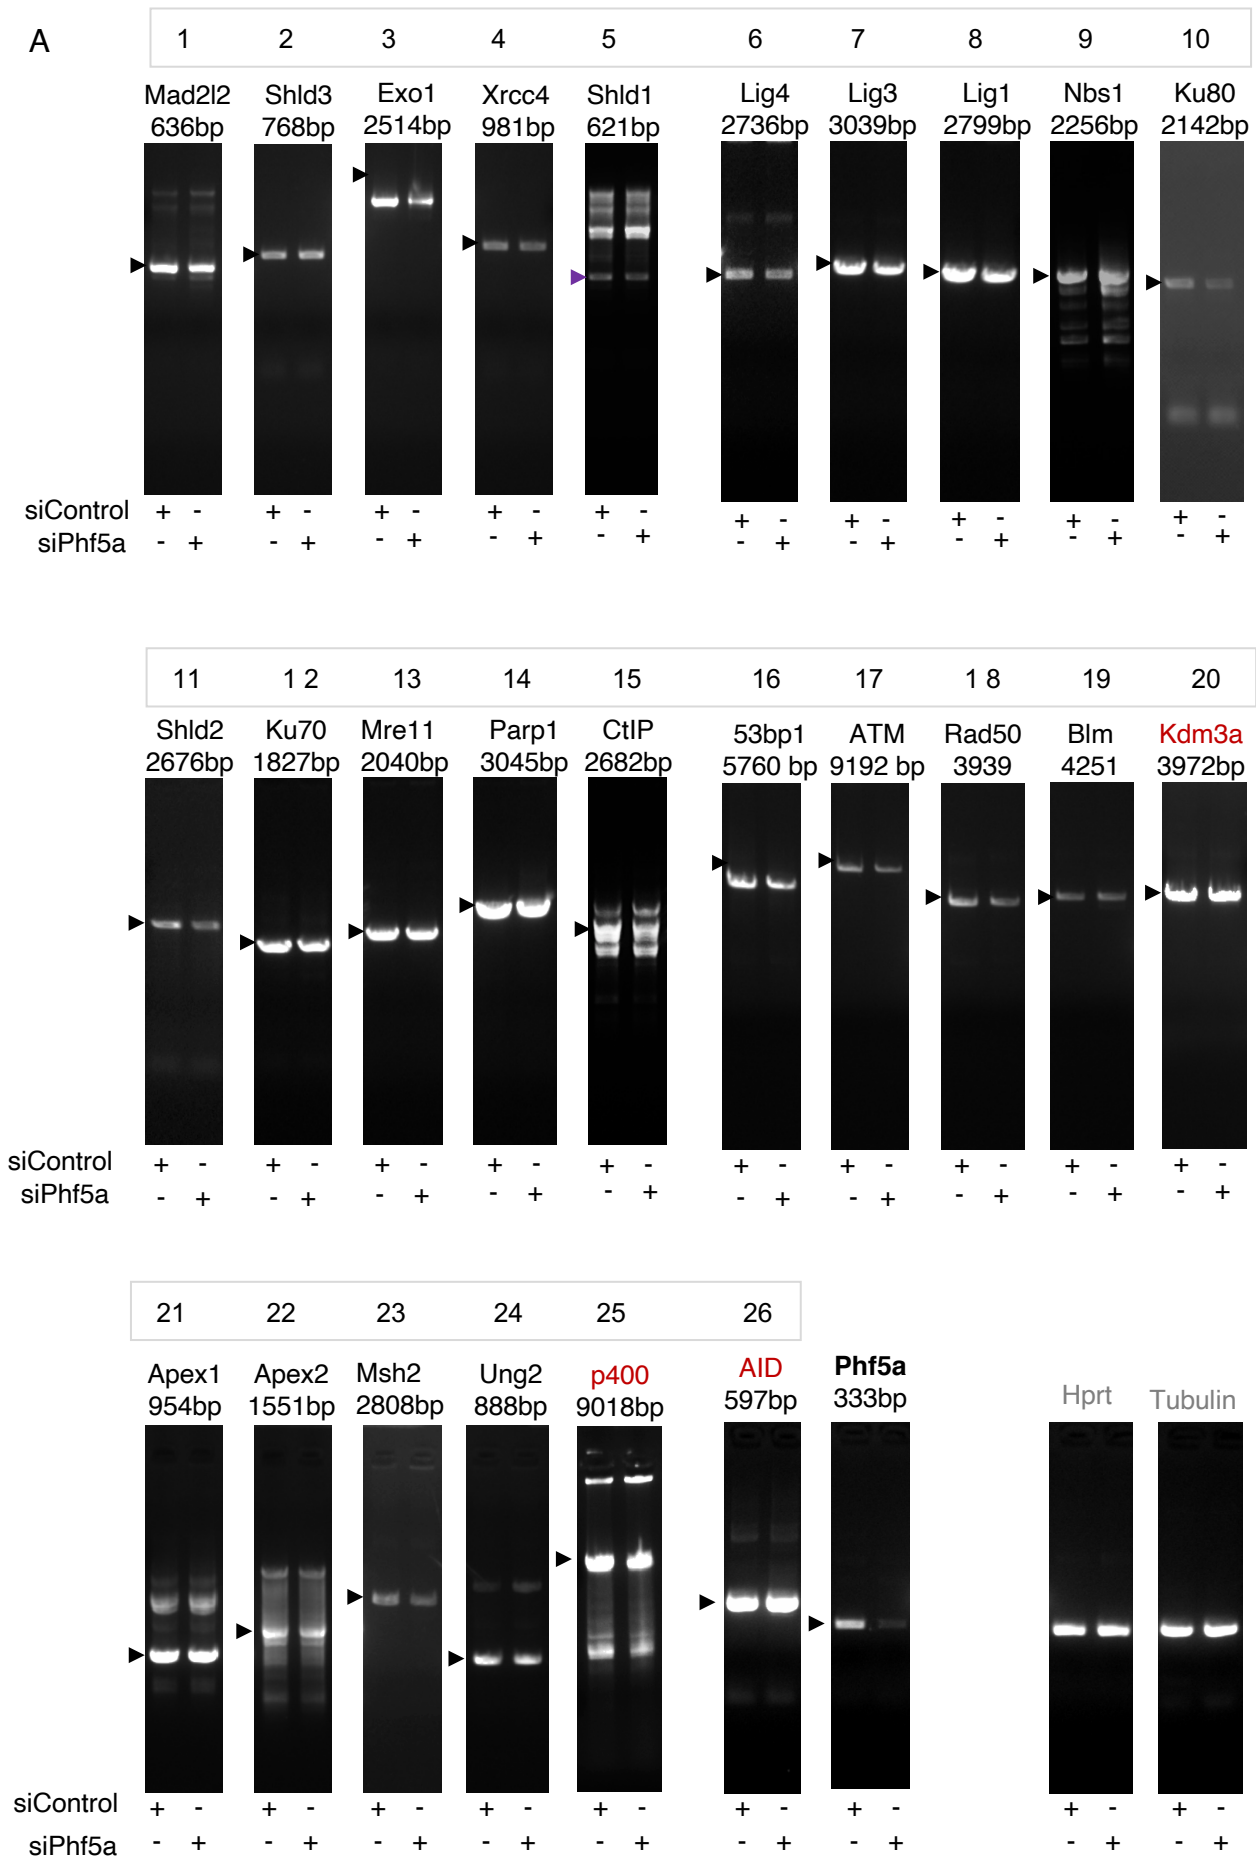

Appendix Figure S15

**B**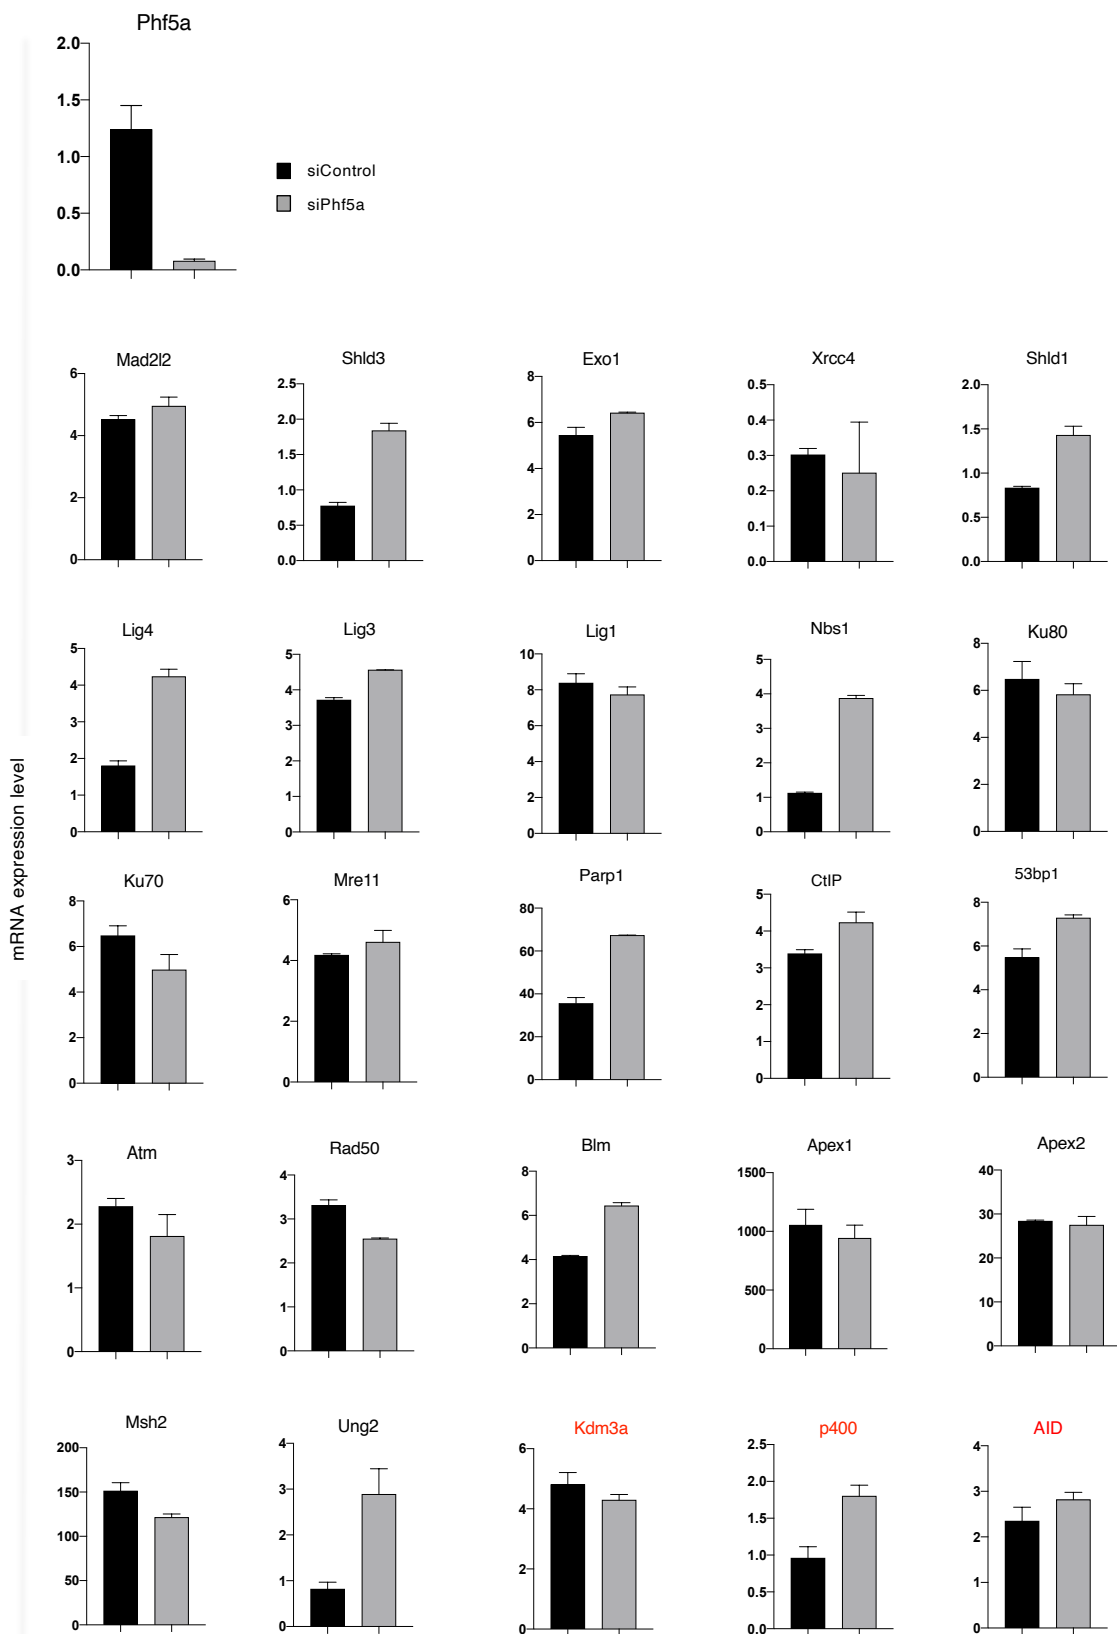**Appendix Figure S15 continued**

**Appendix Figure S15 : Phf5a depletion did no inhibit expression of genes important for CSR.** (A) RT-PCR of full-length coding region of 26 genes including CSR associated DNA repair genes. The RNA was isolated from siControl and siPhf5a treated CH12F3-2A cells stimulated for CSR. The three genes, Kdm3a, p400, and AID are color coded to separate them from the DNA repair genes. Knockdown of Phf5a (**bold text**) was confirmed, which was shown along with two housekeeping genes (Gray text) in the lower panel. PCR condition was described in the Method. (B) Quantitative RT-PCR analysis of selected DNA repair genes including Kdm3a, p400 and AID. The data was generated using RNA isolated from stimulated CH12F3-2A cells transfected with siControl or siPhf5a; knockdown efficiency of Phf5a was shown on the top. A representative data was shown with the means of technical replicates  $\pm$  sem.

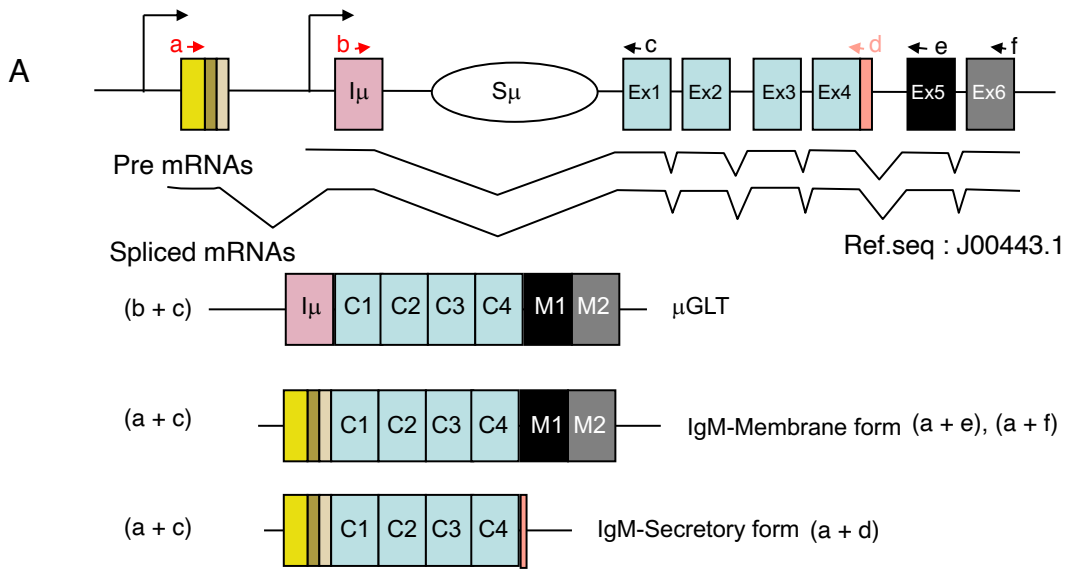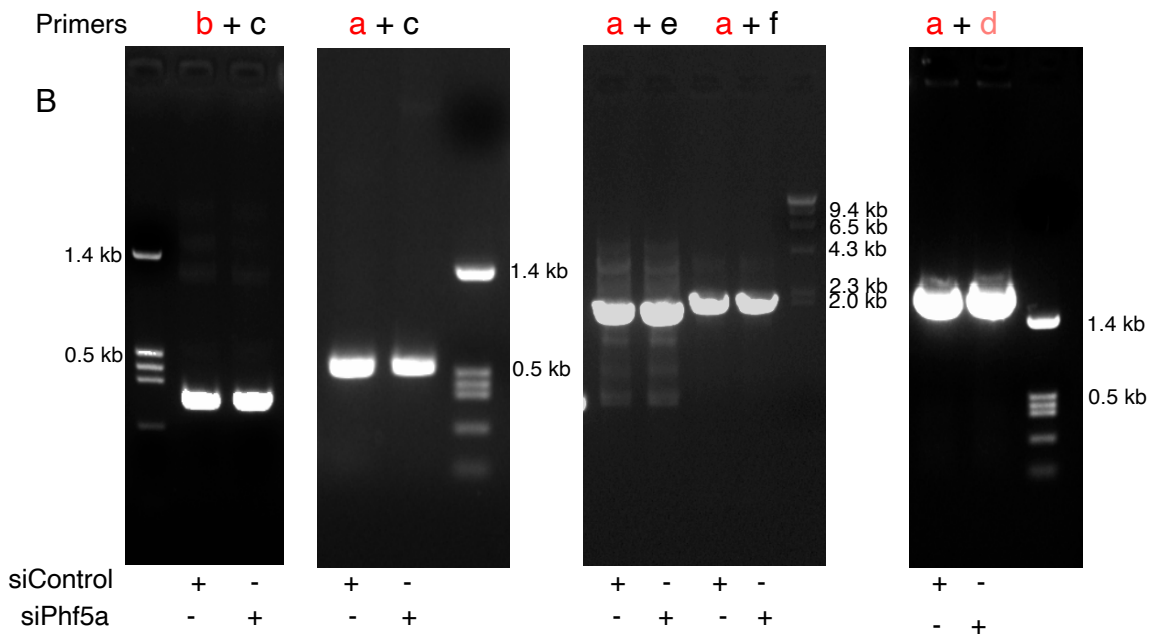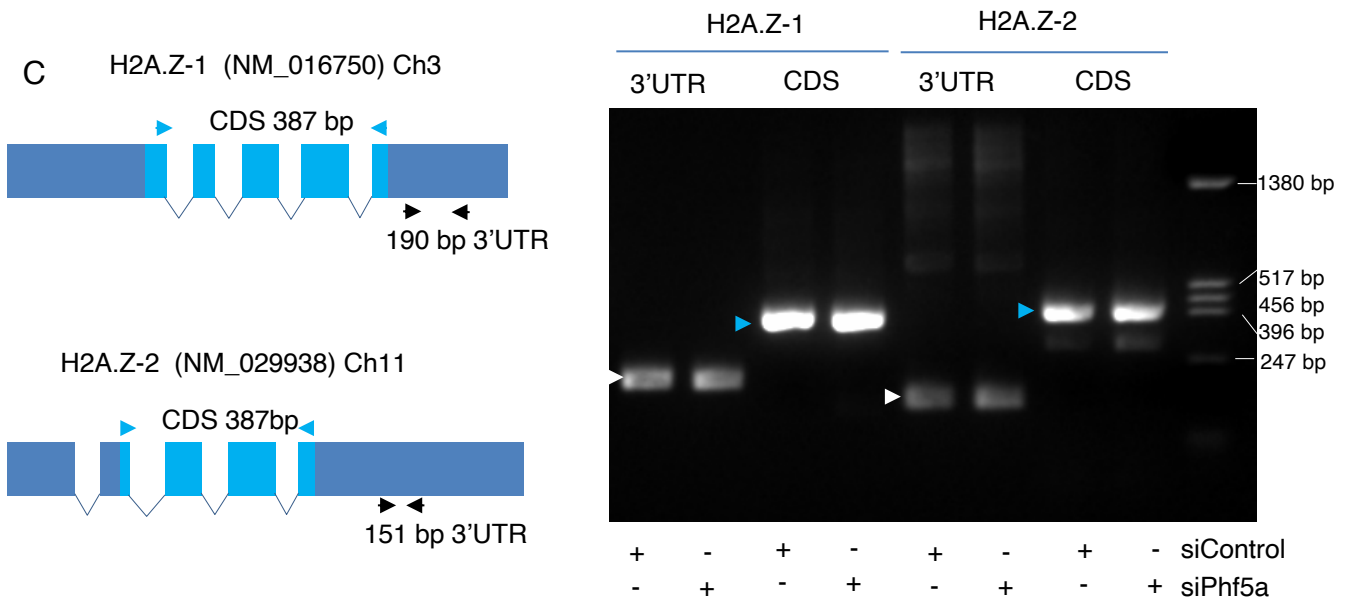

Appendix Figure S16

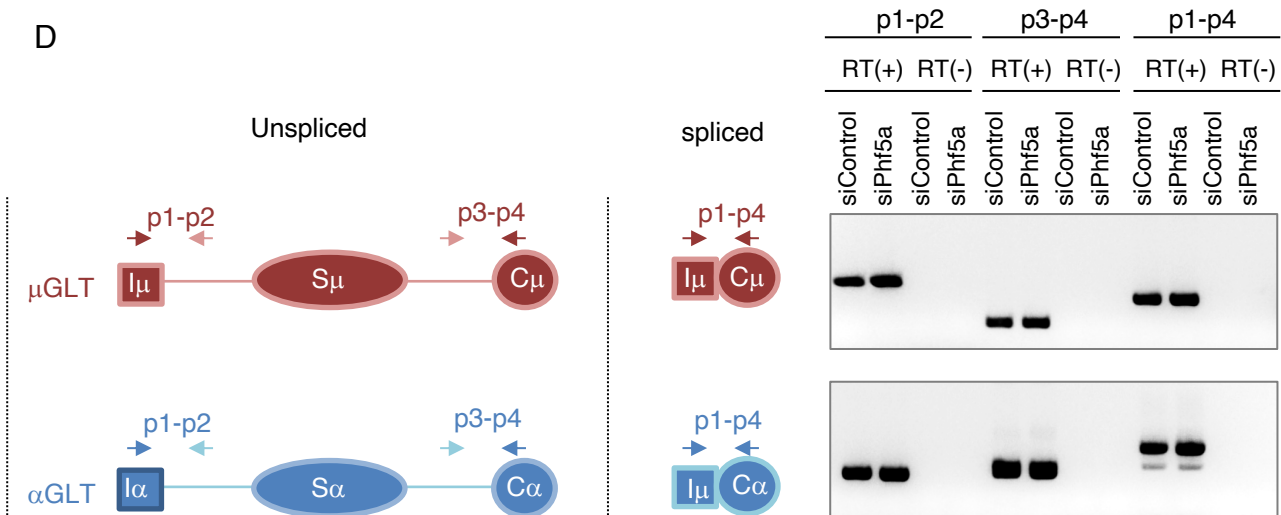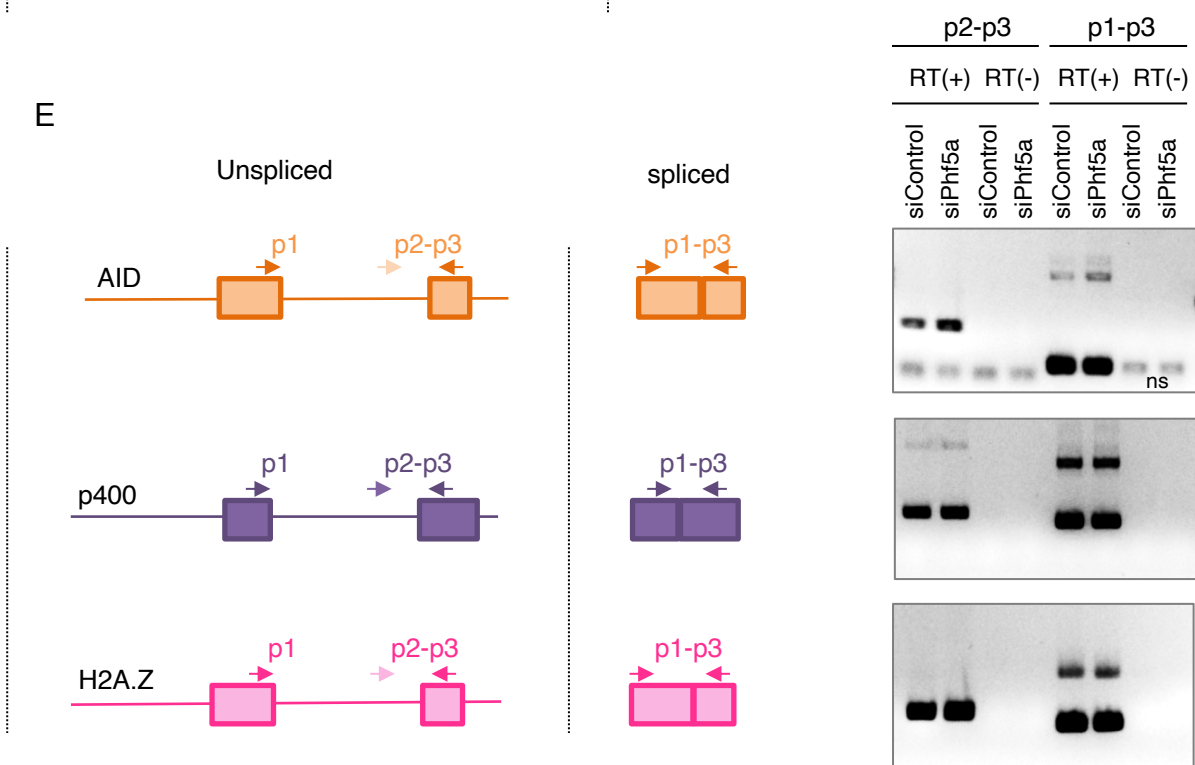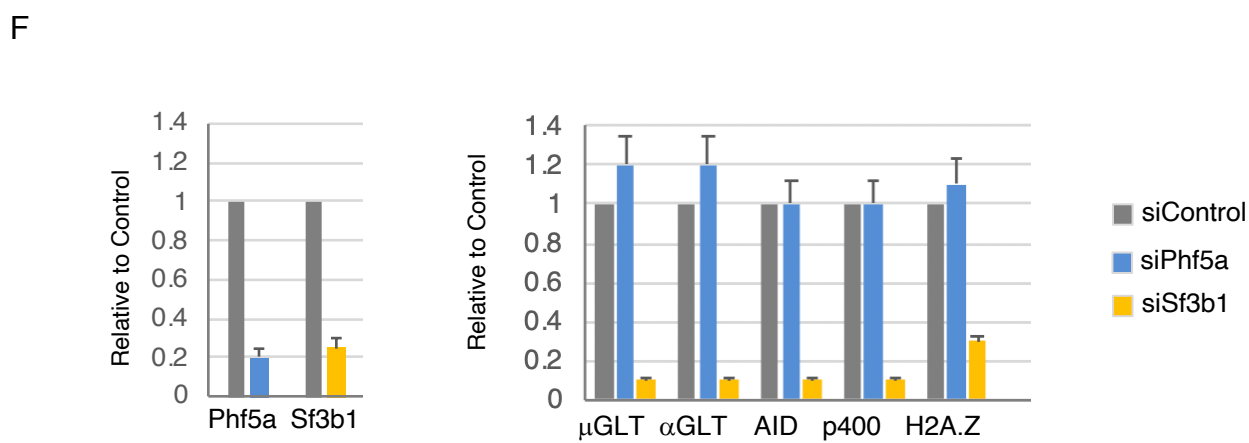

**Appendix Figure S16 : Phf5a depletion did not perturb splicing of IgH and some other transcripts.** (A) Schematics of IgM locus along with exon-intron organization. Primers (a-f) are shown on the top of the illustration, and the direction was indicated by the arrows. Unspliced as well as various spliced transcripts ( $\mu$ GLT, IgM-M, IgM-s) produced from the locus are shown just below the genomic organization. (B) RTPCR primer combination b+c was used to verify proper splicing out of I $\mu$  and S $\mu$ , which is important to produce IgM transcript having the variable region. Similarly, combination a+c are used to confirm the S $\mu$  is appropriately spliced out from the  $\mu$ GLT. Expected size RTPCR products were obtained from both siControl and siPhf5a treated samples (knockdown of Phf5a was confirmed, see Fig.15A, bottom panel). Cloning and sequencing of the PCR products (b+c/a+c) confirmed the correct splicing site in both samples (data not shown). Primer combination a+e and a+f were used to examine splicing of IgM-M form, and a+d was used for the IgM-S form. (C) Analysis of H2A.Z transcript isoforms and their splicing by RTPCR. Schematic representation of two H2A.Z isoforms that differs at 3'UTR. Since coding region are appropriately spliced out, expected size PCR products are evident in both siControl and siPhf5a treated sample. (D) RTPCR analysis S $\mu$  and S $\alpha$  intron splicing from  $\mu$ GLT and  $\alpha$ GLT, respectively. Position and directions of the primers (p1-p4) are shown in the diagram. Gel images with the PCR products are shown next to the illustration. RNA was extracted from siControl and siPhf5a treated cells stimulated with CIT for 24h. (E) RTPCR analysis of site specific splicing in AID, p400 and H2A.Z transcripts. Similar primer designing strategy was applied and schematically shown their location on the top of respective gene. Gel images of the PCR products are shown on the right. Primer pair p1-p3 can detect both spliced (shorter, dominant) and unspliced (longer, weaker) transcripts. (F) Quantitative RTPCR showing KD efficiency of Phf5a and Sf3b1 in CH12F3-2A cells. RNA isolated from siPhf5a and siSf3b1 treated samples were subjected to qR-PCR. Effect of Phf5a and Sf3b1 depletion on splicing was examined for a set of CSR linked genes (n=2, mean  $\pm$  sd).

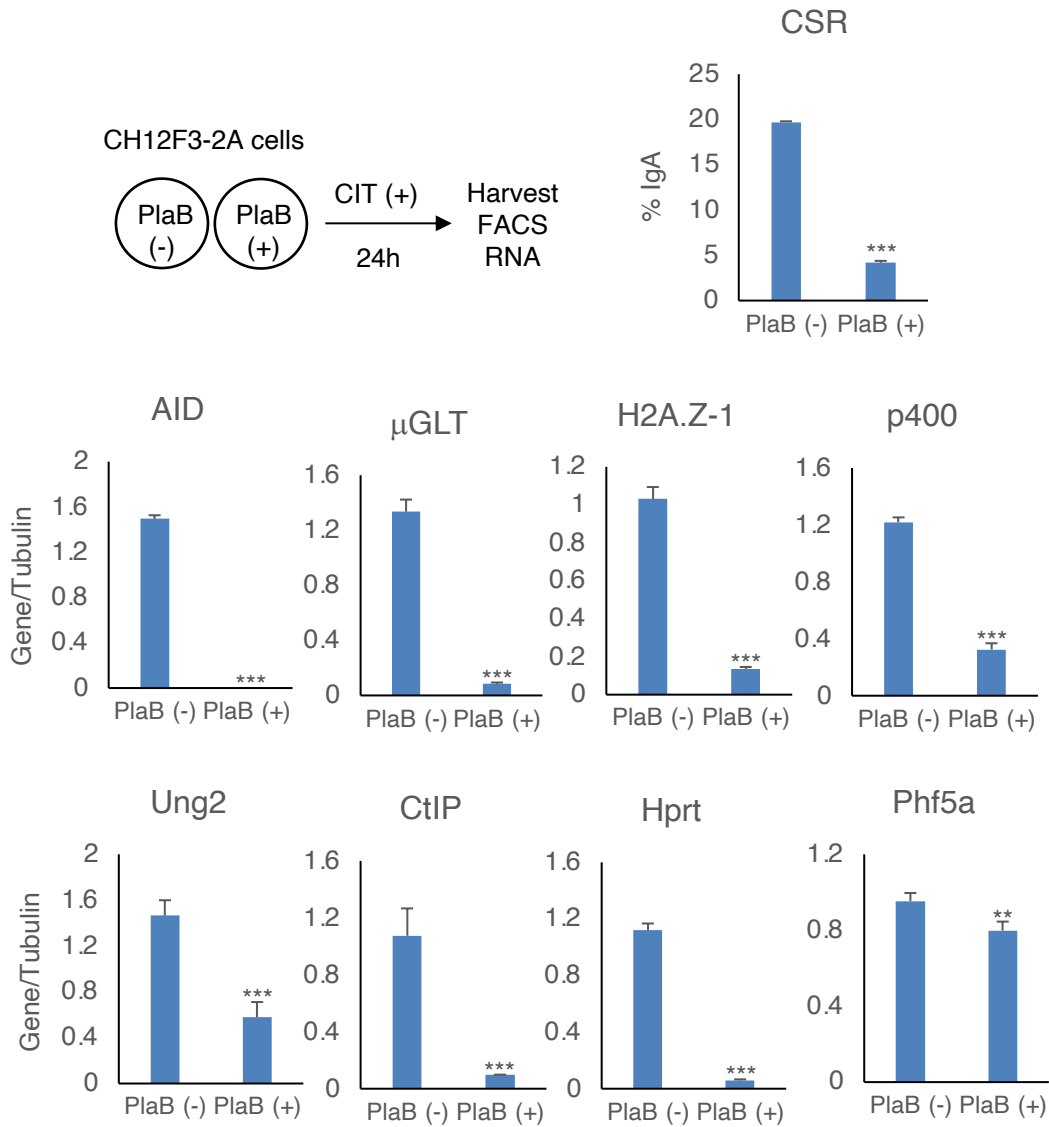

**Appendix Figure S17: Effect of a splicing inhibitor on CSR and associated transcripts.** Splicing inhibitor PladienolideB (PlaB) strongly inhibited CSR and the transcription of several genes, including the AID and  $\mu$ GLT that are indispensable for CSR. The qRT-PCR data were compiled from three experiments (mean  $\pm$  sd; two-tailed unpaired Student's t-test; \*\* $p \leq 0.01$ ; \*\*\*  $p \leq 0.001$ ).



**Appendix Table S1. Proteins identified in Phf5a-MF IP by MS analysis**

| Symbol       | Protein Name                                                       | Mass    | Score  | Nuclear Extract |
|--------------|--------------------------------------------------------------------|---------|--------|-----------------|
| SF3B1        | Splicing factor 3B subunit 1                                       | 145,724 | 10,189 | Nu-I            |
| SF3B3        | Splicing factor 3B subunit 3                                       | 135,465 | 8,724  | Nu-I            |
| SF3A1        | Splicing factor 3A subunit 1                                       | 88,489  | 2,722  | Nu-I            |
| PHF5A (Bait) | PHD finger-like domain-containing protein 5A                       | 12,397  | 2,470  | Nu-I            |
| WDR61        | WD repeat-containing protein 61                                    | 33,752  | 1,666  | Nu-I            |
| TMOD3        | Tropomodulin-3                                                     | 39,478  | 1,410  | Nu-I            |
| ANM5 (PRMT5) | Protein arginine N-methyltransferase 5                             | 72,634  | 1,409  | Nu-I            |
| DHX15        | Putative pre-mRNA-splicing factor ATP-dependent RNA helicase DHX15 | 90,949  | 1,218  | Nu-I            |
| RU2A         | U2 small nuclear ribonucleoprotein A                               | 28,340  | 1,199  | Nu-I            |
| TTC33        | Tetratricopeptide repeat protein 33                                | 29,353  | 1,096  | Nu-I            |
| GRP78        | 78 kDa glucose-regulated protein                                   | 72,377  | 999    | Nu-I            |
| SF3B4        | Splicing factor 3B subunit 4                                       | 44,327  | 821    | Nu-I            |
| PM14/Sf3b14  | Pre-mRNA branch site protein p14                                   | 14,576  | 790    | Nu-I            |
| SMD3         | Small nuclear ribonucleoprotein Sm D3                              | 13,907  | 759    | Nu-I            |
| RUXE         | Small nuclear ribonucleoprotein                                    | 10,797  | 728    | Nu-I            |
| MEP50        | Methylosome protein 50                                             | 36,919  | 697    | Nu-I            |
| SF3A2        | Splicing factor 3A subunit 2                                       | 49,880  | 667    | Nu-I            |
| SMD2         | Small nuclear ribonucleoprotein Sm D2                              | 13,518  | 655    | Nu-I            |
| C1TM         | Monofunctional C1-tetrahydrofolate synthase, mitochondrial         | 105,662 | 585    | Nu-I            |
| STK38        | Serine/threonine-protein kinase 38                                 | 54,139  | 451    | Nu-I            |
| RSMB         | Small nuclear ribonucleoprotein-associated protein B               | 23,640  | 443    | Nu-I            |
| RU2B         | U2 small nuclear ribonucleoprotein B                               | 25,307  | 439    | Nu-I            |
| SMD1         | Small nuclear ribonucleoprotein Sm D1                              | 13,273  | 429    | Nu-I            |
| SETX         | Helicase senataxin                                                 | 297,401 | 413    | Nu-I            |
| SR140        | U2 snRNP-associated SURP motif-containing protein                  | 118,188 | 325    | Nu-I            |
| SF3B5        | Splicing factor 3B subunit 5                                       | 10,113  | 293    | Nu-I            |
| RUXF         | Small nuclear ribonucleoprotein F                                  | 9,719   | 260    | Nu-I            |
| HNRH1        | Heterogeneous nuclear ribonucleoprotein H                          | 49,168  | 254    | Nu-I            |
| SPF45        | Splicing factor 45                                                 | 45,276  | 217    | Nu-I            |
| ICLN         | Methylosome subunit pICln                                          | 26,005  | 154    | Nu-I            |
| PPM1B        | Protein phosphatase 1B                                             | 42,768  | 140    | Nu-I            |
| HNRPC        | Heterogeneous nuclear ribonucleoproteins C1/C2                     | 34,364  | 109    | Nu-I            |
| H2A1F        | Histone H2A type 1-F                                               | 14,153  | 39     | Nu-I            |
| H2B1A        | Histone H2B type 1-A OS=Mus musculus GN=Hist1h2ba PE=2 SV=3        | 14,228  | 36     | Nu-I            |
| MRE11        | Double-strand break repair protein MRE11A                          | 80,173  | 35     | Nu-I            |
| RBM5         | RNA-binding protein 5                                              | 92,254  | 33     | Nu-I            |
| H2AX         | Histone H2A.X                                                      | 15,133  | 39     | Nu-I            |
| H2AZ         | Histone H2A.Z                                                      | 13,545  | 39     | Nu-I            |
| NU214        | Nuclear pore complex protein Nup214                                | 212,847 | 32     | Nu-I            |

| Symbol       | Protein Name                                                       | Mass    | Score | Nuclear Extract |
|--------------|--------------------------------------------------------------------|---------|-------|-----------------|
| SF3B3        | Splicing factor 3B subunit 3                                       | 135,465 | 6,982 | Nu-II           |
| SF3B1        | Splicing factor 3B subunit 1                                       | 145,724 | 2,648 | Nu-II           |
| H4           | Histone H4 (Ac)                                                    | 11,360  | 2,547 | Nu-II           |
| DDX42        | ATP-dependent RNA helicase DDX42                                   | 101,902 | 930   | Nu-II           |
| PHF5A (Bait) | PHD finger-like domain-containing protein 5A                       | 12,397  | 910   | Nu-II           |
| PM14         | Pre-mRNA branch site protein p14                                   | 14,576  | 543   | Nu-II           |
| SF3B4        | Splicing factor 3B subunit 4                                       | 44,327  | 404   | Nu-II           |
| SMD3         | Small nuclear ribonucleoprotein Sm D3                              | 13,907  | 273   | Nu-II           |
| WDR61        | WD repeat-containing protein 61                                    | 33,752  | 264   | Nu-II           |
| SF3A1        | Splicing factor 3A subunit 1                                       | 88,489  | 231   | Nu-II           |
| SMD1         | Small nuclear ribonucleoprotein Sm D1                              | 13,273  | 228   | Nu-II           |
| H2A1         | Histone H2A type 1                                                 | 14,127  | 211   | Nu-II           |
| GRP78        | 78 kDa glucose-regulated protein                                   | 72,377  | 205   | Nu-II           |
| C1TM         | Monofunctional C1-tetrahydrofolate synthase, mitochondrial         | 105,662 | 161   | Nu-II           |
| SMD2         | Small nuclear ribonucleoprotein Sm D2                              | 13,518  | 156   | Nu-II           |
| H2AV         | Histone H2A.V                                                      | 13,501  | 137   | Nu-II           |
| H2AZ         | Histone H2A.Z                                                      | 13,545  | 137   | Nu-II           |
| DHX15        | Putative pre-mRNA-splicing factor ATP-dependent RNA helicase DHX15 | 90,949  | 84    | Nu-II           |
| NH2L1        | NHP2-like protein 1                                                | 14,165  | 74    | Nu-II           |
| TTC33        | Tetratricopeptide repeat protein 33                                | 29,353  | 72    | Nu-II           |
| SF3B5        | Splicing factor 3B subunit 5                                       | 10,113  | 70    | Nu-II           |
| ANM5 (PRMT5) | Protein arginine N-methyltransferase 5                             | 72,634  | 65    | Nu-II           |
| H2AX         | Histone H2A.X                                                      | 15,133  | 60    | Nu-II           |
| H2B1A        | Histone H2B type 1-A                                               | 14,228  | 40    | Nu-II           |

**Appendix Table S2. List of antibodies, reagents and construts used**

| Reagent                                   | Source                  | Catalog #                    | Use/Assay                         |
|-------------------------------------------|-------------------------|------------------------------|-----------------------------------|
| <b>Antibodies</b>                         |                         |                              |                                   |
| Anti-IgM, FITC                            | eBioscience             | 1-5890-85                    | FACS                              |
| Anti-IgA, PE                              | Southern Biotech        | 1040-09                      | FACS                              |
| Biotin Anti Mouse IgG1                    | BD Pharmingen           | 553441                       | FACS                              |
| Biotin Anti mouse IgG3                    | BD Pharmingen           | 553401                       | FACS                              |
| APC Conjugated Streptavidine              | eBioscience             | 17-4317-82                   | FACS                              |
| Rabbit IgG                                | Millipore               | PP64B                        | ChIP, IP                          |
| Anti-PHF5A                                | Proteintech Group       | 15554-1-AP                   | ChIP, WB                          |
| Anti-p400                                 | Abcam                   | ab70163                      | ChIP, WB, IP                      |
| Anti-H2A                                  | Abcam                   | ab13923                      | ChIP, WB                          |
| Anti-H2B                                  | Abcam                   | ab1790                       | WB                                |
| Anti-H3                                   | Abcam                   | ab1791                       | ChIP, WB                          |
| Anti-H4                                   | Active Motif            | 61300                        | WB                                |
| Anti-H3K4me3                              | Millipore               | 07-473                       | ChIP, WB                          |
| Anti-H3K9me2                              | Active Motif            | 39041                        | ChIP, WB                          |
| Anti-H3K9me3                              | Active Motif            | 39062                        | ChIP, WB                          |
| Anti-H3K36me2                             | Abcam                   | ab9049                       | ChIP, WB                          |
| Anti-H3K36me3                             | Abcam                   | ab9050                       | ChIP, WB                          |
| Anti-KU80                                 | Santa Cruz              | sc-1485                      | ChIP, WB                          |
| Anti-EXO1                                 | Novus                   | NBP1-19709                   | ChIP, WB                          |
| Anti MRE11                                | Santa Cruz              | sc-135992                    | ChIP, WB                          |
| Anti-CtIP                                 | Abcam                   | ab70163                      | ChIP                              |
| Anti-APE1                                 | Abcam                   | ab194                        | ChIP                              |
| Anti-MSH2                                 | Santa Cruz              | sc-494                       | WB                                |
| Anti-53BP1                                | Novus                   | NB100-304                    | WB                                |
| Anti-PARP1                                | abcam                   | ab6079                       | WB                                |
| Anti-AID                                  | Cell Signaling          | 4949s                        | WB                                |
| Anti-SF3B1                                | Abcam                   | ab135946                     | WB                                |
| Anti-SF3B3                                | Proteintech Group       | 14577-1-AP                   | WB                                |
| Anti-SF3B14a                              | Thermo                  | PA5-24736                    | WB                                |
| Anti-U2AF65/U2F2                          | abcam                   | ab37483                      | WB                                |
| Anti-WDR61                                | Proteintech Group       | 22536-1-AP                   | WB                                |
| Anti-MEP50                                | Cell Signaling          | 2018S                        | WB                                |
| Anti-FLAG M2                              | Sigma                   | F-3165                       | WB, IP                            |
| Anti-cMyc                                 | Santa Cruz              | sc-40                        | WB                                |
| Anti-AcK                                  | Cell Signaling          | 9441L,9814S                  | WB                                |
| Anti-mouse-HRP                            | Rockland                | 18-8817-33                   | WB                                |
| Anti-rabbit-HRP                           | Rockland                | 18-8816-33                   | WB                                |
| Anti-Tubulin                              | Calbiochem              | CP06                         | WB                                |
| Anti-βActin                               | Sigma                   | A1978                        | WB                                |
| <b>Chemicals, Enzymes, Kits</b>           |                         |                              |                                   |
| mCD40L supernatant                        | Dr. Tarsuko Honjo's Lab | Nakamura <i>et al</i> , 1996 | CSR                               |
| TGF-β                                     | R&D Systems             | 240-B-010                    | CSR                               |
| IL-4                                      | WAKO                    | 090-06621                    | CSR                               |
| LPS                                       | Sigma                   | L7261 or 7136                | CSR                               |
| OHT (Tamoxifen)                           | Sigma                   | H7904                        | AIDER                             |
| Pladienolide B (PlaB)                     | Cayman Chemical         | 16538                        | Splicing Inhibitor                |
| QuickChange Site-Directed Mutagenesis Kit | Agilent Technologies    | 200518                       | PCR, Cloning                      |
| Expand Long Template PCR System           | Roche                   | 11 681 842 001               | IgH/c-Myc Translocation Assay     |
| PrimeSTAR HS DNA Polymerase               | TaKaRa                  | R010A                        | PCR, Cloning                      |
| LaTaq DNA Polymerase                      | TaKaRa                  | PR002B                       | αCD PCR                           |
| Pyrobest DNA Polymerase                   | TaKaRa                  | R005B                        | NHEJ PCR                          |
| KOD FX Neo DNA Polymerase                 | TOYOBO                  | KFX-201                      | RT-PCR                            |
| Superscript III Reverse Transcriptase     | Thermo Fisher Sc.       | 18080044                     | RT                                |
| PowerUp SYBR Green Master Mix             | Applied Biosystems      | A25742                       | qPCR                              |
| Expand Long Template PCR System           | Roche                   | 11681842001                  | LMPCR                             |
| T4 DNA polymerase                         | TaKaRa                  | 2040A                        | LMPCR                             |
| Exonuclease I                             | NEB                     | M0293S                       | LMPCR                             |
| RecJF                                     | NEB                     | M0264S                       | LMPCR                             |
| BD IMag Anti-PE Magnetic Particles DM     | BD Biosciences          | 557899                       | IgA(+) cells isolation            |
| Mouse B Lymphocyte Enrichment Set-DM      | BD Biosciences          | 557792                       | Splenic B cell isolation          |
| Lipofectamine 2000                        | Thermo Fisher Sc.       | 11668027                     | Transfection                      |
| SF Cell line 96-well Nucleofector Kit     | Lonza                   | V4SC-2096                    | Transfection (CH12 and BL2 cells) |
| P4 Primary Cell 96-well Nucleofector Kit  | Lonza                   | V4SP-4096                    | Transfection (Primary B cells)    |
| ChIP-IT Express Kit                       | Active Motif            | 53008                        | ChIP                              |
| Dynabeads M-280 Streptavidin              | Thermo Fisher Sc.       | 11205D                       | IP                                |
| Subcellular Protein Fractionation Kit     | Thermo Fisher Sc.       | 78840                        | Phf5a-MF IP                       |
| Silver Quest Staining Kit                 | Thermo Fisher Sc.       | LC6070                       | Phf5a-MF IP                       |
| <b>Stealth siRNA</b>                      |                         |                              |                                   |
| Mouse Phf5a                               |                         | MSS229122                    | Gene knockdown                    |
|                                           |                         | MSS229123                    | CH12F3-2A cells                   |
|                                           | Thermo Fisher Sc.       | MSS290234                    | Primary B cells                   |
|                                           |                         | HSS189220                    | Gene knockdown                    |
| Human Phf5a                               |                         | HSS131327                    | BL2-JP8bdeIER cell line           |
|                                           | Thermo Fisher Sc.       | HSS131328                    | NHEJ and HR assay cell lines      |

|               |                   |            |                      |
|---------------|-------------------|------------|----------------------|
| Mouse p400    | Thermo Fisher Sc. | MSS233138  | Gene knockdown       |
|               |                   | MSS233139  | CH12F3-2A cells      |
|               |                   | MSS233140  | Primary B cells      |
| Mouse Sf3b1   | Thermo Fisher Sc. | MSS234656  | Gene knockdown       |
|               |                   | MSS234658  | CH12F3-2A cells      |
|               |                   | MSS294473  |                      |
| Mouse Sf3b3   | Thermo Fisher Sc. | MSS200205  | Gene knockdown       |
|               |                   | MSS200206  | CH12F3-2A cells      |
|               |                   | MSS272152  |                      |
| Mouse Sf3b14a | Thermo Fisher Sc. | MSS227228, | Gene knockdown       |
|               |                   | MSS227229, | CH12F3-2A cells      |
|               |                   | MSS227230  |                      |
| Mouse U2af2   | Thermo Fisher Sc. | MSS212201  | Gene knockdown       |
|               |                   | MSS212202  | CH12F3-2A cells      |
|               |                   | MSS212203  |                      |
| Human H2A.Z   | Thermo Fisher Sc. | HSS142376  | Gene knockdown       |
|               |                   | HSS142377  | CH12F3-2A cells      |
|               |                   | HSS179165  | NHEJ assay cell line |

---

Construts used

---

|                                  |            |     |                    |
|----------------------------------|------------|-----|--------------------|
| Constructs in pCMV6-Entry vector |            |     |                    |
| H2A.Z_MF (Myc,Flag)              | This paper | N/A | Co-IP, WB          |
| CtIP_MF                          | This paper | N/A | Co-IP, WB          |
| Exo1_MF                          | This paper | N/A | Co-IP, WB          |
| H2A.Z_M                          | This paper | N/A | Co-IP, WB          |
| CtIP_M                           | This paper | N/A | Co-IP, WB          |
| Exo1_M                           | This paper | N/A | Co-IP, WB          |
| Phf5a <sup>R</sup> _MF_WT        | This paper | N/A | CSR rescue, WB, IP |
| Phf5a <sup>R</sup> _MF_C11A      | This paper | N/A | CSR rescue, WB     |
| Phf5a <sup>R</sup> _MF_C23A      | This paper | N/A | CSR rescue, WB     |
| Phf5a <sup>R</sup> _MF_C26A      | This paper | N/A | CSR rescue, WB     |
| Phf5a <sup>R</sup> _MF_C30A      | This paper | N/A | CSR rescue, WB     |
| Phf5a <sup>R</sup> _MF_C33A      | This paper | N/A | CSR rescue, WB     |
| Phf5a <sup>R</sup> _MF_C40A      | This paper | N/A | CSR rescue, WB     |
| Phf5a <sup>R</sup> _MF_C46A      | This paper | N/A | CSR rescue, WB     |
| Phf5a <sup>R</sup> _MF_C49A      | This paper | N/A | CSR rescue, WB     |
| Phf5a <sup>R</sup> _MF_C58A      | This paper | N/A | CSR rescue, WB     |
| Phf5a <sup>R</sup> _MF_C61A      | This paper | N/A | CSR rescue, WB     |
| Phf5a <sup>R</sup> _MF_C72A      | This paper | N/A | CSR rescue, WB, IP |
| Phf5a <sup>R</sup> _MF_C75A      | This paper | N/A | CSR rescue, WB, IP |
| Phf5a <sup>R</sup> _MF_C85A      | This paper | N/A | CSR rescue, WB     |
| Phf5a <sup>R</sup> _MF_C23A/C26A | This paper | N/A | CSR rescue, WB     |
| Phf5a <sup>R</sup> _MF_C30A/C33A | This paper | N/A | CSR rescue, WB     |
| Phf5a <sup>R</sup> _MF_C46A/C49A | This paper | N/A | CSR rescue, WB     |
| Phf5a <sup>R</sup> _MF_C58A/C61A | This paper | N/A | CSR rescue, WB     |
| Phf5a <sup>R</sup> _MF_C72A/C75A | This paper | N/A | CSR rescue, WB, IP |
| Phf5a <sup>R</sup> _MF_K29Q      | This paper | N/A | CSR rescue, WB     |
| Phf5a <sup>R</sup> _MF_S35N      | This paper | N/A | CSR rescue, WB     |
| Phf5a <sup>R</sup> _MF_S53N      | This paper | N/A | CSR rescue, WB     |
| Phf5a <sup>R</sup> _MF_S67N      | This paper | N/A | CSR rescue, WB     |
| Phf5a <sup>R</sup> _MF_S93N      | This paper | N/A | CSR rescue, WB     |
| Phf5a <sup>R</sup> _MF_S94N      | This paper | N/A | CSR rescue, WB     |
| Phf5a <sup>R</sup> _MF_T41Q      | This paper | N/A | CSR rescue, WB     |
| Phf5a <sup>R</sup> _MF_T76Q      | This paper | N/A | CSR rescue, WB     |
| Phf5a <sup>R</sup> _MF_T96Q      | This paper | N/A | CSR rescue, WB     |
| Phf5a <sup>R</sup> _MF_Y36A      | This paper | N/A | CSR rescue, WB     |
| Phf5a <sup>R</sup> _MF_Y36C      | This paper | N/A | CSR rescue, WB     |
| Phf5a <sup>R</sup> _MF_K29R      | This paper | N/A | CSR rescue, WB, IP |
| Phf5a <sup>R</sup> _MF_K29Q      | This paper | N/A | CSR rescue, WB, IP |
| Phf5a <sup>R</sup> _MF_K29R/C23A | This paper | N/A | CSR rescue, WB, IP |
| Phf5a <sup>R</sup> _MF_K29Q/C23A | This paper | N/A | CSR rescue, WB, IP |
| Phf5a <sup>R</sup> _MF_del N5    | This paper | N/A | CSR rescue, WB     |
| Phf5a <sup>R</sup> _MF_del N10   | This paper | N/A | CSR rescue, WB     |
| Phf5a <sup>R</sup> _MF_del N20   | This paper | N/A | CSR rescue, WB     |
| Phf5a <sup>R</sup> _MF_del C15   | This paper | N/A | CSR rescue, WB     |
| Phf5a <sup>R</sup> _MF_delC87-95 | This paper | N/A | CSR rescue, WB     |

---

**Appendix Table S3. List of assay specific oligonucleotides**

| Use/Assay                        | Forward/Reverse        | Oligo/Primer Sequences                       |
|----------------------------------|------------------------|----------------------------------------------|
| Stealth siPhf5a #3 sequence      | Forward                | 5' -CACCAUUCAGGAGAAGGAUAGAGAU                |
| siPhf5a #3 Resistant Mutagenesis | Forward                | 5' -GTCGCGGTCTTTTGTGGATCGTACACTCTTTACAGTAGTA |
| RT-PCR                           |                        |                                              |
| μGLT                             | Forward                | 5' -CTCTGGCCCTGCTTATTGTTG                    |
|                                  | Reverse                | 5' -AATGGTGCTGGGCAGGAAGT                     |
| αGLT                             | Forward                | 5' -CCTGGCTGTCCCTATGAA                       |
|                                  | Reverse                | 5' -GAGCTGGTGGAGTGTCACTG                     |
| γ1GLT                            | Forward                | 5' -GGCCCTCCAGATCTTTGAG                      |
|                                  | Reverse                | 5' -GGATCCAGAGTCCAGGTCACCT                   |
| γ3GLT                            | Forward                | 5' -TGGGCAAGTGGATCTGAACA                     |
|                                  | Reverse                | 5' -CTCAGGGAAGTAGCCTTTGACA                   |
| AID                              | Forward                | 5' -ATGGACAGCCTTCTGATGAAGCAAAAAG             |
|                                  | Reverse                | 5' -TCAAAAATCCCAACATACGAAATGCATCTCG          |
| Phf5a                            | Forward                | 5' -ATGGCTAAACATCATCCAGAT                    |
|                                  | Reverse                | 5' -CCTCTCTTGAAGCCGTA                        |
| p400                             | Forward                | 5' -CTCCACAGACGGTGACGCTCACACA                |
|                                  | Reverse                | 5' -CTACTGGCATGGAGTTTGGTGGGCGT               |
| Hprt                             | Forward                | 5' -CTCGAAGTGTGGATACAGG                      |
|                                  | Reverse                | 5' -TGGCCTATAGGCTCATAGTG                     |
| Tubulin                          | Forward                | 5' -CAACGTC AAGACGGCCGTGTG                   |
|                                  | Reverse                | 5' -GACAGAGGCAAACTGAGCACC                    |
| αCircle DNA                      | Forward                | 5' -CCAGGCATGGTTGAGATAGAGATAG                |
|                                  | Reverse                | 5' -AATGGTGCTGGGCAGGAAGT                     |
| Gapdh                            | Forward                | 5' -ATCCTGTAGGCCAGGTGATG                     |
|                                  | Reverse                | 5' -CTGGGTCACTGCGAGGCTGTGA                   |
| IgH/c-Myc Translocation          | Forward (Sμ) 1st PCR   | 5' -ACTATGCTATGGACTACTGGGGTCAAG              |
|                                  | Reverse (cMyc) 1st PCR | 5' -GTGAAAACCGACTGTGGCCCTGGAA                |
|                                  | Forward (Sμ) 2nd PCR   | 5' -CCTCAGTCACCGTCTCCCTCAGTA                 |
|                                  | Reverse (cMyc) 2nd PCR | 5' -GTGGAGGTGTATGGGGTGTAGAC                  |
|                                  | c-Myc Probe            | 5' DIG -GGACTGCGCAGGGAGACCTACAGGGG           |
| SHM                              |                        |                                              |
| BL2-IgH V                        | Forward                | 5' -CTATAACCATGGTTCATGAAACACCTGTGGTTC        |
|                                  | Reverse                | 5' -TGCATGCATTTCTAGAAAGGTTGGGGCGGATGCACCTCC  |
| CH12-IgH 5'Sμ                    | Forward                | 5' -AATGGATACCTCAGTGGTTTTAAATGGTGG           |
|                                  | Reverse                | 5' -GCGGCCCGGCTCATTCCAGTTCATTACAG            |
| DNA break assay (Biotin-dUTP)    | Sμ-F                   | 5' -GCTTCTAAAATGCGCTAAACTGAGGTGATT           |
|                                  | Sμ-R                   | 5' -GTTTAGCTCTATTCAACCTAG                    |
|                                  | Sα-F                   | 5' -TCACCCAGAAGACCATCGACC                    |
|                                  | Sα-R                   | 5' -CGCTGACATTGGTGGTPTTACC                   |
|                                  | β2m                    | β2m-F<br>β2m-R                               |
| DNA break assay (LMPCR)          | Linker-long            | 5' -GCGGTGACCCGGGAGATCTGAATTCAC              |
|                                  | Linker-short           | 5' -GTGAATTCAGATC                            |
|                                  | Forward (Sμ)           | 5' -GCAGAAAATTTAGATAAAATGGATACCTCAGTGG       |
|                                  | Reverse (Linker)       | 5' -GCGGTGACCCGGGAGATCTGAATTC                |
| Gapdh                            | Forward                | 5' -ATCCTGTAGGCCAGGTGATG                     |
|                                  | Reverse                | 5' -GCTCAAGGCTTTTAAAGCT                      |
| Sμ-Sα switch junction PCR        | Forward (Sμ)1st PCR    | 5' -ATTCCACACAAGACTCTGACC                    |
|                                  | Reverse (Sα)1st PCR    | 5' -AGCGCTCCAGATTTCTAAGCCCCACTCCTG           |
|                                  | Forward (Sμ) 2nd PCR   | 5' -GTAAGGAGGGACCCAGGCTAAG                   |
|                                  | Reverse (Sμ) 2nd PCR   | 5' -TTTGGGCAGTGGATAGAGCTATGTTCTCAG           |
| NHEJ substrate PCR               | NHEJ-F                 | 5' -GTACGGTGGGAGGTCTATATAAG                  |
|                                  | NHEJ-R                 | 5' -TTCATCTTGTGGTCATGCGG                     |
| DC PCR                           |                        |                                              |
| Direct Joining (Sμ-Sα)           | Forward                | 5' -GGCCCGTCGACGGAGACCAATAATCAGAGGGAAG       |
|                                  | Reverse                | 5' -CAGGCCAGAAGGAGCTGAGGCCTCAGAACA           |
| Inverse Joining (Sμ-Sα)          | Forward (1st)          | 5' -CCATAGCAGTTGGTCAATCCTTGTCTCC             |
|                                  | Reverse (1st)          | 5' -CCATATATCCCTCTGAGGCACACCCTCACA           |
|                                  | Forward (2nd)          | 5' -CCATAGCAGTTGGTCAATCCTTGTCTCC             |
|                                  | Reverse (2nd)          | 5' -CAGGCCAGAAGGAGCTGAGGCCTCAGAACA           |
| nAchRe-R                         | Forward                | 5' -GCGCCATCGATGGACTGCTGTGGGTTTACCCAG        |
|                                  | Reverse                | 5' -GGCCGTCGACAGGCGCAGCTGACACCCTAAG          |
| DNA End Resection Assay (5'Sμ)   | Forward                | 5' -CTACTGCCTACACTGGACTGTTCT                 |
|                                  | Reverse                | 5' -CTCACCCTATCTCACCCTATCT                   |
| Gapdh                            | Forward                | 5' -ATCCTGTAGGCCAGGTGATG                     |
|                                  | Reverse                | 5' -GCTCAAGGCTTTTAAAGCT                      |

**Appendix Table S4. List of PCR primers used in Appendix Figure 15A**

| No. | Primer ID  | Primer Sequence                                  | Gene      | Refseq         |
|-----|------------|--------------------------------------------------|-----------|----------------|
| 1   | ORF-163F   | 5' -ATGACCACCCTCACGCGCCAAGA                      | Mad2l2    | NM_001305420.1 |
|     | ORF-135R   | 5' -TCAGCTGTTCTTATGCGCTCGCTCTTCA                 |           |                |
| 2   | ORF-164F   | 5' -ATGGATAGCTGCAGAATGACCAC                      | Shld3     | NM_001365338.1 |
|     | ORF-136R   | 5' -TTACATACTAAAAATAACACCATATTTGTGTACAAA         |           |                |
| 3   | ORF-173F   | 5' -TGGGGATTCAAGGGTTACTTCAGTTCA                  | Exo1      | NM_012012.4    |
|     | ORF-143R   | 5' -AATCCATTTAAAAATGACATTGAGACTAATACATCTCTCC     |           |                |
| 4   | ORF-180F   | 5' -ATGGAAGGAAAGTAAGCAGAATCTATCTTGCT             | Xrcc4     | NM_028012.4    |
|     | ORF-150R   | 5' -TCTTTCAAGGTCTGGGGTAGTGAAGAGGCCAA             |           |                |
| 5   | ORF-166F   | 5' -ATGGAATCCCAGGCACCCACACC                      | Shld1     | NM_001358260.1 |
|     | ORF-138R   | 5' -CTAGTGGGTAAAAGCGTGTGTCCCTGG                  |           |                |
| 6   | ORF-181F   | 5' -ATGGCTTCCTCACAAACTTCACAAACT                  | Lig4      | NM_176953.3    |
|     | ORF-151R   | 5' -AGCAAGCTCTAAAGCAAATACTGGTTTTTCCT             |           |                |
| 7   | ORF-182F   | 5' -ATGACTTTGGCTTTCAAGATCCTCTCCCGA               | Lig3      | NM_001291245.1 |
|     | ORF-152R   | 5' -CAAAGTCTAGCAGGGAGCTATCAGCCT                  |           |                |
| 8   | ORF-183F   | 5' -ATGAGAAAAAAGAGCAAGAGAGGAAAGGAG               | Lig1      | NM_001083188.1 |
|     | ORF-153R   | 5' -GGAGGTTAATAGTCTTCAACGTCGGAGTC                |           |                |
| 9   | ORF-176F   | 5' -ATGTGGAAGCTGCTCCCGGC                         | Nbs1      | NM_013752.3    |
|     | ORF-146R   | 5' -GCTTCCTTTACAAGGTTCAATTATCTTCTTTTTTACATTAGGAT |           |                |
| 10  | ORF-169F   | 5' -ATGGGTAACCTCTTCTGTTGAAGAA                    | Ku80      | NM_001357519.1 |
|     | ORF-141R   | 5' -CTATATCATGTCCAGTAAATCATCCACATCACC            |           |                |
| 11  | ORF-165F   | 5' -ATGAGTCAAGGATCACAAAGTTCACATTTTTTTGGGTGC      | Shld2     | NM_001360074.1 |
|     | ORF-137R   | 5' -TCACTCCTTCCCAGGAATGCCTCCTG                   |           |                |
| 12  | ORF-168F   | 5' -ATGTCAGAGTGGGAGTCTACTACA                     | Ku70      | NM_010247.2    |
|     | ORF-140R   | 5' -CTTTAGTCAGTCTTCTCCAAGTGTCTGATAAG             |           |                |
| 13  | ORF-174F   | 5' -ATGAGCCCCACAGATCCACTTGAC                     | Mre11     | NM_001310728.1 |
|     | ORF-144R   | 5' -ACATTATCTTCGGTTTCTTCTGGGCAACTAC              |           |                |
| 14  | ORF-179F   | 5' -ATGGCGGAGGCCTCGGAGAG                         | Parp1     | NM_007415.3    |
|     | ORF-149R   | 5' -CACTTTACCACAGGGATGTCTTAAATTGAACCTT           |           |                |
| 15  | ORF-171F   | 5' -ATGAGCATTTTCAGGAAGCGGCTGTGG                  | CtIP/Rbp8 | NM_001081223   |
|     | ORF-154R   | 5' -TCACGCCAGTGTCTAGGTCTCTGT                     |           |                |
| 16  | ORF_162F   | 5' -ATGCCAGGGGAGCAGATGGACCC                      | 53bp1     | NM_001290830.1 |
|     | ORF_134R   | 5' -TTAGTGAGAAACATAATCATGTTTATATTTGGATGCTG       |           |                |
| 17  | ORF-167F   | 5' -ATGAGTCTAGCACTCAATGATCTGCTCATTTGCT           | ATM       | NM_007499.3    |
|     | ORF-139R   | 5' -AAGGTCACACCCAAGCTTTCCATCCT                   |           |                |
| 18  | ORF-175F   | 5' -ATGTCCCGGATCGAAAAGATGAGCATTCT                | Rad50     | NM_009012.2    |
|     | ORF-145R   | 5' -AAGACAAGTTAGTGAACATAAGAACCAGGGAG             |           |                |
| 19  | ORF-177F   | 5' -ATGGCTGCTGTTCCTCTGAACAATCTACAAGAA            | DNA2_Blm  | NM_001042527.2 |
|     | ORF-147R   | 5' -AACAAGATCTATGCGCAGAGAACTGTTAGGAGA            |           |                |
| 20  | ORF_885F1  | 5' -ATGGTGCTCACGCTCGGAGAAAGTTG                   | Kdm3a     | NM_173001      |
|     | ORF_885R   | 5' -TTAAGGTTTGCCCAAAGTGGATTCACTGG                |           |                |
| 21  | ORF_904F   | 5' -CGTCACAGCGATGCCAAAGCGGGGA                    | Apex 1    | NM_009687      |
|     | ORF_904R   | 5' -TCACAGTGTAGGTAAGGGTGTATGG                    |           |                |
| 22  | ORF_903F   | 5' -ATGCTGCGCGTGGTAAGCTGGAAC                     | Apex2     | NM_029943      |
|     | ORF_903R   | 5' -CAGTCTGTTTCAGCTGGCCCTGCTCC                   |           |                |
| 23  | ORF_902F   | 5' -GAAATGGCGGTGCAGCCTAAGGAG                     | Msh2      | NM_008628      |
|     | ORF_902R   | 5' -TCACGGAGCCGGAGCCTTTATCCGT                    |           |                |
| 24  | ORF_901F   | 5' -TGCTCGCTGGACCATGGGCGTCTT                     | Ung2      | NM_011677      |
|     | ORF_901R   | 5' -GGGTCACAGCTCCTTCCAGTTGATG                    |           |                |
| 25  | ORF_917F   | 5' -ATGCACCATGGCAGTGGCTCTCAGA                    | p400      | NM_029337      |
|     | ORF_917R   | 5' -CTACTGGCATGGAGGTTTGGTGGGCGGT                 |           |                |
| 26  | ORF_AID_F  | 5' -ATGGACAGCCTTCTGATGAAGCAA                     | AID/AICDA | NM_009645      |
|     | ORF_AID_R  | 5' -CGCGGATCCAAATCCCAACATACGAAATGCATC            |           |                |
| 27  | ORF_Ph5a_F | 5' -GGCGGATCCCGCTAAACATCATCCAGATTTG              | Phf5a     | NM_026737      |
|     | ORF_Ph5a_R | 5' -ATCGAATTCTTACCTTCTTGAAGCCGTATTT              |           |                |

**Appendix Table S5. List of PCR primers used in Appendix Figure 15B**

| No | Primer ID | Primer Sequence                               | Gene    |
|----|-----------|-----------------------------------------------|---------|
| 1  | Mad2l2_F  | 5' -TGCACACAAGAGAAGCTGCTACTCGAAAC             | Mad2l2  |
|    | Mad2l2_R  | 5' -TCAGCTGTCTTATGCGCTCGCTCTTCA               |         |
| 2  | Shld3_F   | 5' -ACATTTGGACAAAACCTCAATCGC                  | Shld3   |
|    | Shld3_R   | 5' -TTACATACTAAAAATAACACCATATTTGTGTACAAA      |         |
| 3  | Exo1_F    | 5' -GGGTTTAAAAAGATTCTGAAAAGCTTCCTT            | Exo1    |
|    | Exo1_R    | 5' -AATCCATTTAAAAATGACATTGAGACTAATACATCTCTCC  |         |
| 4  | Xrcc4_F   | 5' -GCTGCAGAACTCTTCATAAGGATGATTCCATATT        | Xrcc4   |
|    | Xrcc4_R   | 5' -TCTTTCAAGGCTGCGGTAGTGAAGAGGCAA            |         |
| 5  | Shld1_F   | 5' -ATTCTATGAAGCATTTGCCCATCCACTGC             | Shld1   |
|    | Shld1_R   | 5' -CTAGTGGGTAAAAGCGTGTGTCCCTGG               |         |
| 6  | Lig4_F    | 5' -GGACTTGTATGCTGTTATTAATGACTTGAGTTCCAG      | Lig4    |
|    | Lig4_R    | 5' -AGCAAGCTCTAAAGCAAATACTGGTTTTCCCT          |         |
| 7  | Lig3_F    | 5' -CGACGGGGACCTGGTACAGGAATTTGA               | Lig3    |
|    | Lig3_R    | 5' -CAAAGTCCTAGCAGGGAGCTATCAGCCT              |         |
| 8  | Lig1_F    | 5' -GGTTCATTCGTGTCCGTAAAGACAAGCAG             | Lig1    |
|    | Lig1_R    | 5' -GGAGGTTAATAGTCTTCAACGTCGGAGTC             |         |
| 9  | Nbs1_F    | 5' -ATGTGTAATGAATGTGGTCCACTGAAGAATTTCA        | Nbs1    |
|    | Nbs1_R    | 5' -GCTTCCTTTACAAGGTTCAATATCTTCTTTTACATTAGGAT |         |
| 10 | Ku80_F    | 5' -AAAAGTATGGACTGCATCAAAGCTTTTCC             | Ku80    |
|    | Ku80_R    | 5' -CTATATCATGTCCAGTAAATCATCCACATCACC         |         |
| 11 | Ku70_F    | 5' -ATGAGTTTAAAGAACTTGTCTATCCTCCAGGTTAT       | Ku70    |
|    | Ku70_R    | 5' -CTTTAGTCAGTTCTTCTCCAAGTGTCTGATAAG         |         |
| 12 | Mre11_F   | 5' -TAGACGCTTTCAGATCTACCCGACAAC               | Mre1    |
|    | Mre11_R   | 5' -ACATTATCTTCGGTTTTCTTCTTGGGCAACTAC         |         |
| 13 | Parp1_F   | 5' -CACAGTGTCAAAGGTTTGGGAAAAACCA              | Parp1   |
|    | Parp1_R   | 5' -CACTTTACCACAGGGATGTCTTAAAAATTGAACTT       |         |
| 14 | CtIP_F    | 5' -GCAGATTTGCCAGCAGAAGAAAGAG                 | CtIP    |
|    | CtIP_R    | 5' -TCACGCCAGTGTCTAGGTCTCTGT                  |         |
| 15 | Tp53bp1_F | 5' -AAAACCCTTTCCAGAATCTGAAGTCTCTC             | T53bp1  |
|    | Tp53bp1_R | 5' -TTAGTGAGAAACATAATCATGTTTATATTTTGGATGCTG   |         |
| 16 | Atm_F     | 5' -AATGCAGATGATCAAGAATGCAAAACAAAGTCTTAG      | Atm     |
|    | Atm_R     | 5' -AAGGTCACACCCAAGCTTTCCATCCT                |         |
| 17 | Rad50_F   | 5' -AAACCTTCTGTCTGAACTGTGCATCCTT              | Rad50   |
|    | Rad50_R   | 5' -AAGACAAGTTAGTGAACATAAGAACCAGGGAG          |         |
| 18 | Blm_F     | 5' -ATGAAAGAAAAGAAAAGAAAATGTCAGCCACCC         | Blm     |
|    | Blm_R     | 5' -AACAAAGATCTATGCGCAGAGAAGTGTAGGAGA         |         |
| 19 | Apex1_F   | 5' -TGCTGGCTTTACTCCCCAGGAGCGC                 | Apex1   |
|    | Apex1_R   | 5' -TCACAGTGTAGGTAAAGGGTGATGG                 |         |
| 20 | Apex2_F   | 5' -GAAGTCTATGCTGAGTGGGCCCTCA                 | Apex2   |
|    | Apex2_R   | 5' -CAGTCTGTTTCAGCTGGGCTGTCTC                 |         |
| 21 | Msh2_F    | 5' -CTCGCTGGGATGTGACGAAGCCGA                  | Msh2    |
|    | Msh2_R    | 5' -TCACGGAGCCGGAGCCTTTATCCGT                 |         |
| 22 | Ung2_F    | 5' -TGCTCGGCTGGACCATGGGCGTCTT                 | Ung2    |
|    | Ung2_R    | 5' -AGCGCCGCGGCTTGTTCCTCTGG                   |         |
| 23 | Kdm3a_F   | 5' -GTGGCTGAAGACTTTGTGTCTCCAGA                | Kdm3a   |
|    | Kdm3a_R   | 5' -TTAAGGTTTGGCCAAACTGGATTCACTGG             |         |
| 24 | p400_F    | 5' -CTCCACAGACGGTGACGCTCACACA                 | p400    |
|    | p400_R    | 5' -CTACTGGCATGGAGGTTTGGTGGGCGT               |         |
| 25 | Aid_F     | 5' -ATGGACAGCCTTCTGATGAAGCAA                  | Aid     |
|    | Aid_R     | 5' -CGCGGATCCAAATCCCAACATACGAAATGCATC         |         |
| 26 | Phf5a_F   | 5' -GGCGGATCCCCTAAACATCATCCAGATTTG            | Phf5a   |
|    | Phf5a_R   | 5' -ATCGAATTCTTACCTCTTCTTGAAGCCGTATTT         |         |
| 27 | Tubulin_F | 5' -CAACGTCAAGACGGCCGTGTG                     | Tubulin |
|    | Tubulin_R | 5' -GACAGAGGCAAACCTGAGCACC                    |         |
| 28 | Hprt_F    | 5' -CTCGAAGTGTGGATACAGG                       | Hprt    |
|    | Hprt_R    | 5' -TGGCCTATAGGCTCATAGTG                      |         |

**Appendix Table S6. List of PCR primers used in Appendix Figures 16 and 17**

| Appendix Figure | Primer ID          | Primer Sequence                         |
|-----------------|--------------------|-----------------------------------------|
| S16B            | a_IgH $\mu$ _F     | 5' -CTCACCATGGGATGGAGCTGTATCA           |
|                 | b_IgH $\mu$ _F     | 5' -CTCTGGCCCTGCTTATTGTTG               |
|                 | c_IgH $\mu$ _R     | 5' -GAAGGAAATGGTGCTGGGCAGGAAGTCCCG      |
|                 | d_IgH $\mu$ _R     | 5' -TCAATAGCAGGTGCCGCTGTGTCAGACAT       |
|                 | e_IgH $\mu$ _R     | 5' -CTTGAACAGGGTGACGGTGGTGCCTG          |
|                 | f_IgH $\mu$ _R     | 5' -GCTCAGCTGTCTGTGGGCCAGACAT           |
| S16C            | H2A.Z-1cds_F       | 5' -TCGGAGCTTCAGCACGGTCCGAGATG          |
|                 | H2A.Z-1cds_R       | 5' -CCCGATCAGCGATTTGTGGATGTGT           |
|                 | H2A.Z-1utr3'_F     | 5' -CCAACCAACCAAATTTCTGC                |
|                 | H2A.Z-1utr3'_R     | 5' -CCACCAGAGTGAAACAATG                 |
|                 | H2A.Z-2cds_F       | 5' -GTCGCGCGGCCGAGACCATG                |
|                 | H2A.Z-2cds_R       | 5' -CACGTCCTAAGCAGTTTTCTGCTGC           |
|                 | H2A.Z-2utr3'_F     | 5' -GGTCTGTAACAGGGCAGAGG                |
|                 | H2A.Z-2utr3'_R     | 5' -CTGGCCAATCAACACATGAC                |
| S16D            | p1_ $\mu$ GLT_F    | 5' -CTCTGGCCCTGCTTATTGTTG               |
|                 | p2_ $\mu$ GLT_R    | 5' -CCATGAGCTCTATGATTATTGGTTAACAGGCAAC  |
|                 | p3_ $\mu$ GLT_F    | 5' -CAAGGAAATAGCAGGGTGTAGAGGAATCTC      |
|                 | p4_ $\mu$ GLT_R    | 5' -GAAGGAAATGGTGCTGGGCAGGAAGTCCCG      |
|                 | p1_ $\alpha$ GLT_F | 5' -CCTGGCTGTTCCCTATGAA                 |
|                 | p2_ $\alpha$ GLT_R | 5' -TCTAGCCTGGGAGTCTCCTG                |
|                 | p3_ $\alpha$ GLT_F | 5' -GGGGCTTAGAAATCTGGAGCGCTAGACTGC      |
|                 | p4_ $\alpha$ GLT_R | 5' -GAGCTGGTGGGAGTGTCACTG               |
| S16E            | p1_AID_F           | 5' -CCGGCTAACCAGACAACCTTCGGCGC          |
|                 | p2_AID_F           | 5' -CAGGTGGGGTTCCTTCCAGGGCAGA           |
|                 | p3_AID_R           | 5' -TCAAAATCCCAACATACGAAATGCATCTCG      |
|                 | p1_p400_F          | 5' -GCCCAAATCCTTCGCTGCGTTTCTG           |
|                 | p2_p400_F          | 5' -TGTGGCCAGTATACAACAAGTTGCA           |
|                 | p3_p400_R          | 5' -CTACTGGCATGGAGGTTTGGTGGGCGT         |
|                 | p1_H2A.Z_F         | 5' -GTACTTGAGTTGGCAGGAAATGCGT           |
|                 | p2_H2A.Z_F         | 5' -TCAGTACAGGGTGCTTTTCATGGGGT          |
|                 | p3_H2A.Z_R         | 5' -CCCGATCAGCGATTTGTGGATGTGT           |
| S16F, S17       | Phf5a_F            | 5' -GGCGGATCCCGCTAAACATCATCCAGATTTG     |
|                 | Phf5a_R            | 5' -ATCGAATTCCTTACCTCTTCTTGAAGCCGATTTT  |
|                 | Sf3b1_F            | 5' -AGGGCCTGAGGGTTGCTATTGGACC           |
|                 | Sf3b1_R            | 5' -TATGACCAGCTCTACACTGATCGGC           |
|                 | $\mu$ GLT          | p1_ $\mu$ GLT_F / p4_ $\mu$ GLT_R       |
|                 | $\alpha$ GLT       | p1_ $\alpha$ GLT_F / p4_ $\alpha$ GLT_R |
|                 | AID                | p1_AID_F / p3_AID_R                     |
|                 | p400               | p1_p400_F / p3_p400_R                   |
|                 | H2A.Z              | p1_H2A.Z_F / p3_H2A.Z_R                 |
|                 | Ung2_F             | 5' -TGCTCGGCTGGACCATGGGCGTCTT           |
|                 | Ung2_R             | 5' -AGCGCCGCGCCTTGTTCCTCTGG             |
|                 | CtIP_F             | 5' -GCAGATTTGCCAGCAGAAGAAAGAG           |
|                 | CtIP_R             | 5' -TCACGCCAGTGTCTAGGTCCTCTGT           |
|                 | Hprt_F             | 5' -CTCGAAGTGTGGATACAGG                 |
|                 | Hprt_R             | 5' -TGGCCTATAGGCTCATAGTG                |
|                 | Tubulin_F          | 5' -CAACGTCAAGACGGCCGTGTG               |
|                 | Tubulin_R          | 5' -GACAGAGGCAACTGAGCACC                |
