# Supplementary material
Source: PubMed Central journal article supplement (PMC8204862)

C

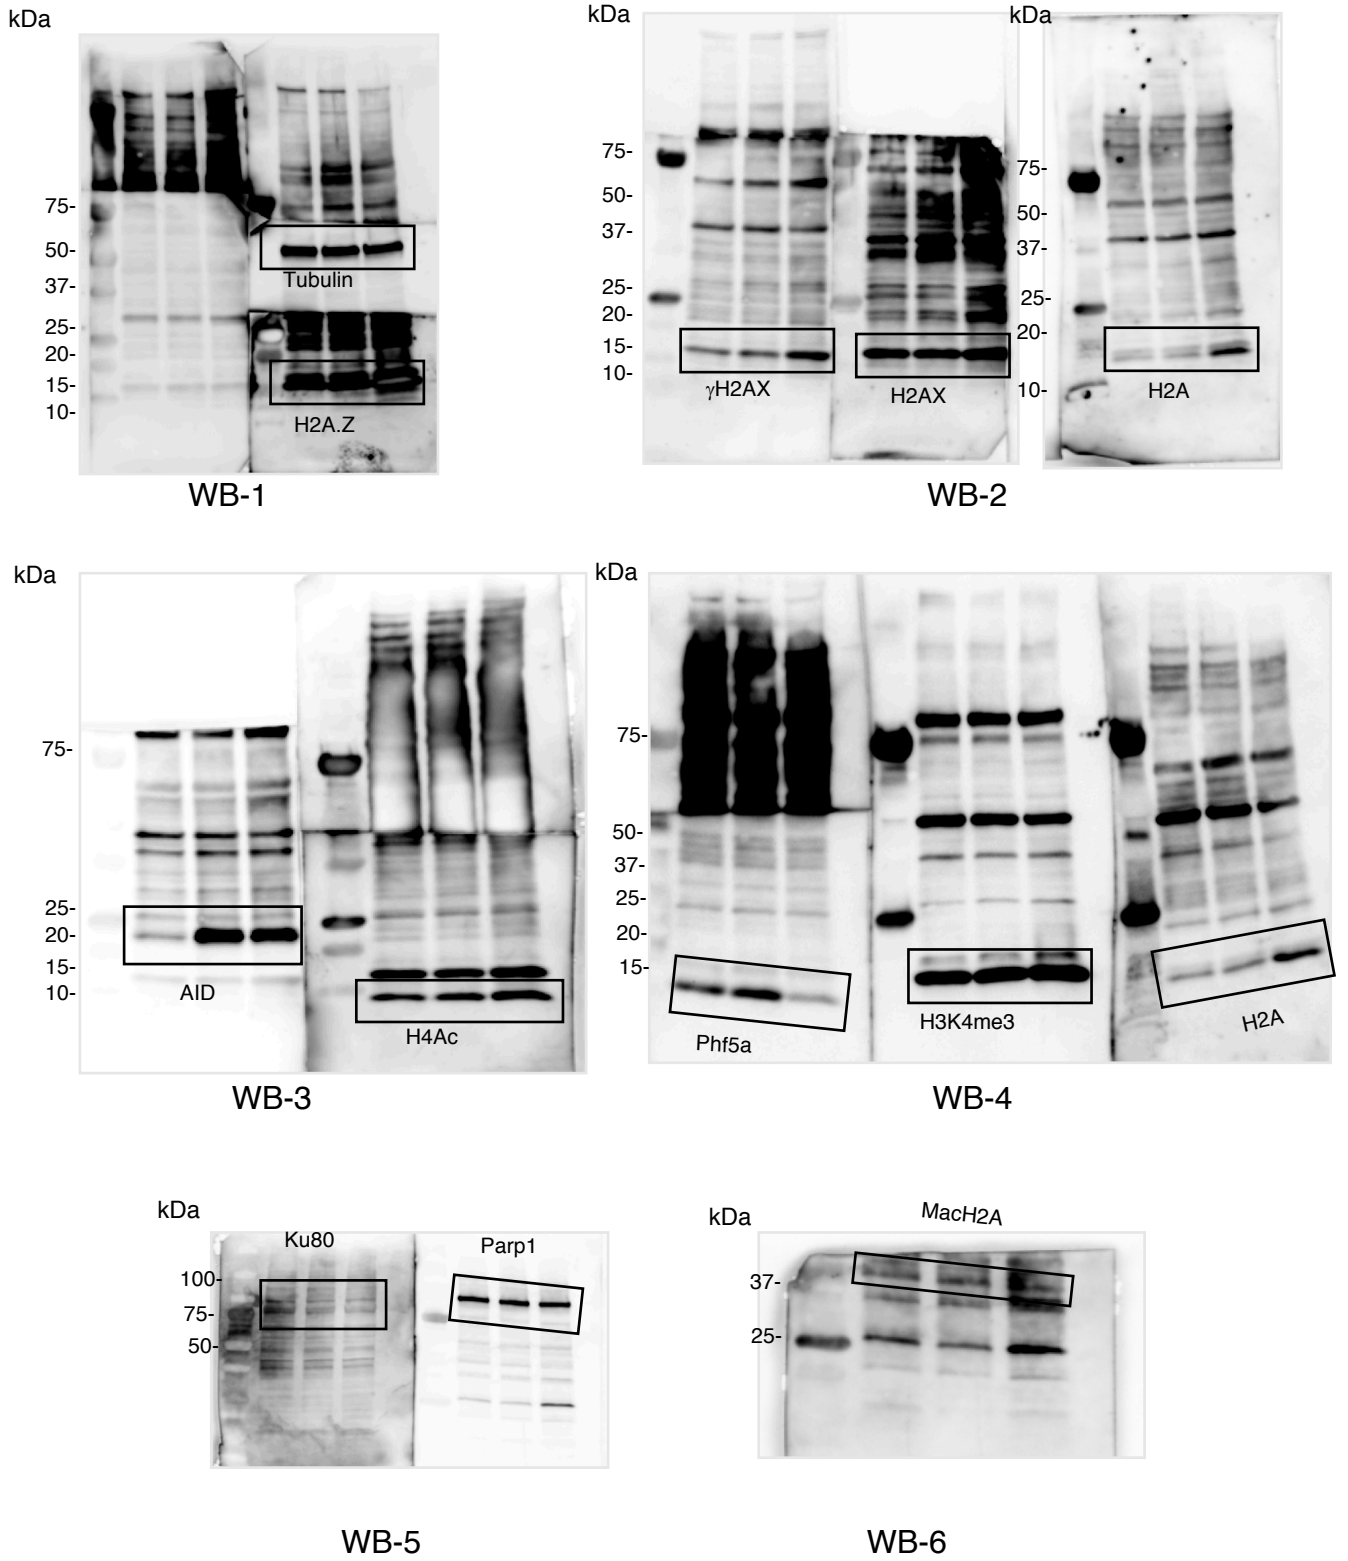

Source data Fig. 6

Supplement: EMBJ-40-e106393-s001.pdf [file EMBJ-40-e106393-s001.pdf]

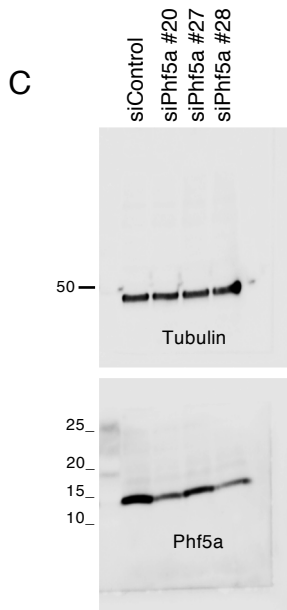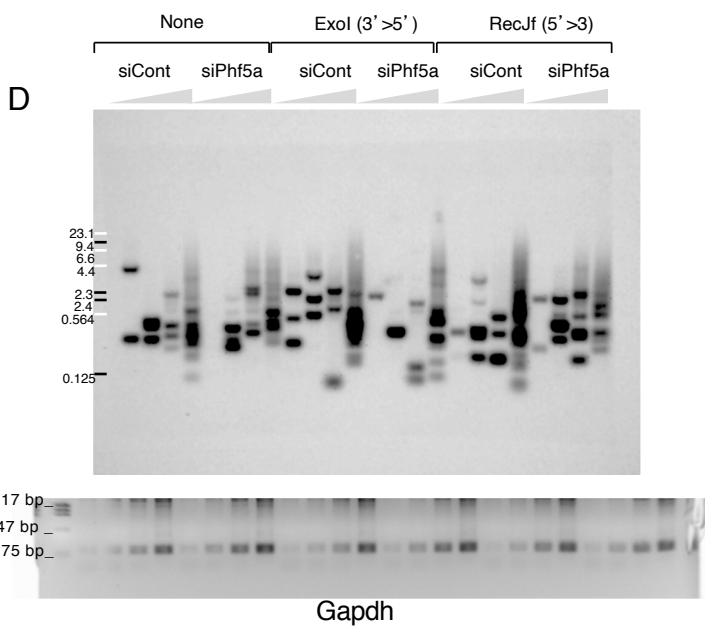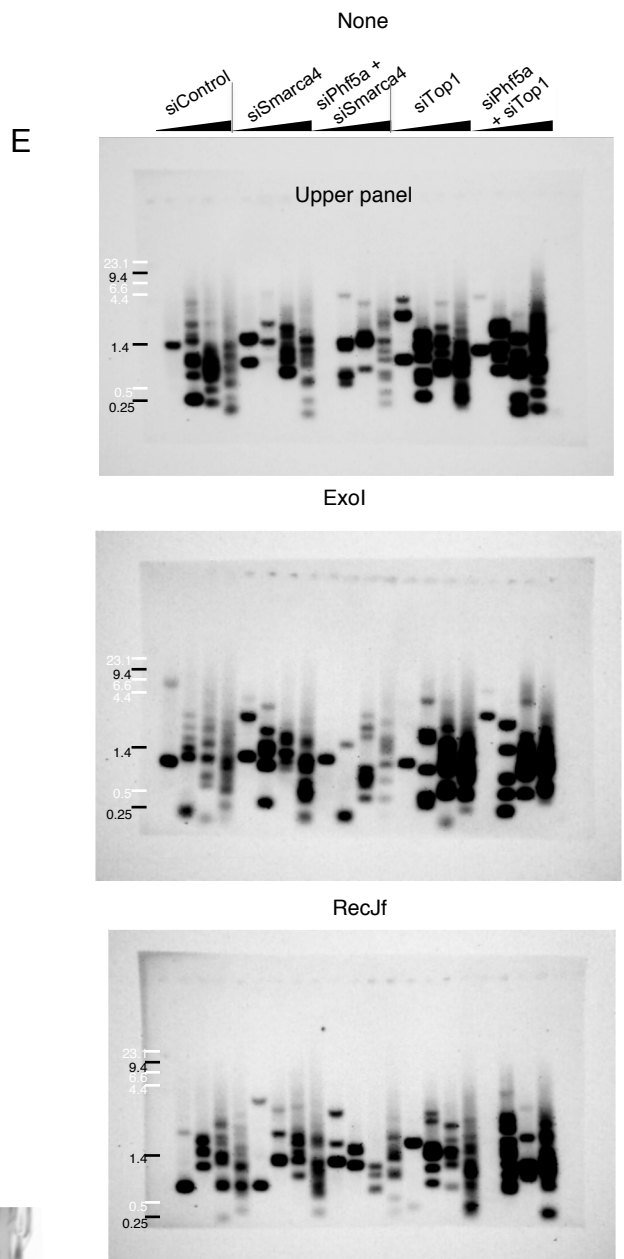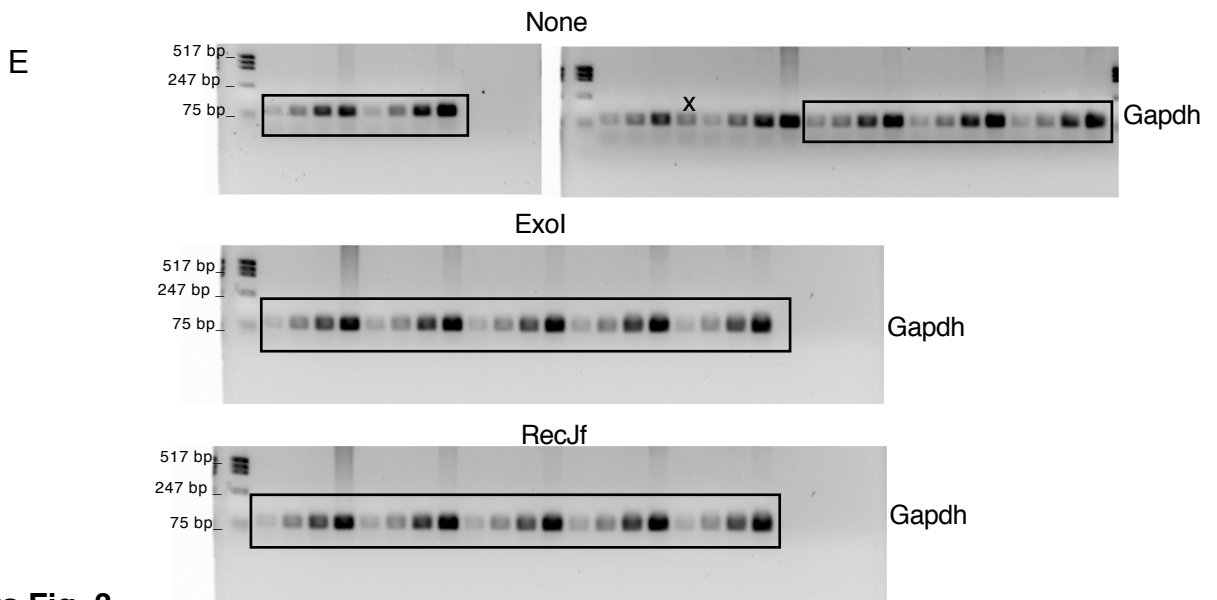

Supplement: EMBJ-40-e106393-s002.pdf [file EMBJ-40-e106393-s002.pdf]

C

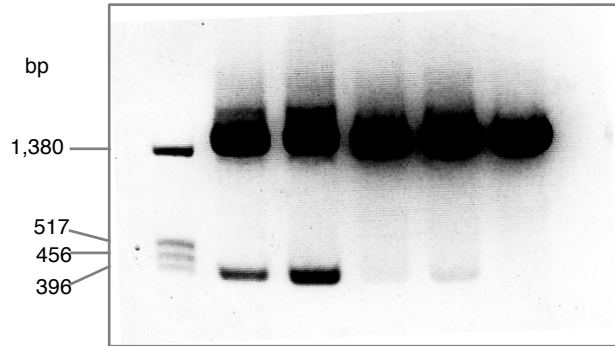

Source Data Fig. 4

Supplement: EMBJ-40-e106393-s004.pdf [file EMBJ-40-e106393-s004.pdf]

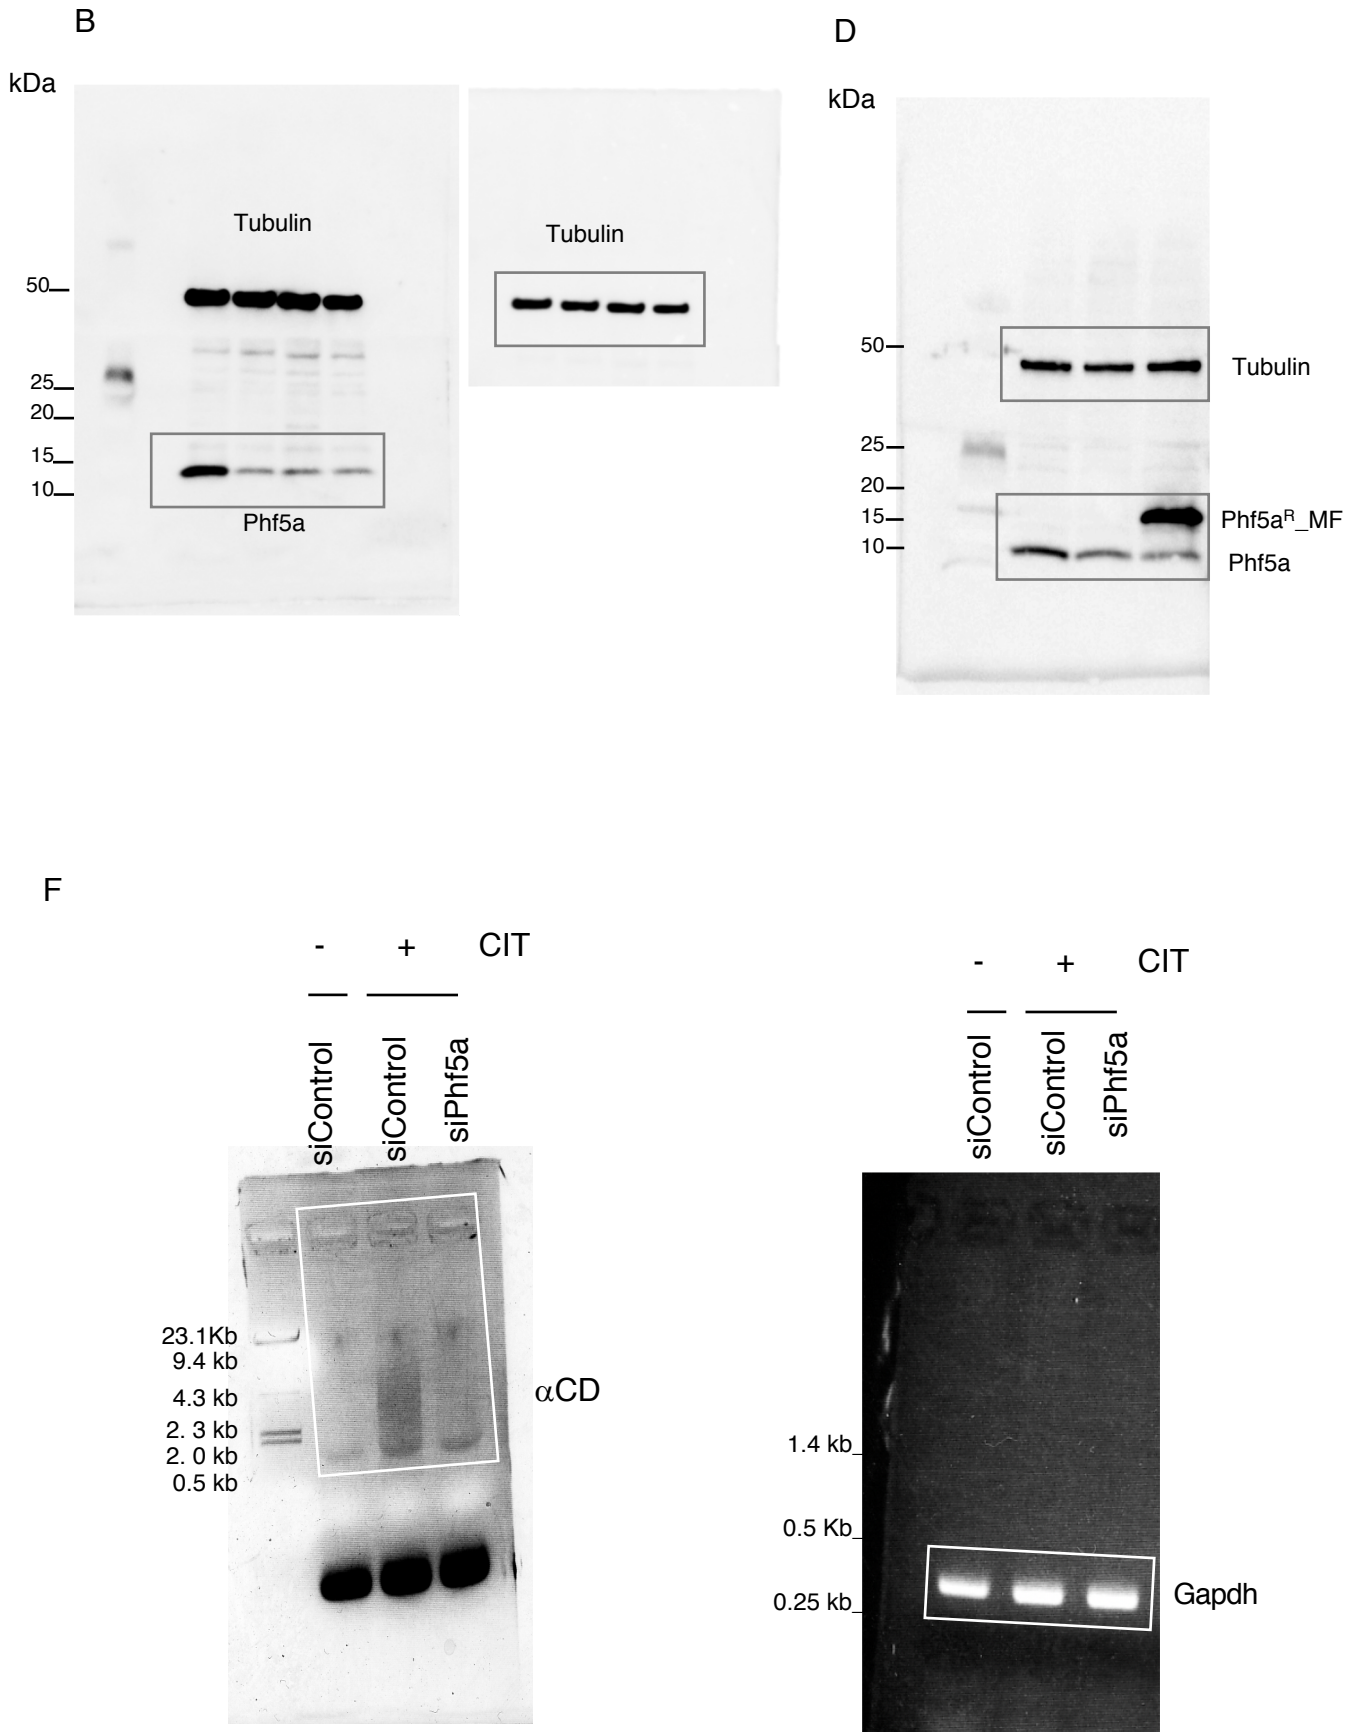

Source Data Fig. 1

Supplement: EMBJ-40-e106393-s005.pdf [file EMBJ-40-e106393-s005.pdf]

**B** siControl siSmarca4 Smarca4 + siPhf5a

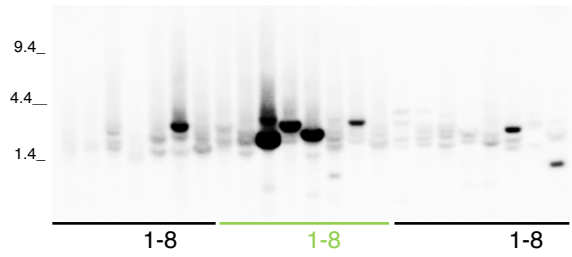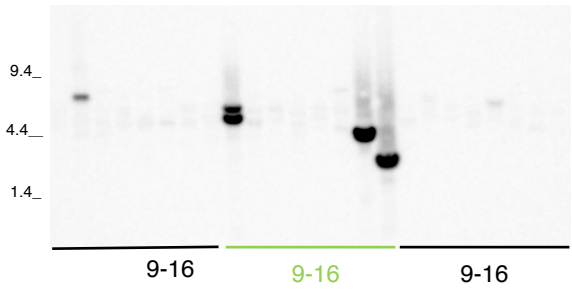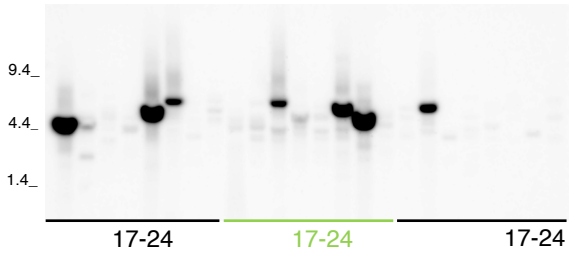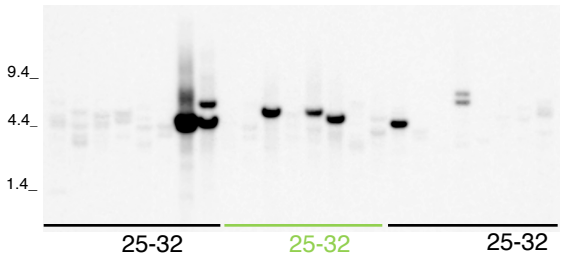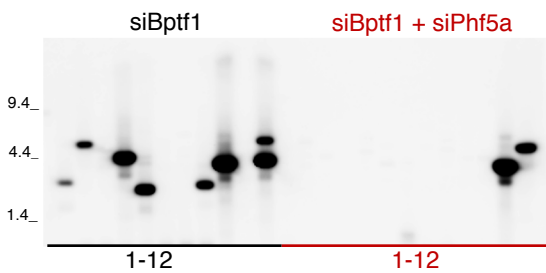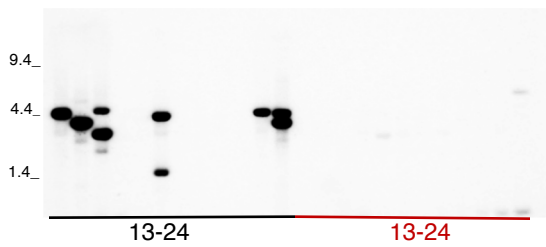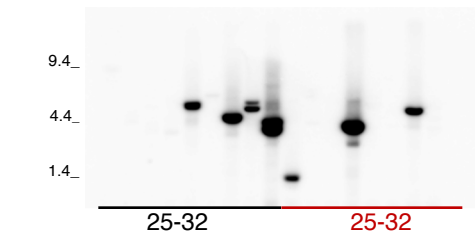

siTop1 siTop1 + siPhf5a

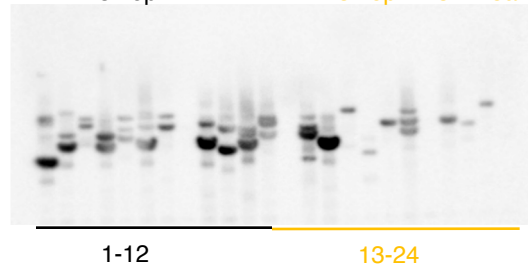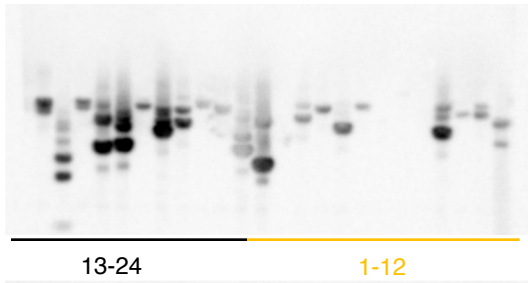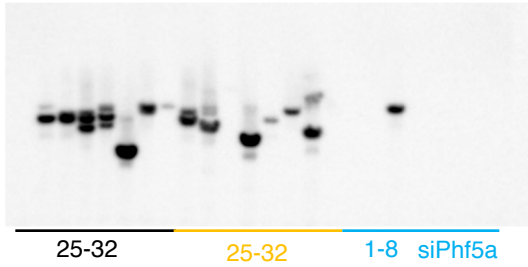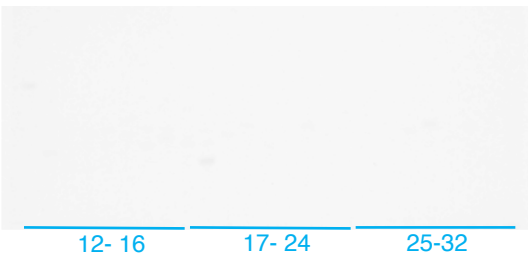

siSmarca2 siSmarca2 + siPhf5a

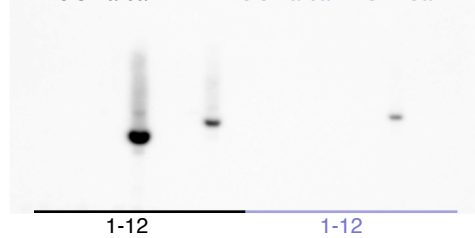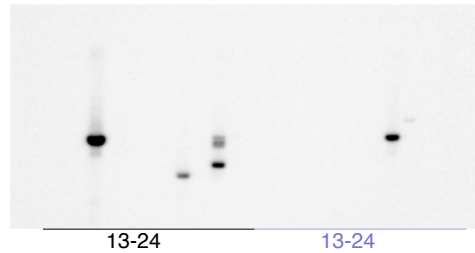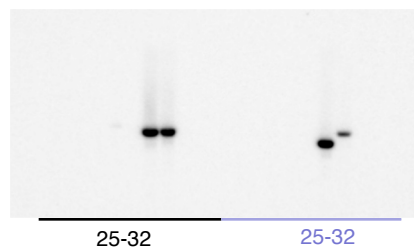

Supplement: EMBJ-40-e106393-s006.pdf [file EMBJ-40-e106393-s006.pdf]

C

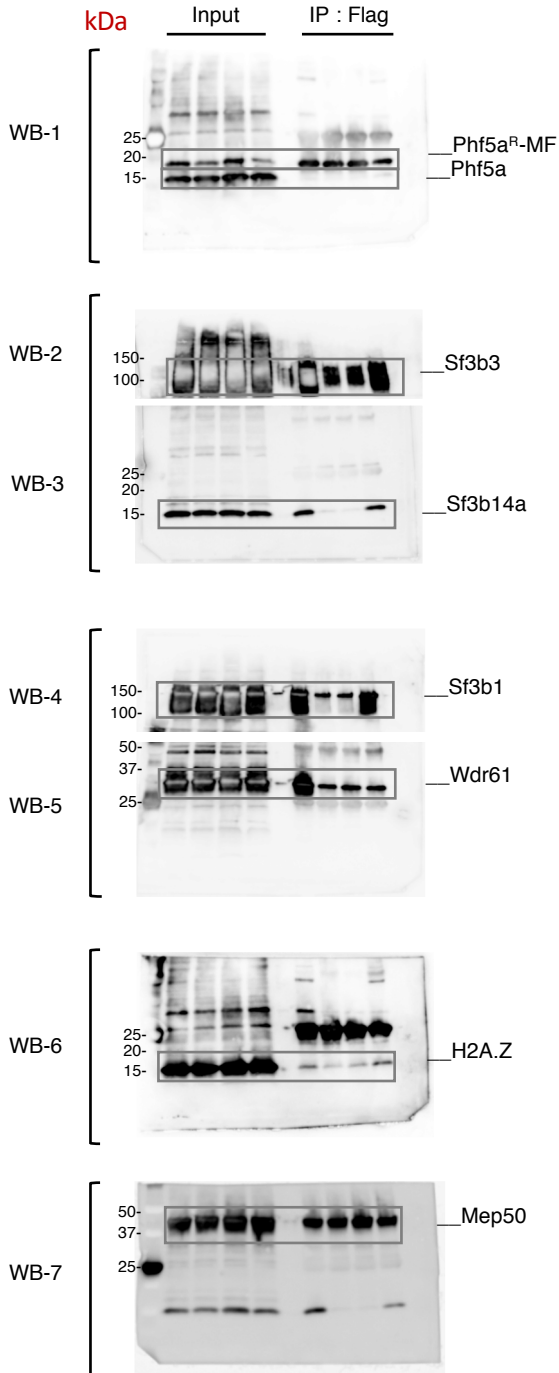

D

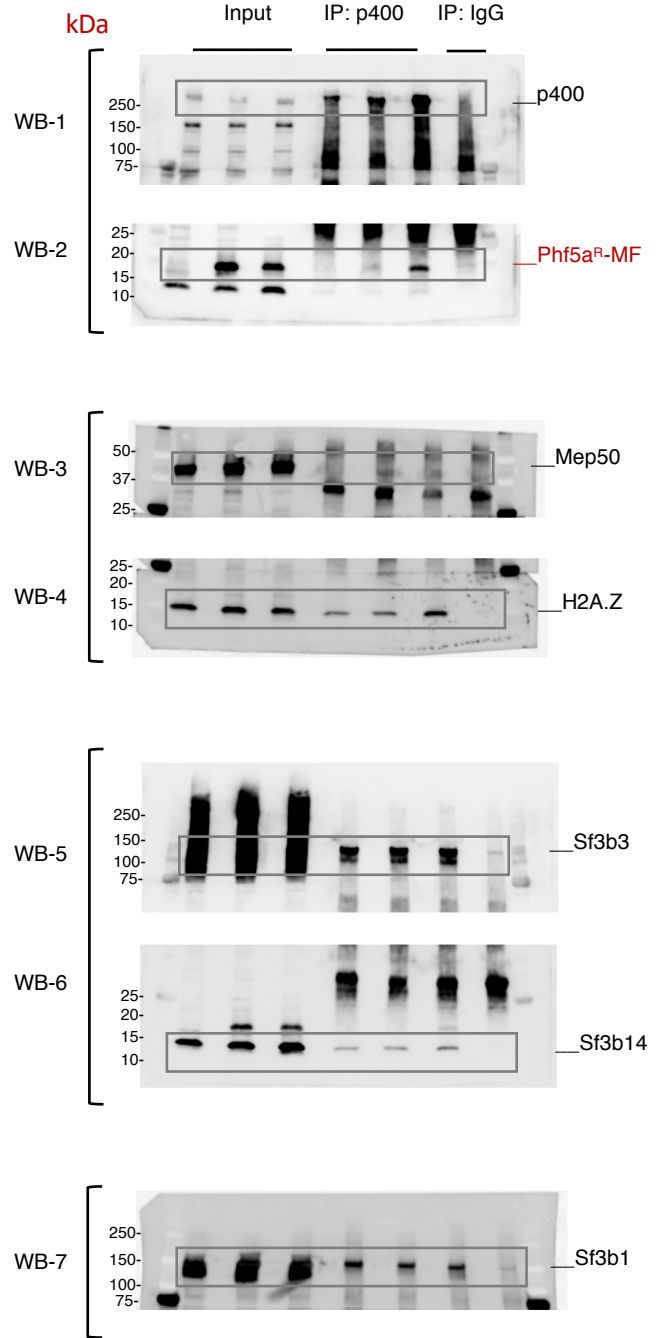

Source Data Fig. 7

Supplement: EMBJ-40-e106393-s007.pdf [file EMBJ-40-e106393-s007.pdf]

B

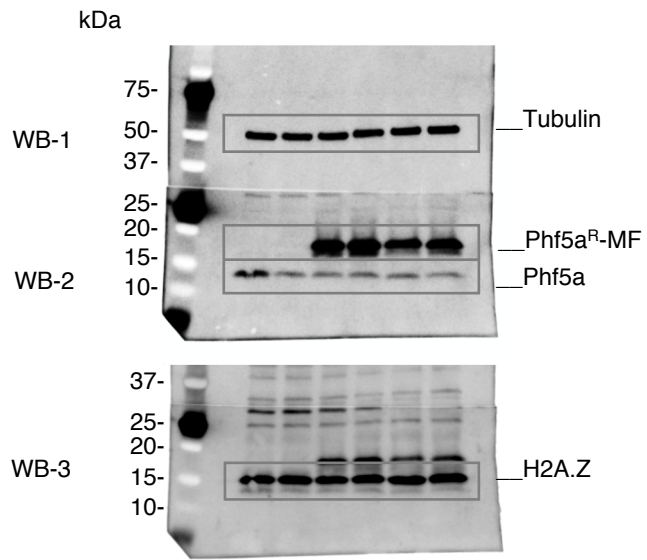

Source data Fig. 8

Supplement: EMBJ-40-e106393-s009.pdf [file EMBJ-40-e106393-s009.pdf]
